# Supplementary material
Source: PubMed Central journal article supplement (PMC3640846)
Supplement: NIHMS456905-supplement-01.pdf [file NIHMS456905-supplement-01.pdf]

**Molecular Cell, Volume 49**

**Supplemental Information**

**Insights into Negative Regulation**

**by the Glucocorticoid Receptor from Genome-wide**

**Profiling of Inflammatory Cistromes**

N. Henriette Uhlenhaut, Grant D. Barish, Ruth T. Yu, Michael Downes, Malith Karunasiri, Christopher Liddle, Petra Schwalie, Norbert Hübner, and Ronald M. Evans

Supplementary Figure 1, related to Figures 1 and 2, Uhlenhaut et al.

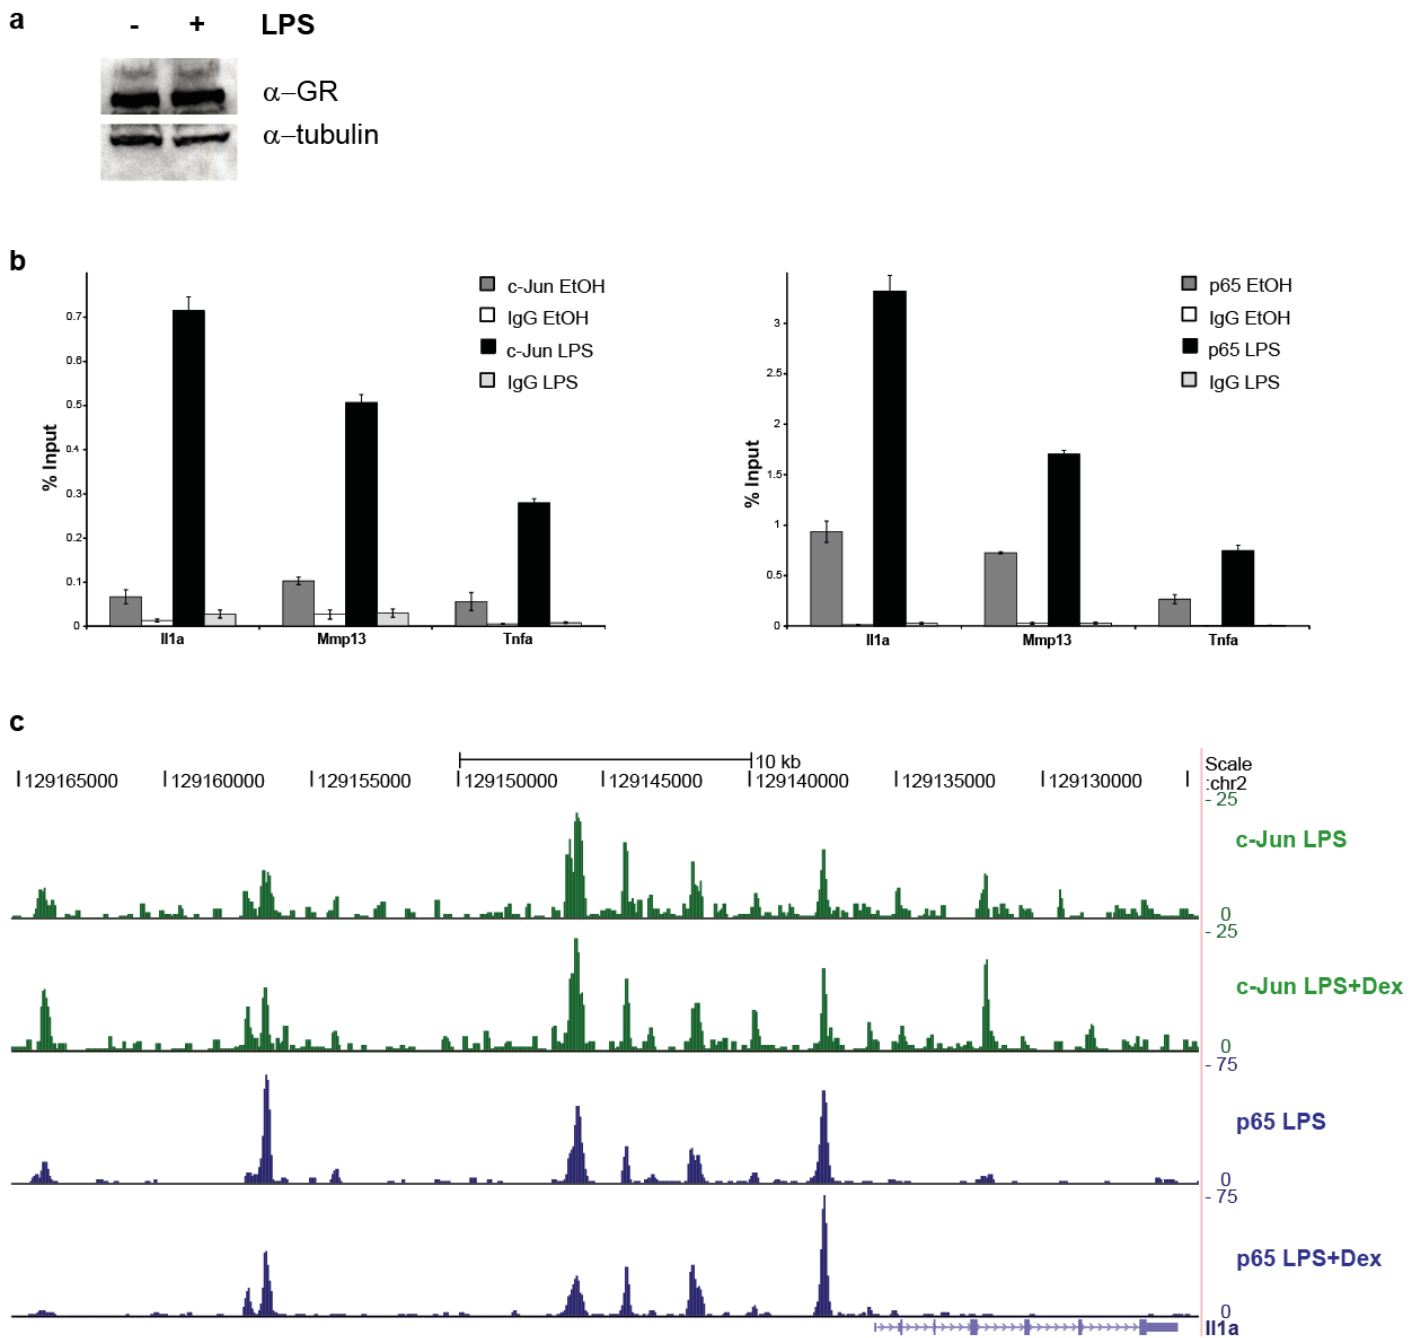

**Figure S1.**

**a) GR protein expression levels are unaffected by 3 hours of LPS stimulation.** Western Blot to detect GR protein levels in macrophages before and after 3 hours of LPS treatment. Equal amounts of total protein were loaded and tubulin was used as a loading control. **b) AP-1 and NF- $\kappa$ B DNA binding is almost undetectable in the absence of LPS stimuli.** ChIP-qPCR experiments using c-Jun and p65 antibodies show almost no enrichment for known target enhancers in the absence of LPS stimulation, but confirm significant chromatin occupancy after 3 hours of TLR4 activation in primary macrophages. **c) AP-1 and NF- $\kappa$ B binding is not affected by GR ligand treatment.** Representative example of ChIP-sequencing tracks observed at inflammatory loci that are repressed by Dex, i.e. the IL-1a locus. c-Jun (green) and p65 (blue) occupancy at cis-regulatory regions in macrophages treated with LPS and in cells treated with LPS plus Dex appears identical.

Supplementary Figure 2, related to Figure 3, Uhlenhaut et al.

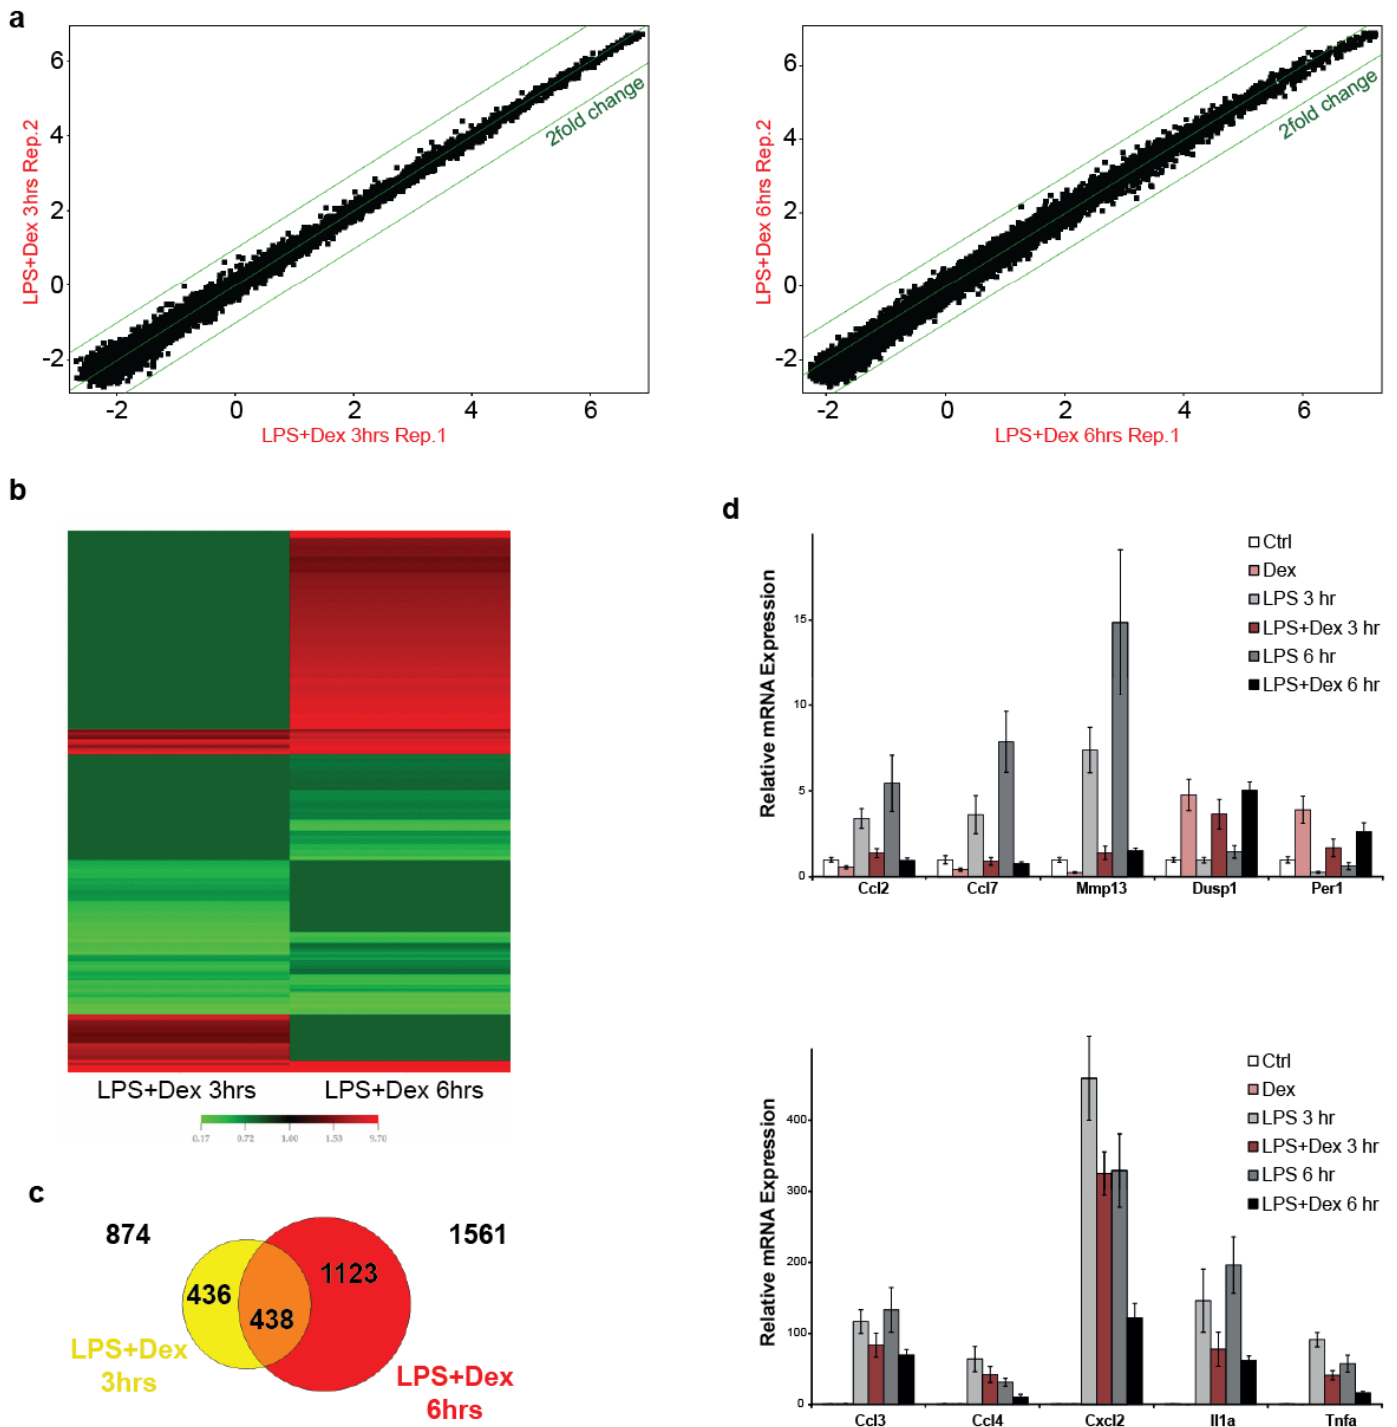

**Figure S2. Reproducibility of Microarray Expression Profiles**

a) Probe intensity profiles of replicate chip experiments (LPS+Dex at 3hrs and at 6hrs, performed in duplicate) show excellent correlation (log scale, green lines denote twofold changes in expression levels). b) Heatmap of microarray expression profiles at 3hrs and at 6hrs of LPS+Dex treatment. Each line depicts one probeset, red color = upregulation, green color = downregulation. c) Venn diagram of differentially expressed genes (1.5 fold change) at both timepoints. 438 genes show up- or downregulation at both timepoints. d) RT-qPCR experiments confirm differential expression as detected by microarray profiling. Real time qPCR using RNA isolated from primary mouse macrophages confirms downregulation of GR target genes predicted to be repressed from the microarray data set (with primers against *Ccl2*, *Ccl7*, *Mmp13*, *Ccl3*, *Ccl4*, *Cxcl2*, *Il1a* and *Tnfa*) for two different timepoints, 3 and 6 hours. Similarly, using primers against *Dusp1* and *Per1*, the upregulation of GR target genes observed in the microarray experiment was confirmed as well.

**Supplementary Figure 3, related to Figure 4, Uhlenhaut et al.**

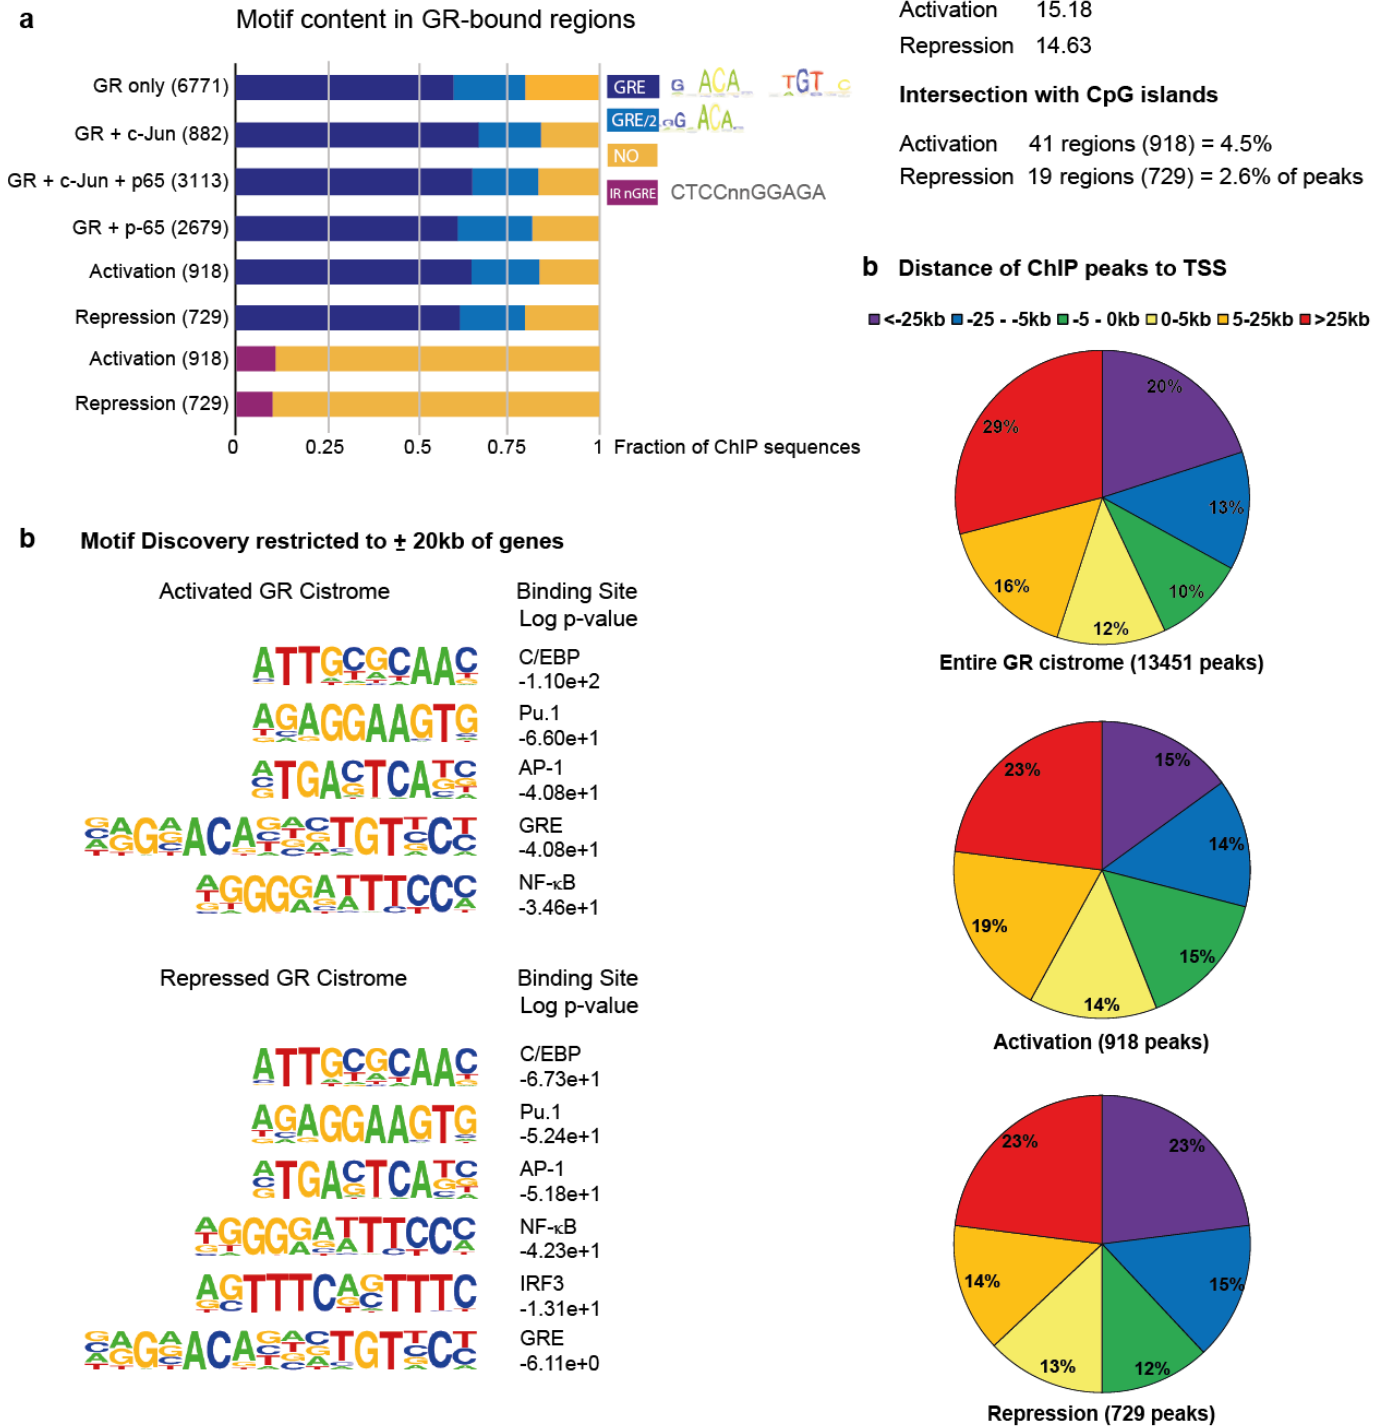

**Figure S3. Statistical analysis of ChIP peaks associated with activation vs. repression**

a) Lack of GRE de-enrichment in tethering or repressive scenarios. Bars show fractions of GR ChIP-sequences containing GREs: Motif content analysis of GR ChIP sequences shows that roughly 60% of cis-regulatory elements contain classical GREs, and an additional 20% contain a GRE half site. These proportions do not change significantly in peaks overlapping with AP-1 or NF-κB occupancy, nor between peaks associated with transcriptional activation vs repression. In addition, we could not detect the IR nGRE motif (Surjit et al.) in more than about 10% of peaks. b) Overrepresented motifs detected in ChIP sequences located within 20kb up- or downstream of differentially expressed genes. c) Average scores of ChIP peaks associated with up- and downregulation, and number of ChIP peaks that overlap with or lie next to annotated CpG islands. d) Genomic location of GR ChIP peaks with respect to the TSS of the nearest gene (linear proximity). Note that motifs (apart from IRF3), genomic distribution, peak height and intersection with CpG islands is similar for positive and negative sites.

Supplementary Figure 4, related to Figures 1 and 4, Uhlenhaut et al.

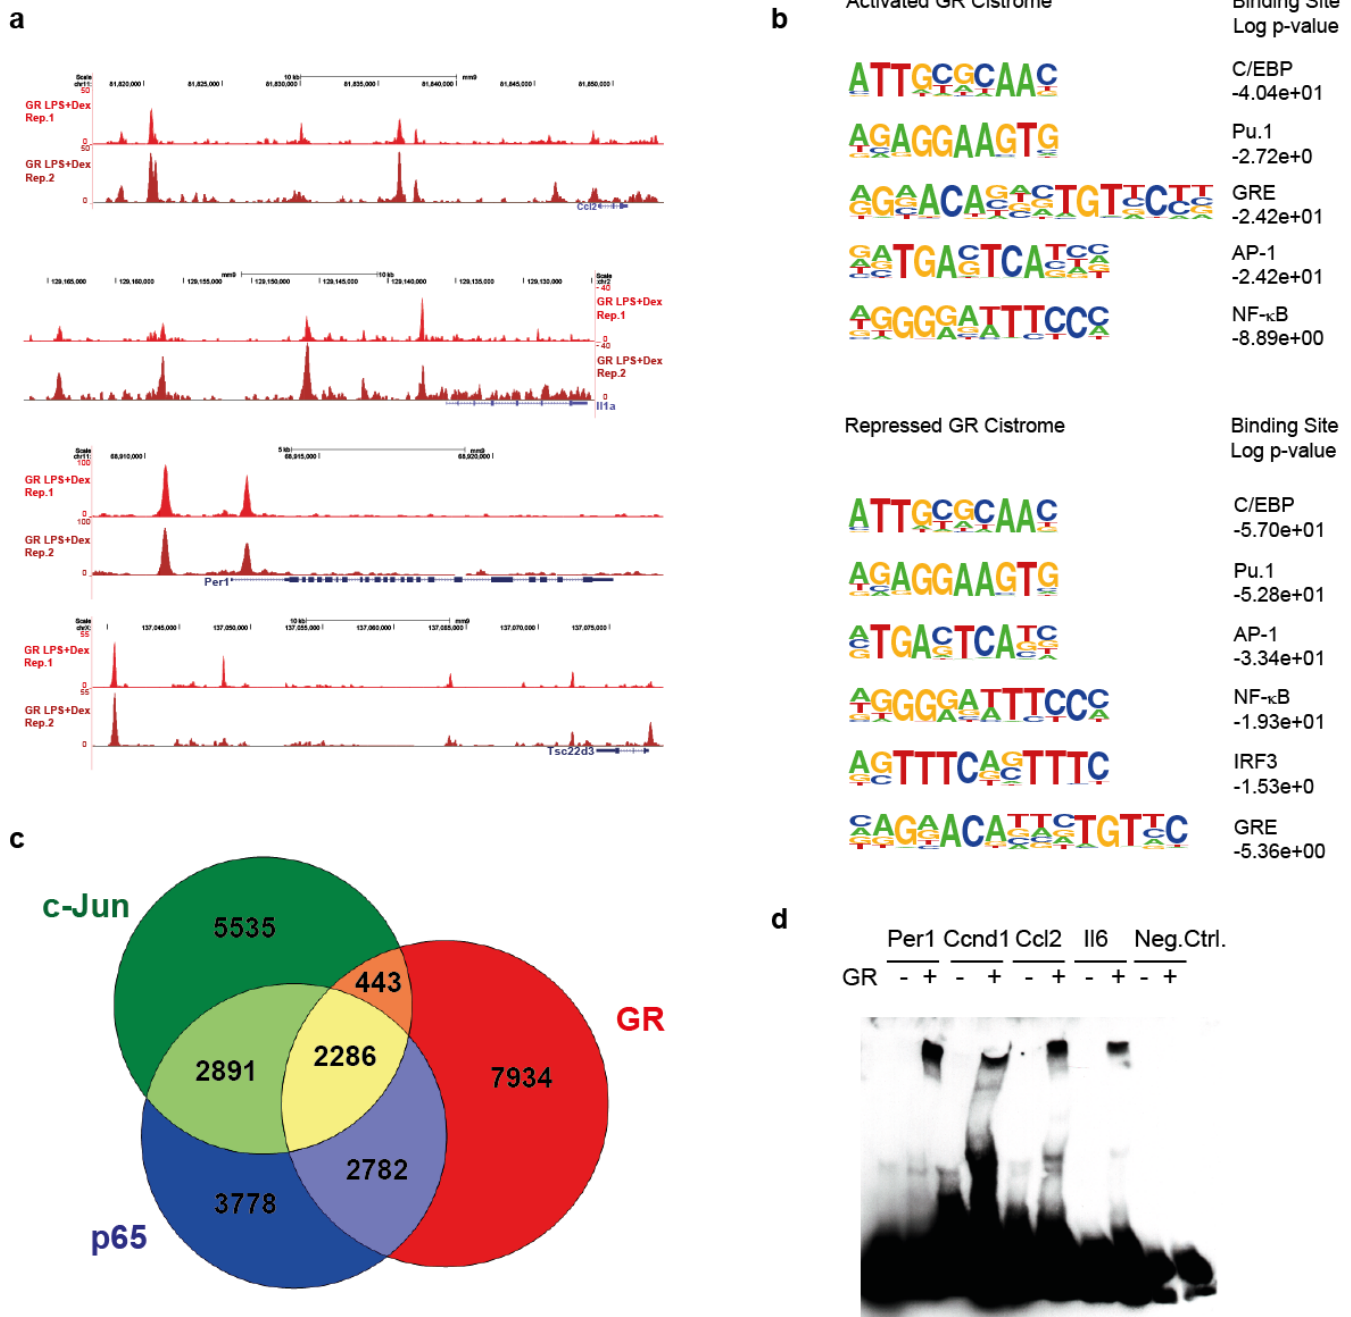

**Figure S4. Reproducibility of GR ChIP-Seq experiments**

a) Representative examples of GR ChIP-sequencing tracks, from two biological replicates. GR ChIP-peaks appear nearly identical at repressed (*Ccl2*, *Il1a*) as well as at activated (*Per1*, *Gilz*) loci, in response to stimulation by LPS and Dex. b) Motif discovery in GR ChIP-sequences that are linked to activation/repression of nearby gene expression. Genes that showed at least 1.5fold differential expression when comparing LPS to LPS+Dex treated RNA microarray samples for the two different timepoints examined (both at 3 and at 6 hours post treatment) were assigned to nearby ChIP peaks. Those peaks that were consistently called in the two biological ChIP-Seq replicates were used for motif analysis. This analysis confirms the co-occurrence of Pu.1, C/EBP, NF-κB, AP-1 and GRE motifs at both up- and downregulated genes and the IRF3 motif associated with repression. c) NF-κB and AP-1 ChIP-Seq replicates. Venn diagram showing peak overlap of GR with ChIP signals from two independent biological replicates using p65 and c-Jun antibodies, confirming the intersections of cistromes shown in figure 1c. Numbers represent ChIP peaks. d) GR binds ChIP-peak GREs in vitro. EMSAs using biotinylated oligos containing the GRE motif sequences identified in Figure 4. Addition of human recombinant GR protein results in a gel shift only for *Per1*, *Ccnd1*, *Ccl2* and *Il6* GREs, but not for an unrelated negative control sequence.

Supplementary Figure 5, related to Figures 1 and 5, Uhlenhaut et al.

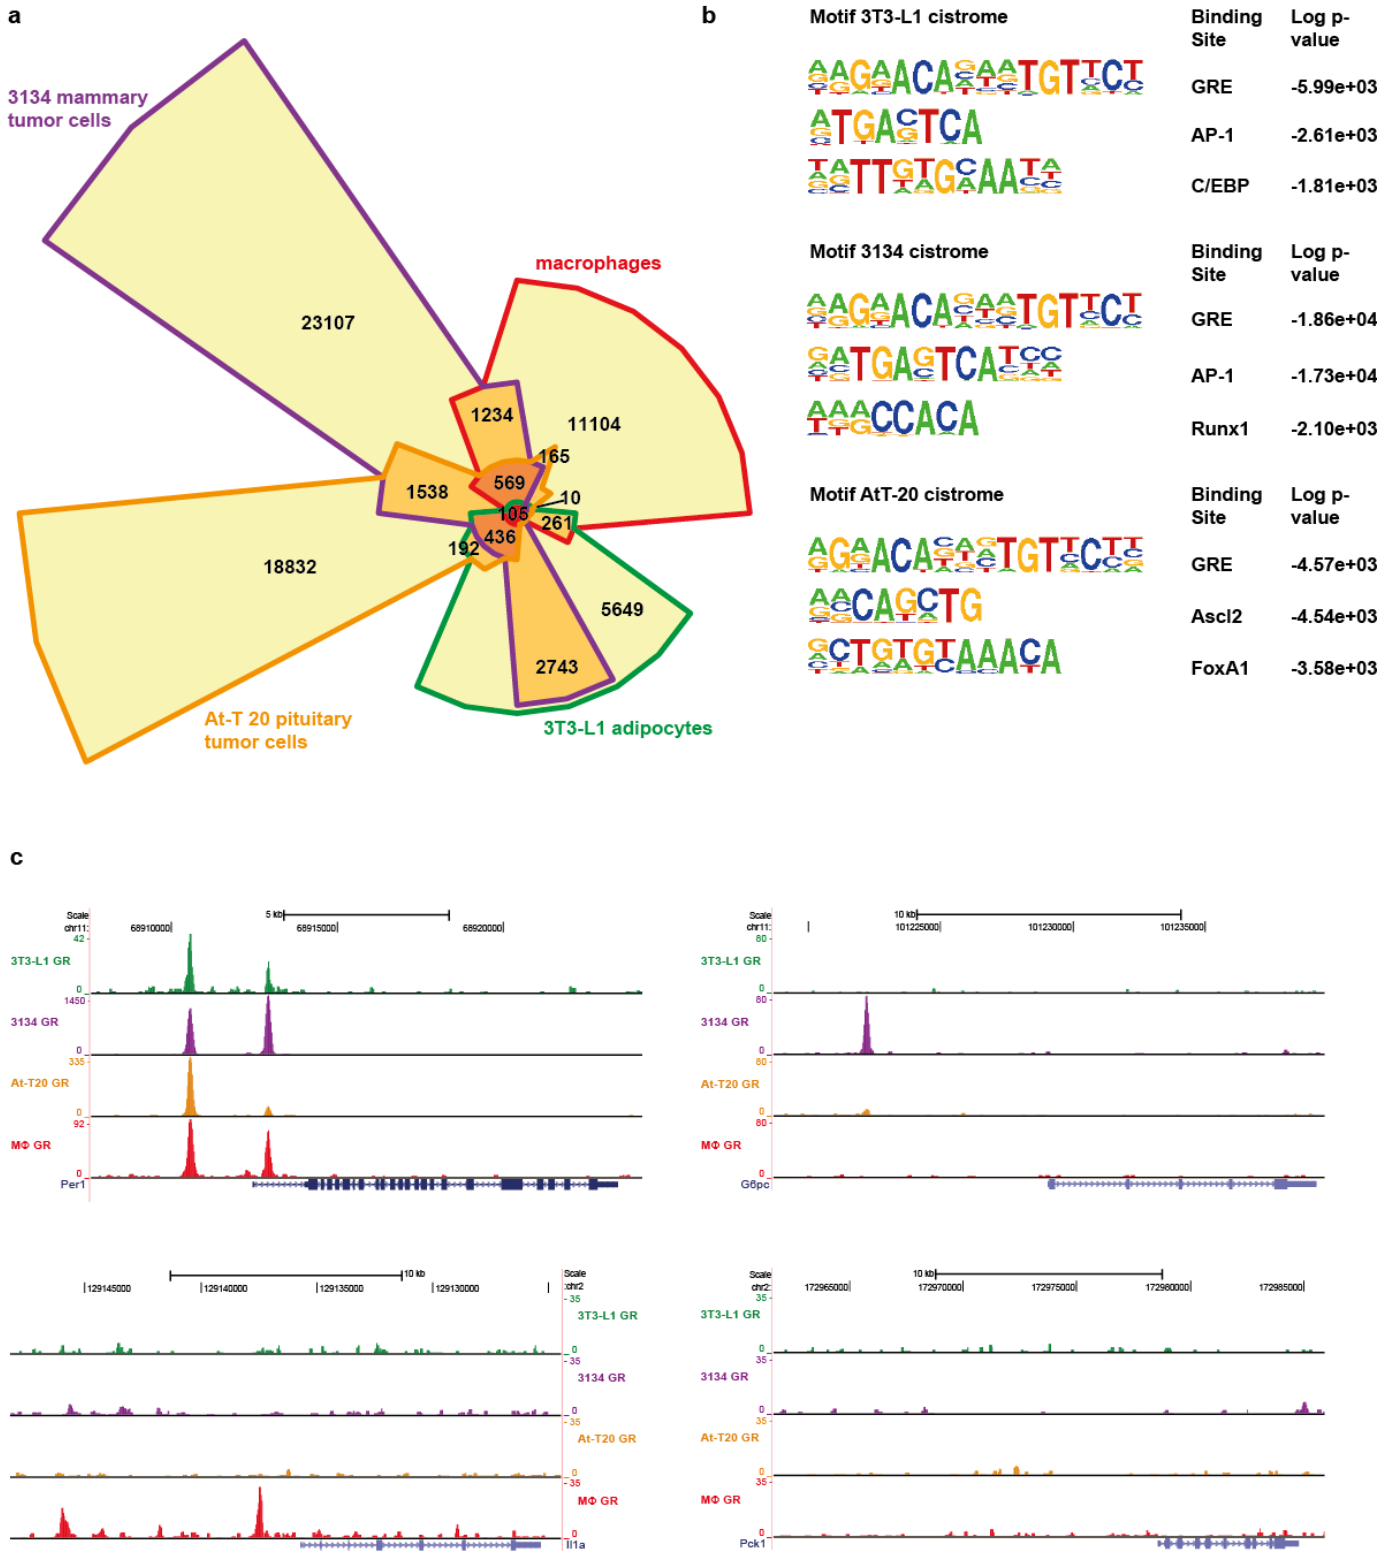

**Figure S5. Cell type specific GR cistromes**

a) Area proportional Euler diagram showing the overlap between genomic GR binding sites in 3134, AtT-20, 3T3-L1 cell lines and primary macrophages. Numbers represent detected ChIP-Seq peaks. Shades of yellow represent the amount of overlap between different cell types. b) De novo motif analysis of GR cistromes in different cell types. c) Visualization of GR ChIP-sequencing tracks in different cell types, showing *Per1*, *G6pc*, *I11a* and *Pck1* loci. Data was used from John et al. and Steger et al.

Supplementary Figure 6, related to Figure 6, Uhlenhaut et al.

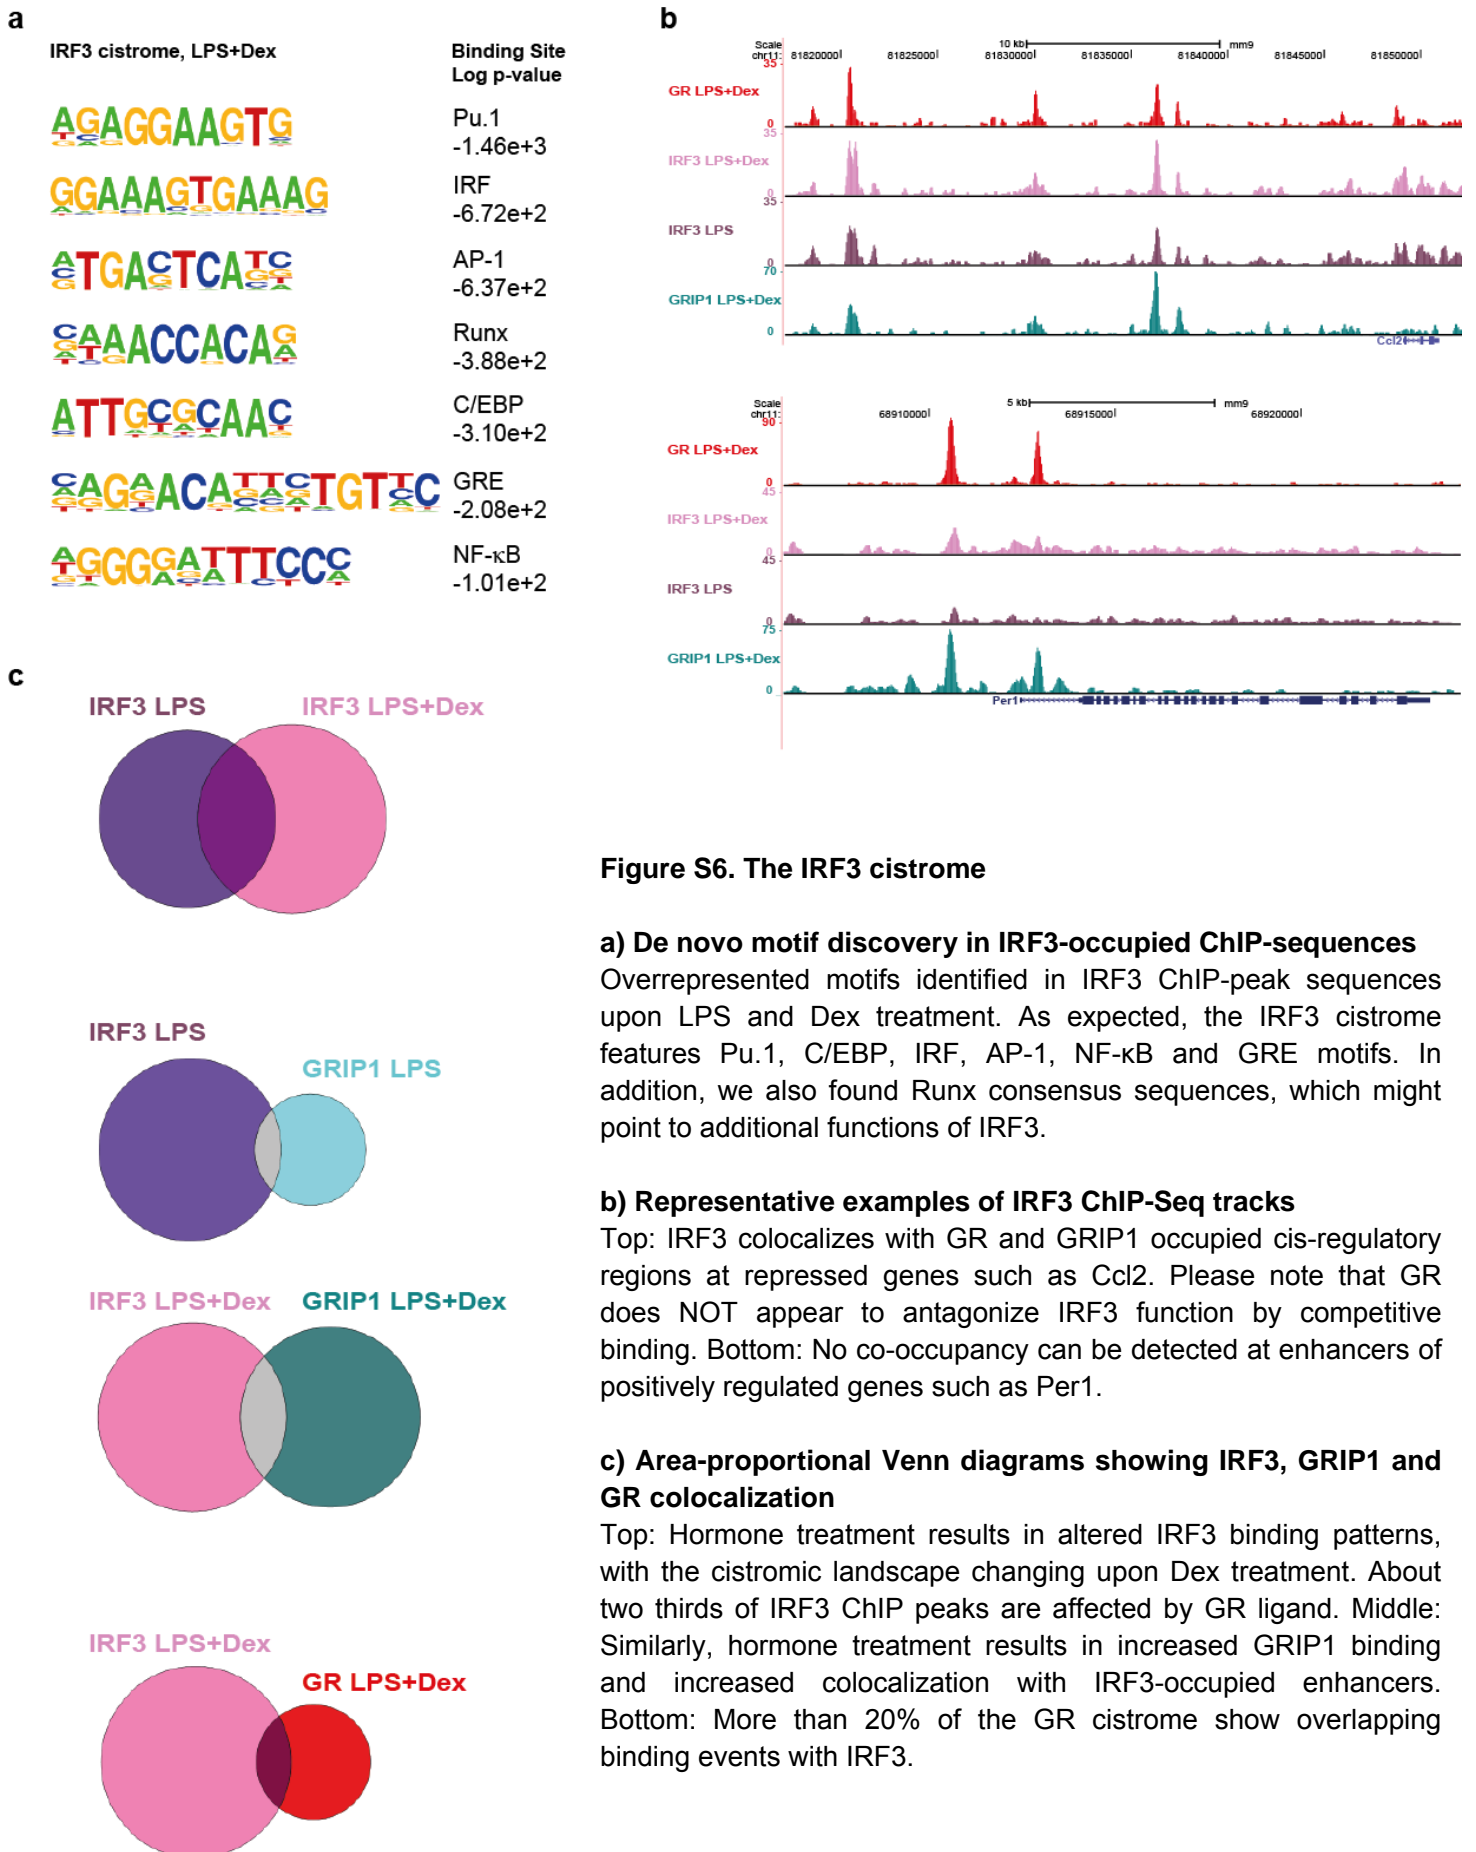

Supplementary Figure 7, related to Figure 7, Uhlenhaut et al.

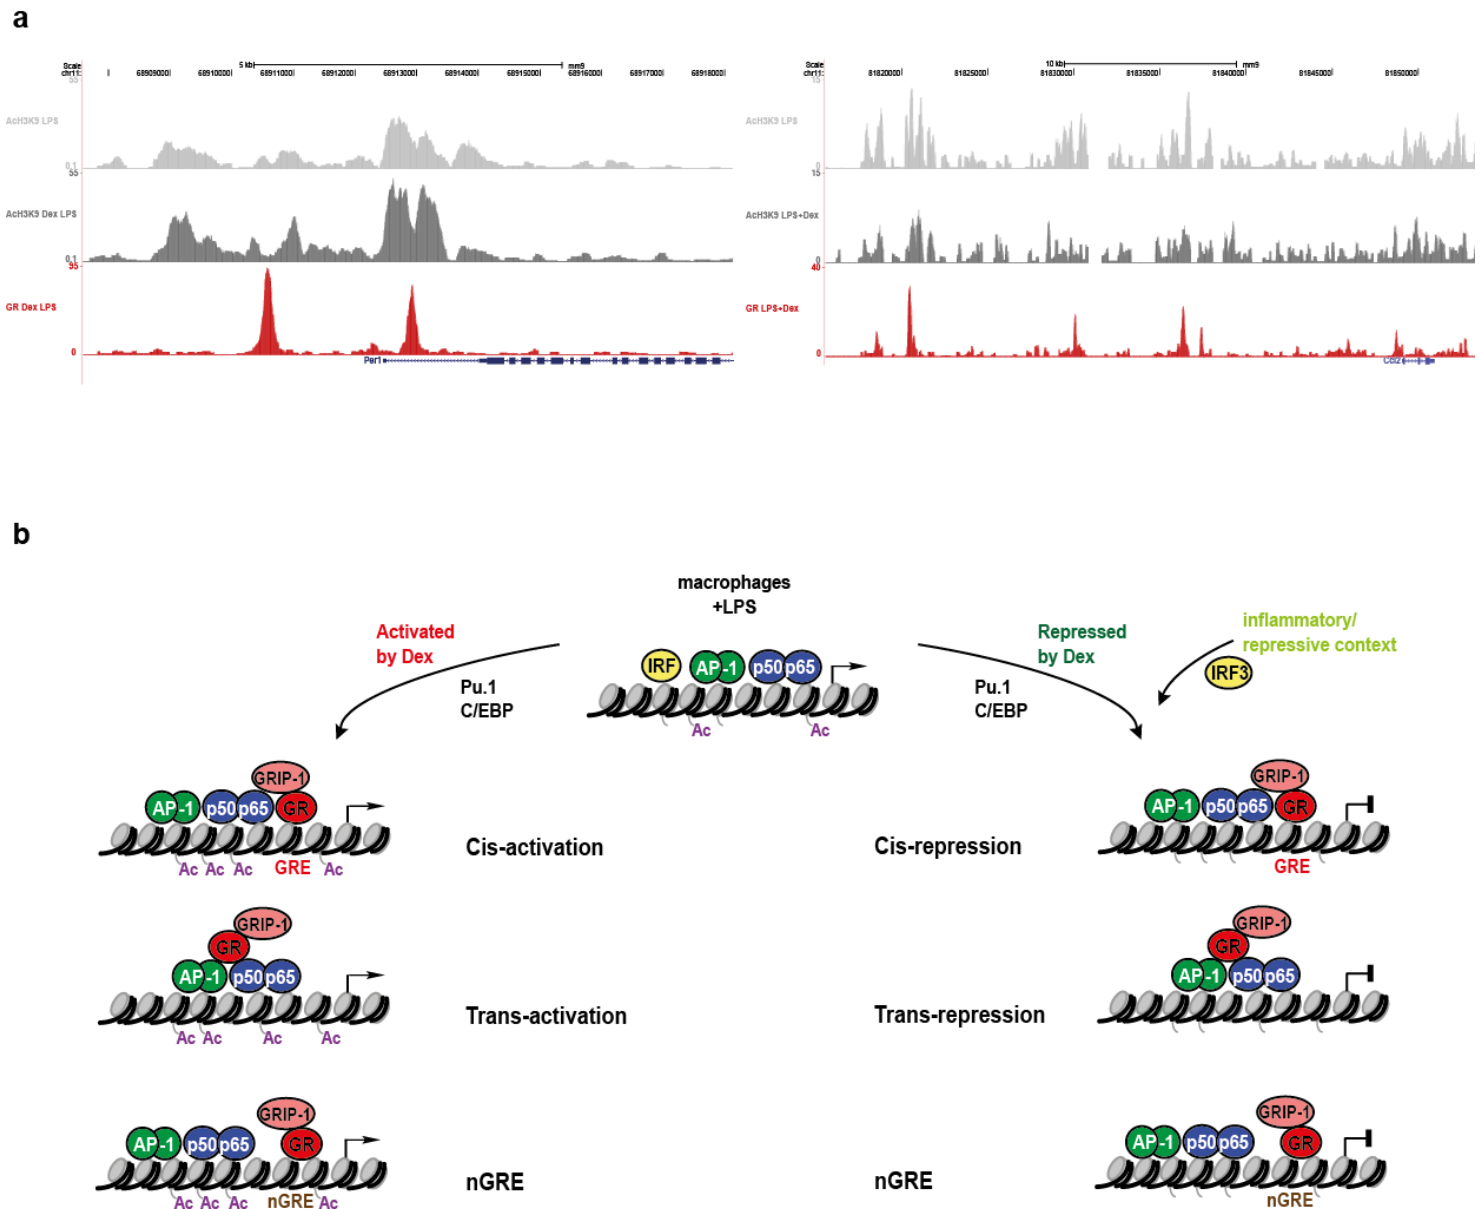

**Figure S7.**

**a) Activation and repression by GR correlate with changes in histone acetylation.** Representative ChIP-sequencing tracks of histone H3K9 acetylation marks. Loci that are activated by GR, such as *Per1*, show an increase in acetylated histone peaks, whereas repressed loci such as *Ccl2* display reduced H3K9 acetylation patterns. **b) Model of GR-mediated gene regulation in macrophages.** When macrophages are stimulated by an inflammatory trigger such as LPS, TLR4 signaling leads to the activation and nuclear localization of AP-1 and NF- $\kappa$ B (and IRF3) and to chromatin reorganization and changes in accessibility. In these stimulated cells, the GR thus binds to a subset of enhancers, specified by the lineage-determining transcription factors Pu.1 and C/EBP, mainly corresponding to inflammatory genes, and colocalizing with AP-1 and NF- $\kappa$ B. The resulting anti-inflammatory GR cisrome features canonical GRE motifs as well as C/EBP and Pu.1 consensus sequences. Interestingly, but positive and negative enhancers display the same motif content. Both up- and downregulated genes display AP-1, NF- $\kappa$ B and GRIP1 occupancy, and hormone responsiveness can be equally conferred by classical GREs, tethering or nGREs. At negative enhancers, GR may antagonize inflammatory gene expression by utilizing the corepressor function of GRIP-1 and interfering with IRF3, AP-1 and NF- $\kappa$ B transcriptional activity. These repressive sites are characterized by depletion of histone H3K9 acetylation marks (and corresponding HDAC recruitment), whereas activated loci show increased acetyl-histone patterns (in conjunction with p300/CBP HAT activity).



**Table S1, Uhlenhaut et al.****Table S1A:****Functional categories of GR cistromes in different states****Quiescent (Dex only, 6938 sites)**

| <b>Term Name</b>                                                     | <b>Binom Raw<br/>P-Value</b> | <b>Binom Observed<br/>Region Hits</b> | <b>Hyper Observed<br/>Gene Hits</b> | <b>Hyper Total<br/>Genes</b> |
|----------------------------------------------------------------------|------------------------------|---------------------------------------|-------------------------------------|------------------------------|
| activation of MAPK activity                                          | 4.13873E-12                  | 117                                   | 35                                  | 60                           |
| positive regulation of JUN kinase activity                           | 1.38123E-06                  | 55                                    | 15                                  | 23                           |
| regulation of protein homodimerization activity                      | 2.23701E-06                  | 25                                    | 5                                   | 5                            |
| dichotomous subdivision of an epithelial terminal unit               | 3.93594E-05                  | 35                                    | 7                                   | 8                            |
| sprouting angiogenesis                                               | 4.56207E-05                  | 40                                    | 9                                   | 10                           |
| dichotomous subdivision of terminal units (salivary gland branching) | 6.28006E-05                  | 31                                    | 5                                   | 5                            |
| negative regulation of peptidyl-tyrosine phosphorylation             | 7.91768E-05                  | 20                                    | 8                                   | 10                           |
| regulation of alpha-beta T cell proliferation                        | 8.25489E-05                  | 34                                    | 10                                  | 13                           |
| regulation of macrophage derived foam cell differentiation           | 0.000150234                  | 32                                    | 11                                  | 16                           |
| positive regulation of alpha-beta T cell proliferation               | 0.000269135                  | 25                                    | 8                                   | 9                            |
| negative T cell selection                                            | 0.00027832                   | 23                                    | 8                                   | 10                           |
| vacuolar transport                                                   | 0.000334214                  | 25                                    | 14                                  | 20                           |
| phagocytosis, engulfment                                             | 0.000358011                  | 26                                    | 10                                  | 14                           |
| sphingomyelin biosynthetic process                                   | 0.000379519                  | 10                                    | 5                                   | 5                            |
| positive regulation of phagocytosis                                  | 0.000379839                  | 29                                    | 16                                  | 25                           |
| positive regulation of phosphatase activity                          | 0.000394656                  | 18                                    | 7                                   | 8                            |
| lysosomal transport                                                  | 0.000594066                  | 23                                    | 12                                  | 16                           |
| positive regulation of cholesterol storage                           | 0.001975971                  | 20                                    | 6                                   | 6                            |

**Constant (Dex and LPS+Dex, 3629 sites)**

| <b>Term Name</b>                                   | <b>Binom Raw<br/>P-Value</b> | <b>Binom Observed<br/>Region Hits</b> | <b>Hyper Observed<br/>Gene Hits</b> | <b>Hyper Total<br/>Genes</b> |
|----------------------------------------------------|------------------------------|---------------------------------------|-------------------------------------|------------------------------|
| regulation of immune system process                | 1.74476E-35                  | 325                                   | 149                                 | 439                          |
| response to wounding                               | 1.13039E-34                  | 349                                   | 173                                 | 489                          |
| response to bacterium                              | 1.90031E-30                  | 199                                   | 87                                  | 251                          |
| regulation of cytokine production                  | 1.16662E-28                  | 165                                   | 81                                  | 193                          |
| response to other organism                         | 4.64157E-27                  | 226                                   | 107                                 | 353                          |
| regulation of intracellular protein kinase cascade | 8.75294E-27                  | 240                                   | 108                                 | 284                          |
| response to molecule of bacterial origin           | 1.91054E-25                  | 154                                   | 62                                  | 145                          |
| response to lipopolysaccharide                     | 7.19207E-25                  | 148                                   | 57                                  | 131                          |
| response to biotic stimulus                        | 3.48528E-24                  | 246                                   | 121                                 | 428                          |
| inflammatory response                              | 2.02843E-23                  | 188                                   | 95                                  | 271                          |
| immune response                                    | 3.04406E-23                  | 237                                   | 138                                 | 442                          |
| regulation of response to stress                   | 9.22022E-22                  | 213                                   | 95                                  | 286                          |
| positive regulation of immune system process       | 3.93647E-20                  | 194                                   | 85                                  | 271                          |

|                                              |             |     |    |     |
|----------------------------------------------|-------------|-----|----|-----|
| phagocytosis                                 | 5.78327E-20 | 66  | 24 | 50  |
| induction of apoptosis                       | 2.80036E-19 | 150 | 69 | 198 |
| induction of programmed cell death           | 3.80284E-19 | 150 | 69 | 199 |
| response to oxidative stress                 | 1.83429E-18 | 127 | 55 | 174 |
| cytokine-mediated signaling pathway          | 1.95972E-18 | 74  | 30 | 77  |
| wound healing                                | 5.92186E-17 | 156 | 67 | 179 |
| regulation of angiogenesis                   | 1.37692E-16 | 77  | 29 | 78  |
| regulation of interleukin-6 production       | 1.7028E-16  | 52  | 21 | 42  |
| negative regulation of response to stimulus  | 2.73445E-16 | 126 | 51 | 127 |
| negative regulation of cytokine production   | 1.78269E-15 | 57  | 25 | 42  |
| regulation of defense response               | 3.52216E-15 | 116 | 55 | 150 |
| positive regulation of angiogenesis          | 5.3132E-15  | 55  | 18 | 42  |
| cellular response to extracellular stimulus  | 7.41926E-15 | 75  | 29 | 83  |
| negative regulation of defense response      | 8.07319E-15 | 51  | 20 | 46  |
| regulation of binding                        | 1.27439E-14 | 145 | 64 | 170 |
| positive regulation of cytokine production   | 1.69949E-14 | 82  | 43 | 93  |
| negative regulation of inflammatory response | 5.3773E-14  | 45  | 17 | 32  |

#### Anti-inflammatory (LPS+Dex, 9822 sites)

| Term Name                                                | Binom Raw<br>P-Value | Binom Observed<br>Region Hits | Hyper Observed<br>Gene Hits | Hyper Total<br>Genes |
|----------------------------------------------------------|----------------------|-------------------------------|-----------------------------|----------------------|
| regulation of cytokine production                        | 2.98307E-48          | 381                           | 112                         | 193                  |
| regulation of cytokine biosynthetic process              | 5.97082E-31          | 166                           | 46                          | 75                   |
| regulation of defense response                           | 1.29199E-30          | 291                           | 91                          | 150                  |
| regulation of inflammatory response                      | 2.97504E-28          | 210                           | 61                          | 92                   |
| regulation of T cell activation                          | 1.33546E-25          | 265                           | 77                          | 122                  |
| cytokine-mediated signaling pathway                      | 9.39943E-24          | 151                           | 48                          | 77                   |
| homeostasis of number of cells                           | 2.54386E-23          | 210                           | 62                          | 111                  |
| positive regulation of cytokine biosynthetic process     | 9.77605E-23          | 115                           | 34                          | 52                   |
| B cell activation                                        | 1.18434E-21          | 198                           | 55                          | 82                   |
| icosanoid metabolic process                              | 1.81164E-21          | 96                            | 30                          | 43                   |
| negative regulation of cell activation                   | 1.23869E-20          | 134                           | 42                          | 61                   |
| negative regulation of immune system process             | 2.37306E-20          | 187                           | 62                          | 98                   |
| negative regulation of leukocyte activation              | 2.92237E-20          | 127                           | 39                          | 57                   |
| negative regulation of lymphocyte activation             | 3.76181E-20          | 119                           | 36                          | 53                   |
| positive regulation of peptidyl-tyrosine phosphorylation | 5.56914E-20          | 133                           | 33                          | 52                   |
| negative regulation of cytokine production               | 9.83188E-20          | 115                           | 31                          | 42                   |
| unsaturated fatty acid biosynthetic process              | 3.71469E-19          | 74                            | 23                          | 32                   |
| icosanoid biosynthetic process                           | 5.40893E-19          | 73                            | 22                          | 31                   |
| regulation of alpha-beta T cell activation               | 2.34654E-18          | 124                           | 25                          | 35                   |
| regulation of peptidyl-tyrosine phosphorylation          | 4.05727E-18          | 169                           | 48                          | 73                   |
| negative regulation of defense response                  | 5.84574E-18          | 100                           | 29                          | 46                   |
| negative regulation of inflammatory response             | 1.19396E-17          | 89                            | 23                          | 32                   |
| regulation of tyrosine phosphorylation of STAT protein   | 1.21125E-16          | 69                            | 17                          | 24                   |
| regulation of JAK-STAT cascade                           | 1.55425E-16          | 93                            | 25                          | 34                   |
| negative regulation of T cell activation                 | 3.49901E-16          | 101                           | 30                          | 43                   |

|                                                 |             |     |    |    |
|-------------------------------------------------|-------------|-----|----|----|
| regulation of B cell activation                 | 3.80296E-16 | 118 | 37 | 57 |
| B cell differentiation                          | 4.76671E-16 | 132 | 28 | 45 |
| regulation of I-kappaB kinase/NF-kappaB cascade | 9.02225E-16 | 163 | 64 | 99 |
| regulation of lymphocyte differentiation        | 2.23749E-15 | 137 | 38 | 62 |
| regulation of interleukin-12 production         | 4.95578E-15 | 75  | 20 | 26 |

# GREAT version 1.8

Species assembly: mm9

Association rule: Basal+extension: 5000 bp upstream, 1000 bp downstream, 1000000 bp max extension, curated regulatory domains included

## Table S1B:

### Functional categories of GR cistromes in different cell types

#### Macrophage-specific

| Term Name                                            | Binom Raw<br>P-Value | Binom Observed<br>Region Hits | Hyper Observed<br>Gene Hits | Hyper Total<br>Genes |
|------------------------------------------------------|----------------------|-------------------------------|-----------------------------|----------------------|
| regulation of cytokine production                    | 1.51E-62             | 453                           | 124                         | 193                  |
| inflammatory response                                | 1.04E-51             | 527                           | 155                         | 271                  |
| regulation of cell activation                        | 2.83E-42             | 461                           | 127                         | 194                  |
| regulation of defense response                       | 5.70E-40             | 346                           | 95                          | 150                  |
| regulation of lymphocyte activation                  | 6.63E-39             | 392                           | 105                         | 161                  |
| cytokine-mediated signaling pathway                  | 2.37E-35             | 191                           | 51                          | 77                   |
| response to molecule of bacterial origin             | 1.24E-34             | 365                           | 90                          | 145                  |
| regulation of inflammatory response                  | 4.72E-34             | 244                           | 64                          | 92                   |
| negative regulation of response to stimulus          | 1.94E-32             | 344                           | 82                          | 127                  |
| regulation of cytokine biosynthetic process          | 1.45E-31             | 181                           | 50                          | 75                   |
| positive regulation of cell activation               | 7.05E-31             | 321                           | 81                          | 125                  |
| regulation of T cell activation                      | 3.27E-30             | 305                           | 81                          | 122                  |
| phagocytosis                                         | 3.70E-27             | 145                           | 34                          | 50                   |
| B cell activation                                    | 7.20E-27             | 232                           | 55                          | 82                   |
| positive regulation of cytokine production           | 9.68E-27             | 215                           | 58                          | 93                   |
| negative regulation of immune system process         | 2.98E-26             | 222                           | 65                          | 98                   |
| positive regulation of cytokine biosynthetic process | 8.05E-26             | 131                           | 37                          | 52                   |
| leukocyte migration                                  | 1.88E-25             | 159                           | 41                          | 58                   |
| icosanoid metabolic process                          | 3.39E-25             | 111                           | 30                          | 43                   |
| homeostasis of number of cells                       | 3.86E-25             | 235                           | 65                          | 111                  |

#### 3T3-L1-specific

| Term Name                | Binom Raw<br>P-Value | Binom Observed<br>Region Hits | Hyper Observed<br>Gene Hits | Hyper Total<br>Genes |
|--------------------------|----------------------|-------------------------------|-----------------------------|----------------------|
| vasculature development  | 2.94E-59             | 555                           | 133                         | 299                  |
| blood vessel development | 2.37E-58             | 538                           | 126                         | 288                  |

|                                                                  |          |     |     |     |
|------------------------------------------------------------------|----------|-----|-----|-----|
| blood vessel morphogenesis                                       | 1.59E-40 | 428 | 107 | 239 |
| angiogenesis                                                     | 1.92E-38 | 316 | 73  | 164 |
| regulation of cellular component movement                        | 1.47E-37 | 372 | 90  | 227 |
| organ regeneration                                               | 7.20E-37 | 128 | 18  | 47  |
| regulation of cell migration                                     | 4.98E-36 | 348 | 80  | 207 |
| positive regulation of Ras protein signal transduction           | 5.85E-36 | 90  | 10  | 17  |
| regulation of anatomical structure size                          | 9.89E-36 | 370 | 105 | 304 |
| positive regulation of small GTPase mediated signal transduction | 2.92E-33 | 90  | 10  | 18  |
| regulation of protein amino acid phosphorylation                 | 1.17E-32 | 306 | 79  | 208 |
| positive regulation of cellular protein metabolic process        | 2.56E-31 | 280 | 81  | 215 |
| positive regulation of locomotion                                | 1.87E-29 | 239 | 58  | 132 |
| regulation of cell growth                                        | 1.90E-29 | 256 | 68  | 178 |
| negative regulation of growth                                    | 4.73E-29 | 192 | 45  | 130 |
| positive regulation of protein metabolic process                 | 6.06E-29 | 295 | 89  | 229 |
| regulation of cell size                                          | 8.25E-29 | 266 | 70  | 197 |
| anti-apoptosis                                                   | 8.40E-29 | 202 | 50  | 123 |
| cellular response to hormone stimulus                            | 1.70E-28 | 193 | 44  | 129 |
| response to hypoxia                                              | 4.30E-28 | 234 | 62  | 163 |

### 3134-specific

|                                                         | Binom Raw | Binom Observed | Hyper Observed | Hyper Total |
|---------------------------------------------------------|-----------|----------------|----------------|-------------|
| Term Name                                               | P-Value   | Region Hits    | Gene Hits      | Genes       |
| negative regulation of transferase activity             | 5.76E-55  | 508            | 79             | 95          |
| cellular response to peptide hormone stimulus           | 7.13E-44  | 423            | 64             | 83          |
| negative regulation of kinase activity                  | 3.67E-43  | 456            | 77             | 91          |
| regulation of epithelial cell differentiation           | 2.52E-42  | 280            | 25             | 30          |
| homeostasis of number of cells                          | 1.30E-41  | 462            | 90             | 111         |
| negative regulation of mitotic cell cycle               | 5.29E-38  | 182            | 16             | 18          |
| cellular response to insulin stimulus                   | 7.41E-38  | 391            | 57             | 76          |
| regulation of TGF beta receptor signaling pathway       | 1.09E-35  | 323            | 44             | 50          |
| fatty acid biosynthetic process                         | 4.74E-32  | 340            | 73             | 94          |
| leukocyte activation involved in immune response        | 9.37E-32  | 202            | 32             | 40          |
| regulation of smooth muscle cell proliferation          | 4.63E-31  | 313            | 41             | 47          |
| cell junction organization                              | 8.55E-28  | 256            | 37             | 46          |
| positive regulation of lipid metabolic process          | 2.05E-26  | 263            | 43             | 54          |
| regulation of cytokine biosynthetic process             | 7.68E-26  | 277            | 56             | 75          |
| lactation                                               | 8.27E-25  | 172            | 28             | 33          |
| cell junction assembly                                  | 2.02E-24  | 181            | 26             | 29          |
| positive regulation of cytoskeleton organization        | 2.80E-24  | 246            | 42             | 47          |
| erythrocyte homeostasis                                 | 5.69E-23  | 219            | 41             | 50          |
| positive regulation of smooth muscle cell proliferation | 6.32E-23  | 202            | 29             | 32          |
| regulation of B cell activation                         | 3.07E-22  | 239            | 44             | 57          |

### AtT-20-specific

|           | Binom Raw | Binom Observed | Hyper Observed | Hyper Total |
|-----------|-----------|----------------|----------------|-------------|
| Term Name | P-Value   | Region Hits    | Gene Hits      | Genes       |

|                                                                          |             |     |    |    |
|--------------------------------------------------------------------------|-------------|-----|----|----|
| regulation of cellular carbohydrate metabolic process                    | 5.13E-20    | 203 | 33 | 41 |
| regulation of carbohydrate metabolic process                             | 1.91E-19    | 203 | 33 | 42 |
| regulation of glucose metabolic process                                  | 1.33E-18    | 172 | 26 | 33 |
| positive regulation of cellular carbohydrate metabolic process           | 5.01E-14    | 133 | 19 | 23 |
| negative regulation of lipid biosynthetic process                        | 2.76E-11    | 74  | 14 | 16 |
| DNA damage response, signal transduction by p53 (induction of apoptosis) | 9.40474E-06 | 46  | 12 | 13 |

#### Common to all four cell types

|                                    | Binom Raw   | Binom Observed | Hyper Observed | Hyper Total |
|------------------------------------|-------------|----------------|----------------|-------------|
| Term Name                          | P-Value     | Region Hits    | Gene Hits      | Genes       |
| response to light stimulus         | 4.93E-08    | 11             | 9              | 131         |
| cellular protein metabolic process | 3.78E-07    | 40             | 38             | 1974        |
| response to radiation              | 8.20E-07    | 12             | 10             | 209         |
| transcription                      | 8.1248E-06  | 37             | 33             | 1639        |
| response to chemical stimulus      | 1.40669E-05 | 32             | 32             | 1443        |
| response to oxygen levels          | 0.000235216 | 9              | 9              | 172         |

#### Common to two or more cell types

|                                                             | Binom Raw   | Binom Observed | Hyper Observed | Hyper Total |
|-------------------------------------------------------------|-------------|----------------|----------------|-------------|
| Term Name                                                   | P-Value     | Region Hits    | Gene Hits      | Genes       |
| induction of programmed cell death                          | 3.61169E-28 | 275            | 92             | 199         |
| induction of apoptosis                                      | 4.58202E-28 | 274            | 91             | 198         |
| anti-apoptosis                                              | 6.36501E-26 | 231            | 60             | 123         |
| cellular response to peptide hormone stimulus               | 2.72701E-25 | 160            | 42             | 83          |
| cellular response to insulin stimulus                       | 2.33508E-24 | 153            | 38             | 76          |
| negative regulation of transferase activity                 | 4.63242E-23 | 172            | 44             | 95          |
| negative regulation of signal transduction                  | 6.71752E-23 | 198            | 61             | 110         |
| negative regulation of signaling process                    | 6.88316E-22 | 201            | 62             | 112         |
| regeneration                                                | 1.18736E-20 | 196            | 65             | 97          |
| positive regulation of angiogenesis                         | 1.40747E-19 | 93             | 23             | 42          |
| negative regulation of mitotic cell cycle                   | 1.53698E-19 | 69             | 14             | 18          |
| negative regulation of kinase activity                      | 1.7131E-19  | 157            | 42             | 91          |
| organ regeneration                                          | 5.65507E-19 | 111            | 32             | 47          |
| mitochondrion organization                                  | 2.97981E-18 | 173            | 55             | 126         |
| regulation of angiogenesis                                  | 5.99756E-18 | 123            | 39             | 78          |
| regulation of myeloid cell differentiation                  | 2.23909E-17 | 147            | 43             | 86          |
| regulation of smooth muscle cell proliferation              | 2.30082E-17 | 116            | 27             | 47          |
| placenta development                                        | 2.36348E-17 | 147            | 55             | 98          |
| negative regulation of cell migration                       | 3.48142E-17 | 141            | 33             | 59          |
| negative regulation of intracellular protein kinase cascade | 1.01632E-15 | 94             | 27             | 45          |

**Table S2, Uhlenhaut et al.**

**Table S2A:**

**Genes differentially expressed in macrophages treated with LPS+Dex (compared to LPS alone)**

| <b>Feature</b> | <b>F.C.</b> | <b>Gene</b>          | <b>Description</b>                                                      |
|----------------|-------------|----------------------|-------------------------------------------------------------------------|
| ILMN_2711910   | 0.17        | <b>Ifnb1</b>         | interferon beta 1, fibroblast                                           |
| ILMN_1225909   | 0.20        | <b>Pnliprp1</b>      | pancreatic lipase related protein 1                                     |
| ILMN_2835117   | 0.24        | <b>Ccl7</b>          | chemokine (C-C motif) ligand 7                                          |
| ILMN_1219869   | 0.24        | <b>Il15</b>          | interleukin 15                                                          |
| ILMN_2737685   | 0.25        | <b>Mmp13</b>         | matrix metalloproteinase 13                                             |
| ILMN_1245710   | 0.25        | <b>Ccl2</b>          | chemokine (C-C motif) ligand 2                                          |
| ILMN_2685393   | 0.26        | <b>Ccr5</b>          | chemokine (C-C motif) receptor 5                                        |
| ILMN_2702303   | 0.26        | <b>Ch25h</b>         | cholesterol 25-hydroxylase                                              |
| ILMN_1249336   | 0.27        | <b>Mmp13</b>         | matrix metalloproteinase 13                                             |
| ILMN_1221750   | 0.29        | <b>Mycl1</b>         | v-myc myelocytomatosis viral oncogene homolog 1, lung carcinoma derived |
| ILMN_2999439   | 0.29        | <b>Klf4</b>          | Kruppel-like factor 4 (gut)                                             |
| ILMN_2926842   | 0.30        | <b>Frt2</b>          | fibronectin leucine rich transmembrane protein 2                        |
| ILMN_3154691   | 0.31        | <b>Sirpb1a</b>       | signal-regulatory protein beta 1A                                       |
| ILMN_2707870   | 0.31        | <b>Mx1</b>           | myxovirus (influenza virus) resistance 1                                |
| ILMN_1233172   | 0.31        | <b>Pou3f1</b>        | POU domain, class 3, transcription factor 1                             |
| ILMN_3072427   | 0.31        | <b>Il1rn</b>         | interleukin 1 receptor antagonist                                       |
| ILMN_2938704   | 0.31        | <b>Il15</b>          | interleukin 15                                                          |
| ILMN_2685392   | 0.32        | <b>Ccr5</b>          | chemokine (C-C motif) receptor 5                                        |
| ILMN_1212702   | 0.32        | <b>Hba-a1</b>        | hemoglobin alpha, adult chain 1                                         |
| ILMN_1229813   | 0.33        | <b>Krt16</b>         | keratin 16                                                              |
| ILMN_2708203   | 0.33        | <b>Cdkn1c</b>        | cyclin-dependent kinase inhibitor 1C (P57)                              |
| ILMN_1377919   | 0.34        | <b>Tubb2b</b>        | tubulin, beta 2B                                                        |
| ILMN_2597769   | 0.35        | <b>Igf2</b>          | insulin-like growth factor 2                                            |
| ILMN_2598622   | 0.35        | <b>Slamf8</b>        | SLAM family member 8                                                    |
| ILMN_3047389   | 0.36        | <b>Gbp2</b>          | guanylate binding protein 2                                             |
| ILMN_1260448   | 0.36        | <b>Plk2</b>          | polo-like kinase 2 (Drosophila)                                         |
| ILMN_2621448   | 0.36        | <b>Adh7</b>          | alcohol dehydrogenase 7 (class IV), mu or sigma polypeptide             |
| ILMN_1230458   | 0.36        | <b>Ifit3</b>         | interferon-induced protein with tetratricopeptide repeats 3             |
| ILMN_1241903   | 0.36        | <b>Klf4</b>          | Kruppel-like factor 4 (gut)                                             |
| ILMN_2897891   | 0.37        | <b>Rgs1</b>          | regulator of G-protein signaling 1                                      |
| ILMN_2743244   | 0.37        | <b>Cd86</b>          | CD86 antigen                                                            |
| ILMN_2623983   | 0.37        | <b>Egr2</b>          | early growth response 2                                                 |
| ILMN_2663249   | 0.38        | <b>Slamf9</b>        | SLAM family member 9                                                    |
| ILMN_2804166   | 0.38        | <b>Igsf9</b>         | immunoglobulin superfamily, member 9                                    |
| ILMN_3151270   | 0.38        | <b>Il1rn</b>         | interleukin 1 receptor antagonist                                       |
| ILMN_3162407   | 0.38        | <b>Zfp36</b>         | zinc finger protein 36                                                  |
| ILMN_2847437   | 0.39        | <b>A430084P05Rik</b> | RIKEN cDNA A430084P05 gene                                              |
| ILMN_1243601   | 0.39        | <b>Il6</b>           | interleukin 6                                                           |
| ILMN_2610234   | 0.39        | <b>Il15</b>          | interleukin 15                                                          |

|              |      |                      |                                                                                              |
|--------------|------|----------------------|----------------------------------------------------------------------------------------------|
| ILMN_2735615 | 0.39 | <b>Isg20</b>         | interferon-stimulated protein                                                                |
| ILMN_2868220 | 0.39 | <b>Inhba</b>         | inhibin beta-A                                                                               |
| ILMN_2722380 | 0.40 | <b>Oasl1</b>         | 2'-5' oligoadenylate synthetase-like 1                                                       |
| ILMN_2677634 | 0.40 | <b>Clic5</b>         | chloride intracellular channel 5                                                             |
| ILMN_3142296 | 0.40 | <b>Klri1</b>         | killer cell lectin-like receptor family I member 1                                           |
| ILMN_2696491 | 0.40 | <b>Phf11</b>         | PHD finger protein 11                                                                        |
| ILMN_1246194 | 0.41 | <b>I830012O16Rik</b> | RIKEN cDNA I830012O16 gene                                                                   |
| ILMN_2596596 | 0.41 | <b>Rgs1</b>          | regulator of G-protein signaling 1                                                           |
| ILMN_2843286 | 0.42 | <b>Slc28a2</b>       | solute carrier family 28 (sodium-coupled nucleoside transporter), member 2                   |
| ILMN_2662926 | 0.42 | <b>Egr1</b>          | early growth response 1                                                                      |
| ILMN_2436146 | 0.42 | <b>Tnfsf10</b>       | tumor necrosis factor (ligand) superfamily, member 10                                        |
| ILMN_1227018 | 0.42 | <b>Il1a</b>          | interleukin 1 alpha                                                                          |
| ILMN_2829594 | 0.42 | <b>Hspa1a</b>        | heat shock protein 1A                                                                        |
| ILMN_1216386 | 0.42 | <b>Cd86</b>          | CD86 antigen                                                                                 |
| ILMN_2888191 | 0.42 | <b>Ccr5</b>          | chemokine (C-C motif) receptor 5                                                             |
| ILMN_1253874 | 0.42 | <b>Serpib2</b>       | serine (or cysteine) peptidase inhibitor, clade B, member 2                                  |
| ILMN_1239219 | 0.42 | <b>Mx2</b>           | myxovirus (influenza virus) resistance 2                                                     |
| ILMN_2979237 | 0.43 | <b>Gsta1</b>         | glutathione S-transferase, alpha 1 (Ya)                                                      |
| ILMN_2959291 | 0.43 | <b>Upp1</b>          | uridine phosphorylase 1                                                                      |
| ILMN_2619408 | 0.43 | <b>Atf3</b>          | activating transcription factor 3                                                            |
| ILMN_1218240 | 0.43 | <b>Cd69</b>          | CD69 antigen                                                                                 |
| ILMN_1231600 | 0.43 | <b>Ptgs2</b>         | prostaglandin-endoperoxide synthase 2                                                        |
| ILMN_3054914 | 0.44 | <b>Usp18</b>         | ubiquitin specific peptidase 18                                                              |
| ILMN_2746681 | 0.44 | <b>BC013712</b>      | cDNA sequence BC013712                                                                       |
| ILMN_2981167 | 0.44 | <b>Ifit2</b>         | interferon-induced protein with tetratricopeptide repeats 2                                  |
| ILMN_2917471 | 0.45 | <b>Ednrb</b>         | endothelin receptor type B                                                                   |
| ILMN_3159720 | 0.45 | <b>Rin2</b>          | Ras and Rab interactor 2                                                                     |
| ILMN_2663196 | 0.45 | <b>Rin2</b>          | Ras and Rab interactor 2                                                                     |
| ILMN_1240864 | 0.45 | <b>Cmpk2</b>         | cytidine monophosphate (UMP-CMP) kinase 2, mitochondrial                                     |
| ILMN_2596917 | 0.46 | <b>LOC100044475</b>  | similar to SH2/SH3 adaptor protein                                                           |
| ILMN_2905717 | 0.46 | <b>Cd180</b>         | CD180 antigen                                                                                |
| ILMN_2654754 | 0.46 | <b>Pdpn</b>          | podoplanin                                                                                   |
| ILMN_3142299 | 0.46 | <b>Klri1</b>         | killer cell lectin-like receptor family I member 1                                           |
| ILMN_2502136 | 0.46 | <b>Cd40</b>          | CD40 antigen                                                                                 |
| ILMN_1243826 | 0.46 | <b>Plekha4</b>       | pleckstrin homology domain containing, family A (phosphoinositide binding specific) member 4 |
| ILMN_1256257 | 0.46 | <b>Isg15</b>         | ISG15 ubiquitin-like modifier                                                                |
| ILMN_1256089 | 0.46 | <b>Rasgef1b</b>      | RasGEF domain family, member 1B                                                              |
| ILMN_3162887 | 0.47 | <b>Sp140</b>         | Sp140 nuclear body protein                                                                   |
| ILMN_2639018 | 0.47 | <b>Cav2</b>          | caveolin 2                                                                                   |
| ILMN_2622856 | 0.47 | <b>Apol9b</b>        | apolipoprotein L 9b                                                                          |
| ILMN_2771766 | 0.47 | <b>Ccl12</b>         | chemokine (C-C motif) ligand 12                                                              |
| ILMN_3161805 | 0.47 | <b>Ccl12</b>         | chemokine (C-C motif) ligand 12                                                              |
| ILMN_2778655 | 0.47 | <b>Vcam1</b>         | vascular cell adhesion molecule 1                                                            |
| ILMN_2943699 | 0.47 | <b>Vrk2</b>          | vaccinia related kinase 2                                                                    |
| ILMN_3162671 | 0.48 | <b>Gm5431</b>        | predicted gene 5431                                                                          |
| ILMN_2696492 | 0.48 | <b>Phf11</b>         | PHD finger protein 11                                                                        |
| ILMN_2818717 | 0.48 | <b>Aftph</b>         | aftiphilin                                                                                   |
| ILMN_2903945 | 0.48 | <b>Gadd45g</b>       | growth arrest and DNA-damage-inducible 45 gamma                                              |

|              |      |                      |                                                             |
|--------------|------|----------------------|-------------------------------------------------------------|
| ILMN_2750740 | 0.48 | <b>LOC100048721</b>  | similar to fibronectin leucine rich transmembrane protein 3 |
| ILMN_1235032 | 0.48 | <b>Wdr20b</b>        | WD repeat domain 20b                                        |
| ILMN_2717366 | 0.49 | <b>Oasl1</b>         | 2'-5' oligoadenylate synthetase-like 1                      |
| ILMN_2726905 | 0.49 | <b>Gnb4</b>          | guanine nucleotide binding protein (G protein), beta 4      |
| ILMN_2793464 | 0.49 | <b>Oasl1</b>         | 2'-5' oligoadenylate synthetase-like 1                      |
| ILMN_2717176 | 0.49 | <b>Rgl1</b>          | ral guanine nucleotide dissociation stimulator,-like 1      |
| ILMN_1234137 | 0.49 | <b>A530023O14Rik</b> | RIKEN cDNA A530023O14 gene                                  |
| ILMN_2789762 | 0.49 | <b>Fam3b</b>         | family with sequence similarity 3, member B                 |
| ILMN_2589640 | 0.50 | <b>Ednrb</b>         | endothelin receptor type B                                  |
| ILMN_1229680 | 0.50 | <b>Flrt3</b>         | fibronectin leucine rich transmembrane protein 3            |
| ILMN_2919411 | 0.50 | <b>Osm</b>           | oncostatin M                                                |
| ILMN_2491202 | 0.50 | <b>Vnn3</b>          | vanin 3                                                     |
| ILMN_3010089 | 0.50 | <b>Ifi204</b>        | interferon activated gene 204                               |
| ILMN_2653132 | 0.51 | <b>Clec7a</b>        | C-type lectin domain family 7, member a                     |
| ILMN_2649068 | 0.51 | <b>Irf1</b>          | interferon regulatory factor 1                              |
| ILMN_3097131 | 0.51 | <b>Timeless</b>      | timeless homolog (Drosophila)                               |
| ILMN_3160750 | 0.51 | <b>AA467197</b>      | expressed sequence AA467197                                 |
| ILMN_2603647 | 0.51 | <b>Clec2d</b>        | C-type lectin domain family 2, member d                     |
| ILMN_2981169 | 0.51 | <b>Ifit2</b>         | interferon-induced protein with tetratricopeptide repeats 2 |
| ILMN_2937320 | 0.52 | <b>Schip1</b>        | schwannomin interacting protein 1                           |
| ILMN_1249864 | 0.52 | <b>Fam26f</b>        | family with sequence similarity 26, member F                |
| ILMN_2664491 | 0.52 | <b>Snx2</b>          | sorting nexin 2                                             |
| ILMN_2706462 | 0.52 | <b>Il12a</b>         | interleukin 12a                                             |
| ILMN_2819841 | 0.52 | <b>Rpl7a</b>         | ribosomal protein L7A                                       |
| ILMN_2632942 | 0.52 | <b>Sumo1</b>         | SMT3 suppressor of mif two 3 homolog 1 (yeast)              |
| ILMN_2503129 | 0.52 | <b>Cd40</b>          | CD40 antigen                                                |
| ILMN_2597030 | 0.53 | <b>Smox</b>          | spermine oxidase                                            |
| ILMN_1239808 | 0.53 | <b>Lysmd2</b>        | LysM, putative peptidoglycan-binding, domain containing 2   |
| ILMN_1260378 | 0.53 | <b>Csrp1</b>         | cysteine and glycine-rich protein 1                         |
| ILMN_2959293 | 0.53 | <b>Upp1</b>          | uridine phosphorylase 1                                     |
| ILMN_1243593 | 0.53 | <b>Pcgf5</b>         | polycomb group ring finger 5                                |
| ILMN_1217133 | 0.53 | <b>Gstt4</b>         | glutathione S-transferase, theta 4                          |
| ILMN_2642913 | 0.53 | <b>Emp1</b>          | epithelial membrane protein 1                               |
| ILMN_2974720 | 0.53 | <b>Igf2bp2</b>       | insulin-like growth factor 2 binding protein 2              |
| ILMN_3142257 | 0.53 | <b>Mtus1</b>         | mitochondrial tumor suppressor 1                            |
| ILMN_2944413 | 0.53 | <b>Akap7</b>         | A kinase (PRKA) anchor protein 7                            |
| ILMN_3096144 | 0.53 | <b>Stat3</b>         | signal transducer and activator of transcription 3          |
| ILMN_2603081 | 0.54 | <b>Nt5c3</b>         | 5'-nucleotidase, cytosolic III                              |
| ILMN_2904117 | 0.54 | <b>Six1</b>          | sine oculis-related homeobox 1 homolog (Drosophila)         |
| ILMN_3075340 | 0.54 | <b>P2ry14</b>        | purinergic receptor P2Y, G-protein coupled, 14              |
| ILMN_2827780 | 0.54 | <b>D14Ertd668e</b>   | DNA segment, Chr 14, ERATO Doi 668, expressed               |
| ILMN_2754158 | 0.54 | <b>Tgtp1</b>         | T-cell specific GTPase 1                                    |
| ILMN_2636403 | 0.54 | <b>Csrnp1</b>        | cysteine-serine-rich nuclear protein 1                      |
| ILMN_2707865 | 0.54 | <b>Epsti1</b>        | epithelial stromal interaction 1 (breast)                   |
| ILMN_2590884 | 0.54 | <b>Plaur</b>         | plasminogen activator, urokinase receptor                   |
| ILMN_2648548 | 0.54 | <b>Casp7</b>         | caspase 7                                                   |
| ILMN_2649067 | 0.54 | <b>Irf1</b>          | interferon regulatory factor 1                              |
| ILMN_2621021 | 0.55 | <b>Ptpn14</b>        | protein tyrosine phosphatase, non-receptor type 14          |



|              |      |                      |                                                                               |
|--------------|------|----------------------|-------------------------------------------------------------------------------|
| ILMN_3160770 | 0.55 | <b>Cd200</b>         | CD200 antigen                                                                 |
| ILMN_1236059 | 0.55 | <b>Stat4</b>         | signal transducer and activator of transcription 4                            |
| ILMN_2625377 | 0.55 | <b>Rgs1</b>          | regulator of G-protein signaling 1                                            |
| ILMN_2987487 | 0.55 | <b>Tmem171</b>       | transmembrane protein 171                                                     |
| ILMN_2726371 | 0.55 | <b>Nqo1</b>          | NAD(P)H dehydrogenase, quinone 1                                              |
| ILMN_2783223 | 0.55 | <b>Iigp1b</b>        | interferon inducible GTPase 1B                                                |
| ILMN_1217041 | 0.55 | <b>Cd86</b>          | CD86 antigen                                                                  |
| ILMN_2603636 | 0.55 | <b>Sirpb1a</b>       | signal-regulatory protein beta 1A                                             |
| ILMN_1247704 | 0.55 | <b>Hmgn3</b>         | high mobility group nucleosomal binding domain 3                              |
| ILMN_2719803 | 0.55 | <b>Stap1</b>         | signal transducing adaptor family member 1                                    |
| ILMN_2834777 | 0.56 | <b>Irf1</b>          | interferon regulatory factor 1                                                |
| ILMN_1230157 | 0.56 | <b>Rnd3</b>          | Rho family GTPase 3                                                           |
| ILMN_1228165 | 0.56 | <b>Tbc1d9</b>        | TBC1 domain family, member 9                                                  |
| ILMN_2642339 | 0.56 | <b>Slc1a2</b>        | solute carrier family 1 (glial high affinity glutamate transporter), member 2 |
| ILMN_2647594 | 0.56 | <b>Igf1</b>          | insulin-like growth factor 1                                                  |
| ILMN_2865016 | 0.56 | <b>Cd83</b>          | CD83 antigen                                                                  |
| ILMN_1217786 | 0.56 | <b>Epsti1</b>        | epithelial stromal interaction 1 (breast)                                     |
| ILMN_2848163 | 0.56 | <b>Rilpl1</b>        | Rab interacting lysosomal protein-like 1                                      |
| ILMN_2632940 | 0.56 | <b>Sumo1</b>         | SMT3 suppressor of mif two 3 homolog 1 (yeast)                                |
| ILMN_3155492 | 0.56 | <b>Tapbp</b>         | TAP binding protein                                                           |
| ILMN_3115796 | 0.56 | <b>Cd40</b>          | CD40 antigen                                                                  |
| ILMN_2735350 | 0.56 | <b>Gdf15</b>         | growth differentiation factor 15                                              |
| ILMN_1224883 | 0.57 | <b>Slc30a1</b>       | solute carrier family 30 (zinc transporter), member 1                         |
| ILMN_2899863 | 0.57 | <b>Tnf</b>           | tumor necrosis factor                                                         |
| ILMN_2730463 | 0.57 | <b>Cdt1</b>          | chromatin licensing and DNA replication factor 1                              |
| ILMN_2841024 | 0.57 | <b>Pnpla1</b>        | patatin-like phospholipase domain containing 1                                |
| ILMN_1247267 | 0.57 | <b>Smox</b>          | spermine oxidase                                                              |
| ILMN_2944666 | 0.58 | <b>Ifit3</b>         | interferon-induced protein with tetratricopeptide repeats 3                   |
| ILMN_3035162 | 0.58 | <b>Sgk3</b>          | serum/glucocorticoid regulated kinase 3                                       |
| ILMN_2671266 | 0.58 | <b>Fam116b</b>       | family with sequence similarity 116, member B                                 |
| ILMN_1245200 | 0.58 | <b>Ifi205</b>        | interferon activated gene 205                                                 |
| ILMN_3138732 | 0.58 | <b>Nrap</b>          | nebulin-related anchoring protein                                             |
| ILMN_2663258 | 0.58 | <b>Clec7a</b>        | C-type lectin domain family 7, member a                                       |
| ILMN_1226800 | 0.58 | <b>Cd274</b>         | CD274 antigen                                                                 |
| ILMN_2630993 | 0.58 | <b>Ppap2b</b>        | phosphatidic acid phosphatase type 2B                                         |
| ILMN_2747651 | 0.58 | <b>Hat1</b>          | histone aminotransferase 1                                                    |
| ILMN_2887630 | 0.58 | <b>Fabp3</b>         | fatty acid binding protein 3, muscle and heart                                |
| ILMN_2684848 | 0.58 | <b>D14Ert668e</b>    | DNA segment, Chr 14, ERATO Doi 668, expressed                                 |
| ILMN_2780247 | 0.58 | <b>Lta</b>           | lymphotoxin A                                                                 |
| ILMN_2926198 | 0.58 | <b>2310016C08Rik</b> | RIKEN cDNA 2310016C08 gene                                                    |
| ILMN_1244479 | 0.58 | <b>Vnn3</b>          | vanin 3                                                                       |
| ILMN_2671320 | 0.58 | <b>Il23a</b>         | interleukin 23, alpha subunit p19                                             |
| ILMN_2599782 | 0.58 | <b>Irf1</b>          | interferon regulatory factor 1                                                |
| ILMN_3006767 | 0.58 | <b>Mikl</b>          | mixed lineage kinase domain-like                                              |
| ILMN_3131679 | 0.59 | <b>Usp18</b>         | ubiquitin specific peptidase 18                                               |
| ILMN_2700166 | 0.59 | <b>Ccnd2</b>         | cyclin D2                                                                     |
| ILMN_1234539 | 0.59 | <b>Irgm1</b>         | immunity-related GTPase family M member 1                                     |
| ILMN_1238486 | 0.59 | <b>Ctsc</b>          | cathepsin C                                                                   |

|              |      |                      |                                                                                |
|--------------|------|----------------------|--------------------------------------------------------------------------------|
| ILMN_1240125 | 0.59 | <b>Gnb4</b>          | guanine nucleotide binding protein (G protein), beta 4                         |
| ILMN_1221264 | 0.59 | <b>Klf4</b>          | Kruppel-like factor 4 (gut) (Klf4)                                             |
| ILMN_1239221 | 0.59 | <b>2310016C08Rik</b> | RIKEN cDNA 2310016C08 gene                                                     |
| ILMN_2845658 | 0.59 | <b>LOC625360</b>     | 2-cell-stage, variable group, member 3-like                                    |
| ILMN_1219200 | 0.59 | <b>P2ry14</b>        | purinergic receptor P2Y, G-protein coupled, 14                                 |
| ILMN_2614970 | 0.59 | <b>Stat4</b>         | signal transducer and activator of transcription 4                             |
| ILMN_2855315 | 0.59 | <b>Hist1h1c</b>      | histone cluster 1, H1c                                                         |
| ILMN_2811154 | 0.59 | <b>Cxcl2</b>         | chemokine (C-X-C motif) ligand 2                                               |
| ILMN_1244866 | 0.59 | <b>Gbp5</b>          | guanylate binding protein 5                                                    |
| ILMN_2588051 | 0.59 | <b>Tubb2b</b>        | tubulin, beta 2B                                                               |
| ILMN_1214750 | 0.59 | <b>Kynu</b>          | kynureninase (L-kynurenine hydrolase)                                          |
| ILMN_1229523 | 0.59 | <b>Fcgr1</b>         | Fc receptor, IgG, high affinity I                                              |
| ILMN_2762380 | 0.60 | <b>Enpp4</b>         | ectonucleotide pyrophosphatase/phosphodiesterase 4                             |
| ILMN_2814974 | 0.60 | <b>Klra2</b>         | killer cell lectin-like receptor, subfamily A, member 2                        |
| ILMN_3161263 | 0.60 | <b>Fzd5</b>          | frizzled homolog 5 (Drosophila)                                                |
| ILMN_2629375 | 0.60 | <b>1110038F14Rik</b> | RIKEN cDNA 1110038F14 gene                                                     |
| ILMN_2906728 | 0.60 | <b>H19</b>           | H19 fetal liver (H19) on chromosome 7                                          |
| ILMN_2433990 | 0.60 | <b>LOC100048346</b>  | similar to ubiquitin specific protease UBP43                                   |
| ILMN_2850753 | 0.60 | <b>Mdm2</b>          | transformed mouse 3T3 cell double minute 2                                     |
| ILMN_2904321 | 0.60 | <b>Akt3</b>          | thymoma viral proto-oncogene 3                                                 |
| ILMN_2626939 | 0.60 | <b>Daxx</b>          | Fas death domain-associated protein                                            |
| ILMN_1216764 | 0.60 | <b>Ier3</b>          | immediate early response 3                                                     |
| ILMN_2634970 | 0.60 | <b>Ripk2</b>         | receptor (TNFRSF)-interacting serine-threonine kinase 2                        |
| ILMN_1247710 | 0.60 | <b>Nod1</b>          | nucleotide-binding oligomerization domain containing 1                         |
| ILMN_2630045 | 0.60 | <b>Il27</b>          | interleukin 27                                                                 |
| ILMN_2593554 | 0.60 | <b>Igtp</b>          | interferon gamma induced GTPase                                                |
| ILMN_2644719 | 0.61 | <b>Hmgn3</b>         | high mobility group nucleosomal binding domain 3                               |
| ILMN_2741445 | 0.61 | <b>AA960436</b>      | expressed sequence AA960436                                                    |
| ILMN_1236693 | 0.61 | <b>Bfar</b>          | bifunctional apoptosis regulator                                               |
| ILMN_3006790 | 0.61 | <b>Hpse</b>          | heparanase                                                                     |
| ILMN_1234774 | 0.61 | <b>2010005H15Rik</b> | RIKEN cDNA 2010005H15 gene                                                     |
| ILMN_3066763 | 0.61 | <b>Arl4a</b>         | ADP-ribosylation factor-like 4A                                                |
| ILMN_2628174 | 0.61 | <b>Acss1</b>         | acyl-CoA synthetase short-chain family member 1                                |
| ILMN_1254113 | 0.61 | <b>Snx2</b>          | sorting nexin 2                                                                |
| ILMN_2624100 | 0.61 | <b>Irf1</b>          | interferon regulatory factor 1                                                 |
| ILMN_2725188 | 0.61 | <b>Atp10a</b>        | ATPase, class V, type 10A                                                      |
| ILMN_2780392 | 0.61 | <b>Slc7a8</b>        | solute carrier family 7 (cationic amino acid transporter, y+ system), member 8 |
| ILMN_1229939 | 0.61 | <b>A530064D06Rik</b> | RIKEN cDNA A530064D06 gene (A530064D06Rik)                                     |
| ILMN_2478101 | 0.61 | <b>LOC100047963</b>  | similar to ADIR1                                                               |
| ILMN_1228453 | 0.61 | <b>Setdb2</b>        | SET domain, bifurcated 2                                                       |
| ILMN_2747923 | 0.61 | <b>Slc40a1</b>       | solute carrier family 40 (iron-regulated transporter), member 1                |
| ILMN_1244829 | 0.62 | <b>Hap1</b>          | huntingtin-associated protein 1                                                |
| ILMN_1212938 | 0.62 | <b>Aif1</b>          | allograft inflammatory factor 1                                                |
| ILMN_3160771 | 0.62 | <b>Cd200</b>         | CD200 antigen                                                                  |
| ILMN_2493067 | 0.62 | <b>Zranb3</b>        | zinc finger, RAN-binding domain containing 3                                   |
| ILMN_3161790 | 0.62 | <b>Nlrc5</b>         | NLR family, CARD domain containing 5                                           |
| ILMN_2904658 | 0.62 | <b>Procr</b>         | protein C receptor, endothelial                                                |
| ILMN_2688306 | 0.62 | <b>Rbl1</b>          | retinoblastoma-like 1 (p107)                                                   |

|              |      |                      |                                                               |
|--------------|------|----------------------|---------------------------------------------------------------|
| ILMN_3049896 | 0.62 | <b>Evi2b</b>         | ecotropic viral integration site 2b                           |
| ILMN_2638491 | 0.62 | <b>Slamf7</b>        | SLAM family member 7                                          |
| ILMN_2706803 | 0.62 | <b>Crif3</b>         | cytokine receptor-like factor 3                               |
| ILMN_2711172 | 0.62 | <b>Irgm1</b>         | immunity-related GTPase family M member 1                     |
| ILMN_2940510 | 0.62 | <b>Tlk2</b>          | tousled-like kinase 2 (Arabidopsis)                           |
| ILMN_2651715 | 0.62 | <b>Axl</b>           | AXL receptor tyrosine kinase                                  |
| ILMN_2632665 | 0.62 | <b>Cav1</b>          | caveolin 1, caveolae protein                                  |
| ILMN_2731057 | 0.62 | <b>Psme2</b>         | proteasome (prosome, macropain) 28 subunit, beta              |
| ILMN_2652511 | 0.62 | <b>Hist1h2bj</b>     | histone cluster 1, H2bj                                       |
| ILMN_2519676 | 0.62 | <b>Triobp</b>        | TRIO and F-actin binding protein                              |
| ILMN_2998303 | 0.62 | <b>Katna1</b>        | katanin p60 (ATPase-containing) subunit A1                    |
| ILMN_1238069 | 0.62 | <b>4930539E08Rik</b> | RIKEN cDNA 4930539E08 gene (4930539E08Rik)                    |
| ILMN_3008859 | 0.63 | <b>Ctsc</b>          | cathepsin C                                                   |
| ILMN_3052430 | 0.63 | <b>Cd63</b>          | CD63 antigen                                                  |
| ILMN_1223499 | 0.63 | <b>Nos2</b>          | nitric oxide synthase 2, inducible                            |
| ILMN_2628822 | 0.63 | <b>Oas1g</b>         | 2'-5' oligoadenylate synthetase 1G                            |
| ILMN_3071764 | 0.63 | <b>Fam82a2</b>       | family with sequence similarity 82, member A2                 |
| ILMN_2719498 | 0.63 | <b>Mar5</b>          | membrane-associated ring finger (C3HC4) 5                     |
| ILMN_2965903 | 0.63 | <b>Hdc</b>           | histidine decarboxylase                                       |
| ILMN_1230019 | 0.63 | <b>Uba7</b>          | ubiquitin-like modifier activating enzyme 7                   |
| ILMN_3142803 | 0.63 | <b>Cxcl10</b>        | chemokine (C-X-C motif) ligand 10                             |
| ILMN_1230357 | 0.63 | <b>Itpr1</b>         | inositol 1,4,5-triphosphate receptor 1                        |
| ILMN_2776681 | 0.63 | <b>Dusp28</b>        | dual specificity phosphatase 28                               |
| ILMN_3042112 | 0.63 | <b>Gpr137b</b>       | G protein-coupled receptor 137B                               |
| ILMN_3122961 | 0.63 | <b>Gbp2</b>          | guanylate binding protein 2                                   |
| ILMN_1239843 | 0.63 | <b>Clecsf12</b>      | C-type lectin domain family 7, member a                       |
| ILMN_3120510 | 0.63 | <b>Gvin1</b>         | GTPase, very large interferon inducible 1                     |
| ILMN_1224754 | 0.63 | <b>Ckb</b>           | creatine kinase, brain                                        |
| ILMN_2915279 | 0.63 | <b>Mov10</b>         | Moloney leukemia virus 10                                     |
| ILMN_1248849 | 0.63 | <b>Gsta2</b>         | glutathione S-transferase, alpha 2 (Yc2)                      |
| ILMN_2624854 | 0.63 | <b>Gstm2</b>         | glutathione S-transferase, mu 2                               |
| ILMN_1236609 | 0.63 | <b>Gp49a</b>         | glycoprotein 49 A                                             |
| ILMN_2744890 | 0.63 | <b>Gadd45g</b>       | growth arrest and DNA-damage-inducible 45 gamma               |
| ILMN_2416145 | 0.63 | <b>Tpx2</b>          | TPX2, microtubule-associated protein homolog (Xenopus laevis) |
| ILMN_1230287 | 0.64 | <b>Cd300ld</b>       | CD300 molecule-like family member d                           |
| ILMN_2834294 | 0.64 | <b>Tmem229b</b>      | transmembrane protein 229B                                    |
| ILMN_3008858 | 0.64 | <b>Ctsc</b>          | cathepsin C                                                   |
| ILMN_3139158 | 0.64 | <b>Trim21</b>        | tripartite motif-containing 21                                |
| ILMN_1249727 | 0.64 | <b>Car13</b>         | carbonic anhydrase 13                                         |
| ILMN_1247592 | 0.64 | <b>Casp1</b>         | caspase 1                                                     |
| ILMN_2702628 | 0.64 | <b>2900002H16Rik</b> | RIKEN cDNA 2900002H16 gene (2900002H16Rik)                    |
| ILMN_2936118 | 0.64 | <b>Rpl24</b>         | ribosomal protein L24                                         |
| ILMN_1230143 | 0.64 | <b>Batf2</b>         | basic leucine zipper transcription factor, ATF-like 2         |
| ILMN_1230765 | 0.64 | <b>Tpst1</b>         | protein-tyrosine sulfotransferase 1                           |
| ILMN_1232716 | 0.64 | <b>Cyp1b1</b>        | cytochrome P450, family 1, subfamily b, polypeptide 1         |
| ILMN_1214183 | 0.64 | <b>A530064D06Rik</b> | RIKEN cDNA A530064D06 gene (A530064D06Rik)                    |
| ILMN_2989706 | 0.64 | <b>Prdx1</b>         | peroxiredoxin 1                                               |
| ILMN_2820379 | 0.64 | <b>Rnf135</b>        | ring finger protein 135                                       |

|              |      |                      |                                                                                             |
|--------------|------|----------------------|---------------------------------------------------------------------------------------------|
| ILMN_2804487 | 0.64 | <b>Aif1</b>          | allograft inflammatory factor 1                                                             |
| ILMN_1257020 | 0.64 | <b>Aldh1b1</b>       | aldehyde dehydrogenase 1 family, member B1                                                  |
| ILMN_2698046 | 0.64 | <b>Stat3</b>         | signal transducer and activator of transcription 3                                          |
| ILMN_3161253 | 0.64 | <b>Shisa3</b>        | shisa homolog 3 ( <i>Xenopus laevis</i> )                                                   |
| ILMN_1259290 | 0.64 | <b>Akt3</b>          | thymoma viral proto-oncogene 3                                                              |
| ILMN_2732996 | 0.64 | <b>Gpr68</b>         | G protein-coupled receptor 68                                                               |
| ILMN_3072407 | 0.64 | <b>BC094916</b>      | cDNA sequence BC094916 (BC094916)                                                           |
| ILMN_3116885 | 0.65 | <b>Gpr137b</b>       | G protein-coupled receptor 137B                                                             |
| ILMN_2702406 | 0.65 | <b>Pim1</b>          | proviral integration site 1 (Pim1)                                                          |
| ILMN_3149944 | 0.65 | <b>Cklf</b>          | chemokine-like factor                                                                       |
| ILMN_2686087 | 0.65 | <b>Cutc</b>          | cutC copper transporter homolog ( <i>E.coli</i> )                                           |
| ILMN_3006505 | 0.65 | <b>Bcl2a1d</b>       | B-cell leukemia/lymphoma 2 related protein A1d                                              |
| ILMN_2496288 | 0.65 | <b>Cd40</b>          | CD40 antigen                                                                                |
| ILMN_1232041 | 0.65 | <b>Klf6</b>          | Kruppel-like factor 6                                                                       |
| ILMN_1247347 | 0.65 | <b>Gcg</b>           | glucagon                                                                                    |
| ILMN_2746842 | 0.65 | <b>Mgat4a</b>        | mannoside acetylglucosaminyltransferase 4, isoenzyme A                                      |
| ILMN_3151243 | 0.65 | <b>BC094916</b>      | cDNA sequence BC094916                                                                      |
| ILMN_2689062 | 0.65 | <b>Mtmr14</b>        | myotubularin related protein 14                                                             |
| ILMN_2677772 | 0.65 | <b>Srxn1</b>         | sulfiredoxin 1 homolog ( <i>S. cerevisiae</i> )                                             |
| ILMN_2661005 | 0.65 | <b>1110018G07Rik</b> | RIKEN cDNA 1110018G07 gene                                                                  |
| ILMN_1249863 | 0.65 | <b>Slamf1</b>        | signaling lymphocytic activation molecule family member 1                                   |
| ILMN_3163347 | 0.66 | <b>Mtus1</b>         | mitochondrial tumor suppressor 1 (Mtus1)                                                    |
| ILMN_2946672 | 0.66 | <b>2310014L17Rik</b> | RIKEN cDNA 2310014L17 gene (2310014L17Rik)                                                  |
| ILMN_3161013 | 0.66 | <b>Hk3</b>           | hexokinase 3                                                                                |
| ILMN_2625290 | 0.66 | <b>Ifi35</b>         | interferon-induced protein 35                                                               |
| ILMN_3158725 | 0.66 | <b>Raet1b</b>        | retinoic acid early transcript beta                                                         |
| ILMN_1229804 | 0.66 | <b>Lta</b>           | lymphotoxin A (Lta),                                                                        |
| ILMN_1220586 | 0.66 | <b>Papd4</b>         | PAP associated domain containing 4                                                          |
| ILMN_2680076 | 0.66 | <b>Ifi205</b>        | interferon activated gene 205                                                               |
| ILMN_2829646 | 0.66 | <b>Ift172</b>        | intraflagellar transport 172 homolog ( <i>Chlamydomonas</i> )                               |
| ILMN_1224472 | 0.66 | <b>Ccl4</b>          | chemokine (C-C motif) ligand 4                                                              |
| ILMN_1252757 | 0.66 | <b>Mllt3</b>         | myeloid/lymphoid or mixed lineage-leukemia translocation to 3 homolog ( <i>Drosophila</i> ) |
| ILMN_2953596 | 0.66 | <b>E2f5</b>          | E2F transcription factor 5                                                                  |
| ILMN_2959292 | 0.66 | <b>Upp1</b>          | uridine phosphorylase 1 (Upp1),                                                             |
| ILMN_1216469 | 0.66 | <b>Kcnab1</b>        | potassium voltage-gated channel, shaker-related subfamily, beta member 1                    |
| ILMN_2516157 | 0.66 | <b>Zc3hav1</b>       | zinc finger CCCH type, antiviral 1                                                          |
| ILMN_2857086 | 0.66 | <b>Tra2a</b>         | transformer 2 alpha homolog ( <i>Drosophila</i> )                                           |
| ILMN_2650475 | 0.66 | <b>Tmem178</b>       | transmembrane protein 178                                                                   |
| ILMN_1228710 | 0.66 | <b>Sec24b</b>        | Sec24 related gene family, member B ( <i>S. cerevisiae</i> )                                |
| ILMN_2620030 | 0.66 | <b>Capn2</b>         | calpain 2                                                                                   |
| ILMN_1245731 | 0.67 | <b>Hhex</b>          | hematopoietically expressed homeobox                                                        |
| ILMN_2820383 | 0.67 | <b>Rnf135</b>        | ring finger protein 135                                                                     |
| ILMN_1224768 | 0.67 | <b>Ehd4</b>          | EH-domain containing 4                                                                      |
| ILMN_2721571 | 0.67 | <b>Slamf1</b>        | signaling lymphocytic activation molecule family member 1                                   |
| ILMN_2833441 | 0.67 | <b>Trafd1</b>        | TRAF type zinc finger domain containing 1                                                   |
| ILMN_3008733 | 0.67 | <b>AA960436</b>      | expressed sequence AA960436                                                                 |
| ILMN_1225528 | 0.67 | <b>Trib3</b>         | tribbles homolog 3 ( <i>Drosophila</i> )                                                    |
| ILMN_2932787 | 0.67 | <b>BC006779</b>      | cDNA sequence BC006779                                                                      |

|              |      |                      |                                                                          |
|--------------|------|----------------------|--------------------------------------------------------------------------|
| ILMN_2790097 | 0.67 | <b>Rhoc</b>          | ras homolog gene family, member C                                        |
| ILMN_2777471 | 0.67 | <b>H2-T23</b>        | histocompatibility 2, T region locus 23                                  |
| ILMN_2460662 | 0.67 | <b>Tnfsf4</b>        | tumor necrosis factor (ligand) superfamily, member 4                     |
| ILMN_1256359 | 0.67 | <b>Smox</b>          | spermine oxidase (Smox),                                                 |
| ILMN_2492500 | 0.67 | <b>Zeb1</b>          | zinc finger E-box binding homeobox 1                                     |
| ILMN_2834370 | 0.67 | <b>Cutc</b>          | cutC copper transporter homolog (E.coli)                                 |
| ILMN_2878548 | 0.67 | <b>Mthfd2</b>        | methylenetetrahydrofolate dehydrogenase (NAD+ dependent), cyclohydrolase |
| ILMN_1248696 | 0.67 | <b>Lrrc8c</b>        | leucine rich repeat containing 8 family, member C                        |
| ILMN_2811737 | 0.67 | <b>Casp4</b>         | caspase 4, apoptosis-related cysteine peptidase                          |
| ILMN_1221288 | 0.67 | <b>Lgals8</b>        | lectin, galactose binding, soluble 8                                     |
| ILMN_2734028 | 0.67 | <b>Tank</b>          | TRAF family member-associated Nf-kappa B activator                       |
| ILMN_1244513 | 0.67 | <b>Gbp3</b>          | guanylate binding protein 3                                              |
| ILMN_2589790 | 0.67 | <b>Stat3</b>         | signal transducer and activator of transcription 3                       |
| ILMN_1215305 | 0.67 | <b>Pcaf</b>          |                                                                          |
| ILMN_2766469 | 0.67 | <b>Smox</b>          | spermine oxidase (Smox),                                                 |
| ILMN_2937735 | 0.68 | <b>Irak2</b>         | interleukin-1 receptor-associated kinase 2                               |
| ILMN_2726047 | 0.68 | <b>Rfc3</b>          | replication factor C (activator 1) 3                                     |
| ILMN_2915671 | 0.68 | <b>Kcnab1</b>        | potassium voltage-gated channel, shaker-related subfamily, beta member 1 |
| ILMN_2926480 | 0.68 | <b>Diras2</b>        | DIRAS family, GTP-binding RAS-like 2                                     |
| ILMN_1214731 | 0.68 | <b>LOC100044190</b>  | hypothetical protein LOC100044190                                        |
| ILMN_1223176 | 0.68 | <b>Magohb</b>        | mago-nashi homolog B (Drosophila)                                        |
| ILMN_2790373 | 0.68 | <b>Snn</b>           | stannin                                                                  |
| ILMN_1236517 | 0.68 | <b>Il18</b>          | interleukin 18                                                           |
| ILMN_2695149 | 0.68 | <b>Smc5</b>          | structural maintenance of chromosomes 5                                  |
| ILMN_2680398 | 0.68 | <b>Zc3h12d</b>       | zinc finger CCCH type containing 12D                                     |
| ILMN_1218617 | 0.68 | <b>Skiv2l2</b>       | superkiller viralicidic activity 2-like 2 (S. cerevisiae)                |
| ILMN_2863437 | 0.68 | <b>1110038F14Rik</b> | RIKEN cDNA 1110038F14 gene                                               |
| ILMN_2773699 | 0.68 | <b>Hgsnat</b>        | heparan-alpha-glucosaminide N-acetyltransferase                          |
| ILMN_1257520 | 0.68 | <b>Hist1h2bn</b>     | histone cluster 1, H2bn                                                  |
| ILMN_2767605 | 0.68 | <b>Lmo2</b>          | LIM domain only 2                                                        |
| ILMN_2640789 | 0.68 | <b>Sgk3</b>          | serum/glucocorticoid regulated kinase 3                                  |
| ILMN_1236702 | 0.68 | <b>Lilrb4</b>        | leukocyte immunoglobulin-like receptor, subfamily B, member 4            |
| ILMN_2590917 | 0.68 | <b>Aim1</b>          | absent in melanoma 1                                                     |
| ILMN_1250421 | 0.68 | <b>Mmp12</b>         | matrix metalloproteinase 12                                              |
| ILMN_2988143 | 0.68 | <b>Plac8</b>         | placenta-specific 8                                                      |
| ILMN_1260175 | 0.69 | <b>Golga3</b>        | golgi autoantigen, golgin subfamily a, 3                                 |
| ILMN_2617478 | 0.69 | <b>Psip1</b>         | PC4 and SFRS1 interacting protein 1                                      |
| ILMN_1216662 | 0.69 | <b>Kif5c</b>         | kinesin family member 5C                                                 |
| ILMN_2652482 | 0.69 | <b>Dfna5</b>         | deafness, autosomal dominant 5 (human)                                   |
| ILMN_3107377 | 0.69 | <b>Dnajb6</b>        | DnaJ (Hsp40) homolog, subfamily B, member 6                              |
| ILMN_1240074 | 0.69 | <b>Trim26</b>        | tripartite motif-containing 26                                           |
| ILMN_2600113 | 0.69 | <b>Gtpbp2</b>        | GTP binding protein 2                                                    |
| ILMN_2652857 | 0.69 | <b>Ifi47</b>         | interferon gamma inducible protein 47                                    |
| ILMN_1234453 | 0.69 | <b>Gm15453</b>       | predicted gene 15453                                                     |
| ILMN_2731949 | 0.69 | <b>Klf6</b>          | Kruppel-like factor 6                                                    |
| ILMN_2718330 | 0.69 | <b>Cish</b>          | cytokine inducible SH2-containing protein                                |
| ILMN_2746766 | 0.69 | <b>Ppp2r5a</b>       | protein phosphatase 2, regulatory subunit B (B56), alpha isoform         |
| ILMN_2783010 | 0.69 | <b>Snx2</b>          | sorting nexin 2                                                          |

|              |      |                      |                                                                                       |
|--------------|------|----------------------|---------------------------------------------------------------------------------------|
| ILMN_3117714 | 0.69 | <b>Rkhd2</b>         | mex3 homolog C ( <i>C. elegans</i> ) (Mex3c)                                          |
| ILMN_1237736 | 0.69 | <b>Plekhf2</b>       | pleckstrin homology domain containing, family F (with FYVE domain) member 2           |
| ILMN_1228031 | 0.69 | <b>Dusp8</b>         | dual specificity phosphatase 8                                                        |
| ILMN_2708477 | 0.69 | <b>Spink3</b>        | serine peptidase inhibitor, Kazal type 3                                              |
| ILMN_2680136 | 0.70 | <b>A430056A10Rik</b> | interferon-induced protein 44 (Ifi44)                                                 |
| ILMN_1254962 | 0.70 | <b>Mov10</b>         | Moloney leukemia virus 10                                                             |
| ILMN_2950044 | 0.70 | <b>F8</b>            | coagulation factor VIII                                                               |
| ILMN_3133448 | 0.70 | <b>Mfge8</b>         | milk fat globule-EGF factor 8 protein                                                 |
| ILMN_3107114 | 0.70 | <b>Stx3</b>          | syntaxin 3                                                                            |
| ILMN_2665359 | 0.70 | <b>Sgk3</b>          | serum/glucocorticoid regulated kinase 3                                               |
| ILMN_2847115 | 0.70 | <b>Gpr109a</b>       | G protein-coupled receptor 109A                                                       |
| ILMN_2667346 | 0.70 | <b>Npn3</b>          | sulfiredoxin 1 homolog ( <i>S. cerevisiae</i> ) (Srxn1)                               |
| ILMN_1244891 | 0.70 | <b>Cst7</b>          | cystatin F (leukocystatin)                                                            |
| ILMN_2620583 | 0.70 | <b>6720425G15Rik</b> |                                                                                       |
| ILMN_1224997 | 0.70 | <b>Mad</b>           | MAX dimerization protein 1                                                            |
| ILMN_2711948 | 0.70 | <b>Slc7a5</b>        | solute carrier family 7 (cationic amino acid transporter, y+ system), member 5        |
| ILMN_2918002 | 0.70 | <b>Gbp4</b>          | guanylate nucleotide binding protein 3 (Gbp3)                                         |
| ILMN_2614563 | 0.70 | <b>2210421G13Rik</b> | RIKEN cDNA 2210421G13 gene                                                            |
| ILMN_1221736 | 0.70 | <b>Samhd1</b>        | SAM domain and HD domain, 1                                                           |
| ILMN_1250450 | 0.70 | <b>Ogfr</b>          | opioid growth factor receptor                                                         |
| ILMN_2595387 | 0.70 | <b>Rnf31</b>         | ring finger protein 31                                                                |
| ILMN_1221937 | 0.70 | <b>F8</b>            | coagulation factor VIII                                                               |
| ILMN_2601471 | 0.70 | <b>Ccnd1</b>         | cyclin D1                                                                             |
| ILMN_1248657 | 0.70 | <b>2810004A10Rik</b> |                                                                                       |
| ILMN_1229042 | 0.70 | <b>Eef1b2</b>        | eukaryotic translation elongation factor 1 beta 2                                     |
| ILMN_1238505 | 0.70 | <b>Il10</b>          | interleukin 10                                                                        |
| ILMN_2717127 | 0.70 | <b>Ddx58</b>         | DEAD (Asp-Glu-Ala-Asp) box polypeptide 58                                             |
| ILMN_1224129 | 0.70 | <b>E030003N15Rik</b> |                                                                                       |
| ILMN_2654682 | 0.70 | <b>Hspa11</b>        |                                                                                       |
| ILMN_1242622 | 0.70 | <b>Crem</b>          | cAMP responsive element modulator                                                     |
| ILMN_1244272 | 0.70 | <b>Epb4.1l3</b>      | erythrocyte protein band 4.1-like 3                                                   |
| ILMN_1229994 | 0.70 | <b>Npn3</b>          | sulfiredoxin 1 homolog ( <i>S. cerevisiae</i> ) (Srxn1)                               |
| ILMN_2705119 | 0.70 | <b>Btg1</b>          | B-cell translocation gene 1, anti-proliferative                                       |
| ILMN_1251449 | 0.71 | <b>Gstm2</b>         | glutathione S-transferase, mu 2                                                       |
| ILMN_2615901 | 0.71 | <b>Ptk2</b>          | PTK2 protein tyrosine kinase 2                                                        |
| ILMN_2760001 | 0.71 | <b>Ppfibp2</b>       | protein tyrosine phosphatase, receptor-type, F interacting protein, binding protein 2 |
| ILMN_2636755 | 0.71 | <b>Asns</b>          | asparagine synthetase                                                                 |
| ILMN_2719202 | 0.71 | <b>Hist1h2bf</b>     | histone cluster 1, H2bf                                                               |
| ILMN_1226086 | 0.71 | <b>Ptpro</b>         |                                                                                       |
| ILMN_1224619 | 0.71 | <b>Siat4a</b>        |                                                                                       |
| ILMN_2996904 | 0.71 | <b>Obfc2a</b>        | oligonucleotide/oligosaccharide-binding fold containing 2A                            |
| ILMN_2606295 | 0.71 | <b>Gch1</b>          | GTP cyclohydrolase 1                                                                  |
| ILMN_2978574 | 0.71 | <b>Prpf38a</b>       | PRP38 pre- processing factor 38 (yeast) domain containing A                           |
| ILMN_2846812 | 0.71 | <b>Sp100</b>         | nuclear antigen Sp100                                                                 |
| ILMN_2806549 | 0.71 | <b>Prm1</b>          | protamine 1                                                                           |
| ILMN_2752873 | 0.71 | <b>Lgals9</b>        | lectin, galactose binding, soluble 9                                                  |
| ILMN_2621596 | 0.71 | <b>Psme2b</b>        |                                                                                       |
| ILMN_2642007 | 0.71 | <b>A130072J07</b>    | torsin A interacting protein 2 (Tor1aip2)                                             |

|              |      |                      |                                                                                |
|--------------|------|----------------------|--------------------------------------------------------------------------------|
| ILMN_2943135 | 0.71 | <b>Fmo3</b>          | flavin containing monooxygenase 3                                              |
| ILMN_2751539 | 0.71 | <b>Sdcbp</b>         | syndecan binding protein                                                       |
| ILMN_1214762 | 0.71 | <b>Sgk3</b>          | serum/glucocorticoid regulated kinase 3                                        |
| ILMN_2954881 | 0.71 | <b>Tcirg1</b>        | T-cell, immune regulator 1, ATPase, H+ transporting, lysosomal V0 protein A3   |
| ILMN_3162879 | 0.71 | <b>Stx3</b>          | syntaxin 3                                                                     |
| ILMN_2697002 | 0.71 | <b>Tlr3</b>          | toll-like receptor 3                                                           |
| ILMN_2604922 | 0.71 | <b>Rnf34</b>         | ring finger protein 34                                                         |
| ILMN_2504397 | 0.71 | <b>9130019I15Rik</b> |                                                                                |
| ILMN_2611755 | 0.72 | <b>Serpib6b</b>      | serine (or cysteine) peptidase inhibitor, clade B, member 6b                   |
| ILMN_2599164 | 0.72 | <b>Prpf38a</b>       | PRP38 pre- processing factor 38 (yeast) domain containing A                    |
| ILMN_2862470 | 0.72 | <b>Gstm2</b>         | glutathione S-transferase, mu 2                                                |
| ILMN_1250213 | 0.72 | <b>Sh3glb1</b>       | SH3-domain GRB2-like B1                                                        |
| ILMN_2588737 | 0.72 | <b>Rab3d</b>         | RAB3D, member RAS oncogene family                                              |
| ILMN_2716497 | 0.72 | <b>Ccne1</b>         |                                                                                |
| ILMN_2733567 | 0.72 | <b>B430306N03Rik</b> | RIKEN cDNA B430306N03 gene                                                     |
| ILMN_2599154 | 0.72 | <b>Oasl2</b>         | 2'-5' oligoadenylate synthetase-like 2                                         |
| ILMN_2624622 | 0.72 | <b>Akap12</b>        | A kinase (PRKA) anchor protein (gravin) 12                                     |
| ILMN_2659408 | 0.72 | <b>Rel</b>           | reticuloendotheliosis oncogene                                                 |
| ILMN_2657478 | 0.72 | <b>Cd53</b>          | CD53 antigen                                                                   |
| ILMN_2618714 | 0.72 | <b>Pdgfb</b>         | platelet derived growth factor, B                                              |
| ILMN_2844996 | 0.72 | <b>Actn1</b>         | actinin, alpha 1                                                               |
| ILMN_2674367 | 0.72 | <b>Agrn</b>          | agrin                                                                          |
| ILMN_3161105 | 0.72 | <b>AI450948</b>      | AHNAK nucleoprotein 2 (Ahnak2)                                                 |
| ILMN_2598877 | 0.72 | <b>Slc7a8</b>        | solute carrier family 7 (cationic amino acid transporter, y+ system), member 8 |
| ILMN_1240615 | 0.72 | <b>Olfm1</b>         | olfactomedin 1                                                                 |
| ILMN_2724595 | 0.72 | <b>Spata6</b>        | spermatogenesis associated 6                                                   |
| ILMN_1233455 | 0.72 | <b>Olfml3</b>        | olfactomedin-like 3                                                            |
| ILMN_3145213 | 0.72 | <b>H3f3a</b>         | H3 histone, family 3A                                                          |
| ILMN_2722383 | 0.72 | <b>Lhx2</b>          | LIM homeobox protein 2                                                         |
| ILMN_2657822 | 0.72 | <b>Stat2</b>         | signal transducer and activator of transcription 2                             |
| ILMN_1259252 | 0.72 | <b>Anxa1</b>         | annexin A1                                                                     |
| ILMN_1220799 | 0.73 | <b>Tank</b>          | TRAF family member-associated Nf-kappa B activator                             |
| ILMN_2697433 | 0.73 | <b>4732495E13Rik</b> |                                                                                |
| ILMN_3093622 | 0.73 | <b>Adar</b>          | adenosine deaminase, RNA-specific                                              |
| ILMN_2676606 | 0.73 | <b>Optn</b>          | optineurin                                                                     |
| ILMN_2754364 | 0.73 | <b>Ltf</b>           | lactotransferrin                                                               |
| ILMN_2694960 | 0.73 | <b>Msn</b>           | moesin                                                                         |
| ILMN_2603834 | 0.73 | <b>Htatip2</b>       | HIV-1 tat interactive protein 2, homolog (human)                               |
| ILMN_1250774 | 0.73 | <b>Mdm2</b>          | transformed mouse 3T3 cell double minute 2                                     |
| ILMN_2655034 | 0.73 | <b>Rnf135</b>        | ring finger protein 135                                                        |
| ILMN_2891646 | 0.73 | <b>Hist1h2bm</b>     | histone cluster 1, H2bm                                                        |
| ILMN_3123195 | 0.73 | <b>Slc1a2</b>        | solute carrier family 1 (glial high affinity glutamate transporter), member 2  |
| ILMN_1227240 | 0.73 | <b>Cdkn2b</b>        | cyclin-dependent kinase inhibitor 2B                                           |
| ILMN_2808485 | 0.73 | <b>LOC626578</b>     | macrophage activation 2 like LOC626578                                         |
| ILMN_2983525 | 0.73 | <b>D12Ert553e</b>    | DNA segment, Chr 12, expressed (D12Ert553e)                                    |
| ILMN_1217948 | 0.73 | <b>Csf3</b>          | colony stimulating factor 3 (granulocyte)                                      |
| ILMN_2825446 | 0.73 | <b>Sdcbp2</b>        | syndecan binding protein (syntenin) 2                                          |
| ILMN_2681670 | 0.73 | <b>BC026744</b>      | vacuolar protein sorting 37B (yeast) (Vps37b)                                  |

|              |      |                      |                                                                              |
|--------------|------|----------------------|------------------------------------------------------------------------------|
| ILMN_1257505 | 0.73 | <b>Samhd1</b>        | SAM domain and HD domain, 1                                                  |
| ILMN_1228330 | 0.73 | <b>Plcl2</b>         |                                                                              |
| ILMN_2683698 | 0.73 | <b>Fzd1</b>          | frizzled homolog 1 (Drosophila)                                              |
| ILMN_3154419 | 0.73 | <b>P2ry14</b>        | purinergic receptor P2Y G-protein coupled, 14                                |
| ILMN_2606072 | 0.73 | <b>Hrb</b>           | HIV-1 Rev binding protein                                                    |
| ILMN_3005441 | 0.73 | <b>Ppa1</b>          | pyrophosphatase (inorganic) 1                                                |
| ILMN_2971721 | 0.73 | <b>2410025L10Rik</b> | RIKEN cDNA 2410025L10 gene (2410025L10Rik)                                   |
| ILMN_2710705 | 0.73 | <b>Sqstm1</b>        | sequestosome 1                                                               |
| ILMN_1259564 | 0.73 | <b>AI481100</b>      | interferon inducible GTPase 2 (Ilgp2)                                        |
| ILMN_2944011 | 0.73 | <b>LOC547343</b>     | similar to H-2 class I histocompatibility antigen, L-D alpha chain precursor |
| ILMN_2866856 | 0.74 | <b>H2-DMA</b>        | histocompatibility 2, class II, locus Dma                                    |
| ILMN_1240868 | 0.74 | <b>2310015N21Rik</b> |                                                                              |
| ILMN_2663930 | 0.74 | <b>Slfn1</b>         | schlafen 1                                                                   |
| ILMN_2422743 | 0.74 | <b>Tor3a</b>         | torsin family 3, member A                                                    |
| ILMN_2663555 | 0.74 | <b>Asb3</b>          | ankyrin repeat and SOCS box-containing 3                                     |
| ILMN_2713714 | 0.74 | <b>Slc6a4</b>        | solute carrier family 6 (neurotransmitter transporter, serotonin), member 4  |
| ILMN_2684413 | 0.74 | <b>3230401D17Rik</b> | RIKEN cDNA 3230401D17 gene (3230401D17Rik)                                   |
| ILMN_2839745 | 0.74 | <b>A230050P20Rik</b> | RIKEN cDNA A230050P20 gene (A230050P20Rik)                                   |
| ILMN_3104094 | 0.74 | <b>2610208M17Rik</b> | RIKEN cDNA 2610208M17 gene (2610208M17Rik)                                   |
| ILMN_1235908 | 0.74 | <b>Fabp5</b>         | fatty acid binding protein 5                                                 |
| ILMN_2621752 | 0.74 | <b>Irf5</b>          | interferon regulatory factor 5                                               |
| ILMN_1257855 | 0.74 | <b>Stard8</b>        | START domain containing 8                                                    |
| ILMN_1235735 | 0.74 | <b>Slco3a1</b>       |                                                                              |
| ILMN_2711075 | 0.74 | <b>Mmp9</b>          | matrix metalloproteinase 9                                                   |
| ILMN_2623451 | 0.74 | <b>lft172</b>        | intraflagellar transport 172 homolog (Chlamydomonas)                         |
| ILMN_2670987 | 0.74 | <b>A430056A10Rik</b> | interferon-induced protein 44 (Ifi44)                                        |
| ILMN_3099470 | 0.74 | <b>Sox12</b>         | SRY-box containing gene 12                                                   |
| ILMN_2749412 | 0.74 | <b>Csf2</b>          | colony stimulating factor 2                                                  |
| ILMN_1242399 | 0.74 | <b>Hist1h2bc</b>     |                                                                              |
| ILMN_2605602 | 0.74 | <b>Gbp2</b>          | guanylate nucleotide binding protein 2                                       |
| ILMN_3099751 | 0.74 | <b>Prmt2</b>         | protein arginine N-methyltransferase 2                                       |
| ILMN_3013874 | 0.74 | <b>LOC434858</b>     | predicted gene, EG434858 (EG434858) on chromosome X                          |
| ILMN_2600004 | 0.74 | <b>Plk4</b>          |                                                                              |
| ILMN_3101732 | 0.74 | <b>Syng1</b>         | synaptogyrin 1                                                               |
| ILMN_1253808 | 0.74 | <b>Oas1g</b>         | 2'-5' oligoadenylate synthetase 1G                                           |
| ILMN_3082580 | 0.75 | <b>Azi2</b>          | 5-azacytidine induced gene 2                                                 |
| ILMN_2798694 | 0.75 | <b>Plekha2</b>       | pleckstrin homology domain containing, family F (with FYVE domain) member 2  |
| ILMN_1226639 | 0.75 | <b>BC006779</b>      |                                                                              |
| ILMN_1238547 | 0.75 | <b>Areg</b>          | amphiregulin                                                                 |
| ILMN_2678211 | 0.75 | <b>C2ta</b>          | class II transactivator                                                      |
| ILMN_2629289 | 0.75 | <b>Hist3h2a</b>      |                                                                              |
| ILMN_2604548 | 0.75 | <b>Rgs14</b>         | regulator of G-protein signaling 14                                          |
| ILMN_2946520 | 0.75 | <b>Npy</b>           | neuropeptide Y                                                               |
| ILMN_2716527 | 0.75 | <b>Mapk9</b>         | mitogen activated protein kinase 9                                           |
| ILMN_3143483 | 0.75 | <b>Wbscr5</b>        |                                                                              |
| ILMN_2704637 | 0.75 | <b>Kdt1</b>          |                                                                              |
| ILMN_2613140 | 0.75 | <b>Oas1b</b>         | 2'-5' oligoadenylate synthetase 1B                                           |
| ILMN_1213978 | 0.75 | <b>Ptpro</b>         |                                                                              |



|              |      |                      |                                                              |
|--------------|------|----------------------|--------------------------------------------------------------|
| ILMN_2709267 | 0.75 | <b>Gm1960</b>        | gene model 1960, (NCBI) (Gm1960)                             |
| ILMN_1227573 | 0.75 | <b>Irf7</b>          | interferon regulatory factor 7                               |
| ILMN_1219188 | 0.75 | <b>Akr1b8</b>        | aldo-keto reductase family 1, member B8                      |
| ILMN_2763245 | 0.75 | <b>Cxcl1</b>         | chemokine (C-X-C motif) ligand 1                             |
| ILMN_1215639 | 0.75 | <b>Commd1</b>        | COMM domain containing 1                                     |
| ILMN_2860649 | 0.75 | <b>Gbp6</b>          | guanylate binding protein 6                                  |
| ILMN_2941280 | 0.75 | <b>Artn</b>          | artemin                                                      |
| ILMN_2672708 | 0.75 | <b>Lrp11</b>         | low density lipoprotein receptor-related protein 11          |
| ILMN_1250690 | 0.75 | <b>Olf110</b>        | olfactory receptor 110                                       |
| ILMN_3157764 | 0.75 | <b>Golga7</b>        | golgi autoantigen, golgin subfamily a, 7                     |
| ILMN_2615145 | 0.75 | <b>Fbxw17</b>        | F-box and WD-40 domain protein 17                            |
| ILMN_1258636 | 0.75 | <b>Cadps</b>         | carbonic anhydrase 11                                        |
| ILMN_3159435 | 0.75 | <b>Mid1</b>          | midline 1                                                    |
| ILMN_1225565 | 0.75 | <b>Igf1</b>          | insulin-like growth factor 1                                 |
| ILMN_2754220 | 0.75 | <b>A130072J07</b>    | torsin A interacting protein 2                               |
| ILMN_3068754 | 0.76 | <b>Akr1a4</b>        | aldo-keto reductase family 1, member A4 (aldehyde reductase) |
| ILMN_1231686 | 0.76 | <b>Pcaf</b>          |                                                              |
| ILMN_1238346 | 0.76 | <b>BC022145</b>      |                                                              |
| ILMN_2732576 | 0.76 | <b>Pml</b>           |                                                              |
| ILMN_1227664 | 0.76 | <b>Dck</b>           | deoxycytidine kinase                                         |
| ILMN_2833243 | 0.76 | <b>C330023M02Rik</b> | RIKEN cDNA C330023M02 gene (C330023M02Rik)                   |
| ILMN_2627441 | 0.76 | <b>Peli1</b>         | pellino 1                                                    |
| ILMN_2677859 | 0.76 | <b>Insl6</b>         | insulin-like 6                                               |
| ILMN_2815479 | 0.76 | <b>L3mbt3</b>        | I(3)mbt-like 3 (Drosophila)                                  |
| ILMN_2592629 | 0.76 | <b>Nipsnap3b</b>     | nipsnap homolog 3A (C. elegans)                              |
| ILMN_2656422 | 0.76 | <b>BC028528</b>      | cDNA sequence BC028528 (BC028528)                            |
| ILMN_2975377 | 0.76 | <b>1110061O04Rik</b> | myotubularin related protein 14 (Mtmr14)                     |
| ILMN_2995688 | 0.76 | <b>EG433016</b>      | predicted gene, EG433016 (EG433016)                          |
| ILMN_3161936 | 0.76 | <b>Mpp1</b>          | membrane protein, palmitoylated                              |
| ILMN_2725414 | 0.76 | <b>Cd9</b>           | CD9 antigen                                                  |
| ILMN_2866185 | 0.76 | <b>Btg1</b>          | B-cell translocation gene 1, anti-proliferative              |
| ILMN_2749448 | 0.76 | <b>Al840980</b>      | pleckstrin homology domain containing, family Q member 1     |
| ILMN_2694998 | 0.76 | <b>Chmp2a</b>        | chromatin modifying protein 2A                               |
| ILMN_3067068 | 0.76 | <b>Tmsb10</b>        | thymosin, beta 10                                            |
| ILMN_2486267 | 0.76 | <b>Ube2l6</b>        | ubiquitin-conjugating enzyme E2L                             |
| ILMN_2730514 | 0.76 | <b>5031400M07Rik</b> | HERPUD family member 2 (Herpud2)                             |
| ILMN_2519677 | 0.76 | <b>Triobp</b>        | TRIO and F-actin binding protein                             |
| ILMN_1232627 | 0.76 | <b>6330442E10Rik</b> | RIKEN cDNA 6330442E10 gene (6330442E10Rik)                   |
| ILMN_1235365 | 0.76 | <b>Ralgs1</b>        | Ral GEF with PH domain and SH3 binding motif 1               |
| ILMN_2618549 | 0.76 | <b>Rab7</b>          | RAB7, member RAS oncogene family                             |
| ILMN_2972478 | 0.76 | <b>Nlgn2</b>         | neuroligin 2                                                 |
| ILMN_2924419 | 0.76 | <b>H2-Q7</b>         | histocompatibility 2, Q region locus 7                       |
| ILMN_2726931 | 0.76 | <b>Blnk</b>          | B-cell linker                                                |
| ILMN_1221048 | 0.76 | <b>Psat1</b>         | phosphoserine aminotransferase 1                             |
| ILMN_2796429 | 0.76 | <b>Psp1</b>          | PC4 and SFRS1 interacting protein 1                          |
| ILMN_2798993 | 0.76 | <b>Nr1d2</b>         | nuclear receptor subfamily 1, group D, member 2              |
| ILMN_2677046 | 0.76 | <b>Gstp1</b>         | glutathione S-transferase, pi 1                              |
| ILMN_2841593 | 0.76 | <b>Fgfbp3</b>        | fibroblast growth factor binding protein 3                   |

|              |      |                      |                                                                    |
|--------------|------|----------------------|--------------------------------------------------------------------|
| ILMN_2671204 | 0.76 | <b>Psme1</b>         | proteasome (prosome, macropain) 28 subunit, alpha                  |
| ILMN_1228557 | 0.76 | <b>Id2</b>           | inhibitor of DNA binding 2                                         |
| ILMN_2701815 | 0.77 | <b>Plxna2</b>        |                                                                    |
| ILMN_2866189 | 0.77 | <b>Btg1</b>          | B-cell translocation gene 1, anti-proliferative                    |
| ILMN_1236911 | 0.77 | <b>Inpp5b</b>        | inositol polyphosphate-5-phosphatase B                             |
| ILMN_2818678 | 0.77 | <b>Tdrd7</b>         | tudor domain containing 7                                          |
| ILMN_2628178 | 0.77 | <b>Socs2</b>         | suppressor of cytokine signaling 2                                 |
| ILMN_2934120 | 0.77 | <b>Hist2h3b</b>      | histone cluster 2, H3b                                             |
| ILMN_1250410 | 0.77 | <b>Prkr</b>          | eukaryotic translation initiation factor 2-alpha kinase 2          |
| ILMN_1244851 | 0.77 | <b>Usp15</b>         | ubiquitin specific peptidase 15                                    |
| ILMN_2927373 | 0.77 | <b>Ddit3</b>         | DNA-damage inducible transcript 3                                  |
| ILMN_2917540 | 0.77 | <b>Atp5o</b>         | ATP synthase, H+ transporting, mitochondrial F1 complex, O subunit |
| ILMN_2625085 | 0.77 | <b>1700112C13Rik</b> |                                                                    |
| ILMN_1257485 | 0.77 | <b>2610029G23Rik</b> | RIKEN cDNA 2610029G23 gene (2610029G23Rik)                         |
| ILMN_1235962 | 0.77 | <b>Hook2</b>         | hook homolog 2                                                     |
| ILMN_2711163 | 0.77 | <b>Ctsk</b>          | cathepsin K                                                        |
| ILMN_1214318 | 0.77 | <b>Rasgrp1</b>       | RAS guanyl releasing protein 1                                     |
| ILMN_2728034 | 0.77 | <b>Cam1</b>          | calcium modulating ligand                                          |
| ILMN_1256219 | 0.77 | <b>Sat1</b>          | spermidine/spermine N1-acetyl transferase 1                        |
| ILMN_2673917 | 0.77 | <b>2810022L02Rik</b> | RIKEN cDNA 2810022L02 gene (2810022L02Rik)                         |
| ILMN_2674602 | 0.77 | <b>Rapgef5</b>       | Rap guanine nucleotide exchange factor (GEF) 5                     |
| ILMN_1254655 | 0.77 | <b>Casp4</b>         | caspase 4, apoptosis-related cysteine peptidase                    |
| ILMN_1223600 | 0.77 | <b>Indo</b>          | indoleamine-pyrrole 2,3 dioxygenase                                |
| ILMN_2659739 | 0.77 | <b>Il7r</b>          | interleukin 7 receptor                                             |
| ILMN_3111334 | 0.77 | <b>Rsrc2</b>         | arginine/serine-rich coiled-coil 2                                 |
| ILMN_2689401 | 0.77 | <b>Mcoln2</b>        | mucoilin 2                                                         |
| ILMN_1243876 | 0.77 | <b>Casp8</b>         |                                                                    |
| ILMN_2620122 | 0.77 | <b>P2rx4</b>         | purinergic receptor P2X                                            |
| ILMN_2715304 | 0.77 | <b>Necap1</b>        | NECAP endocytosis associated 1                                     |
| ILMN_2742861 | 0.77 | <b>BC049975</b>      |                                                                    |
| ILMN_2727921 | 0.77 | <b>Tspo</b>          | translocator protein                                               |
| ILMN_2694964 | 0.77 | <b>Hook3</b>         |                                                                    |
| ILMN_2687586 | 0.77 | <b>Cxcl16</b>        | chemokine (C-X-C motif) ligand 16                                  |
| ILMN_3042783 | 0.77 | <b>Setdb2</b>        | SET domain, bifurcated 2                                           |
| ILMN_3107690 | 0.77 | <b>1700047I17Rik</b> | RIKEN cDNA 1700047I17 gene 1 (1700047I17Rik1)                      |
| ILMN_2777498 | 0.77 | <b>Il1b</b>          | interleukin-1beta                                                  |
| ILMN_2771034 | 0.78 | <b>Mfge8</b>         |                                                                    |
| ILMN_2685088 | 0.78 | <b>9930111J21Rik</b> | RIKEN cDNA 9930111J21 gene (9930111J21Rik)                         |
| ILMN_3136867 | 0.78 | <b>Josd3</b>         | Josephin domain containing 3                                       |
| ILMN_1254173 | 0.78 | <b>Laptm4a</b>       | lysosomal-associated protein transmembrane 4A                      |
| ILMN_2606990 | 0.78 | <b>Asph</b>          | aspartate-beta-hydroxylase                                         |
| ILMN_3008406 | 0.78 | <b>Odc1</b>          | ornithine decarboxylase, structural 1                              |
| ILMN_1220109 | 0.78 | <b>Trim36</b>        | tripartite motif-containing 36                                     |
| ILMN_2437513 | 0.78 | <b>Tor3a</b>         | torsin family 3                                                    |
| ILMN_1223230 | 0.78 | <b>Gstp1</b>         | glutathione S-transferase, pi 1                                    |
| ILMN_2756943 | 0.78 | <b>Sdc1</b>          | syndecan 1                                                         |
| ILMN_2733778 | 0.78 | <b>Il4i1</b>         | interleukin 4 induced 1                                            |
| ILMN_2944870 | 0.78 | <b>Klhl5</b>         | kelch-like 5 (Drosophila)                                          |

|              |      |                      |                                                       |
|--------------|------|----------------------|-------------------------------------------------------|
| ILMN_2756008 | 0.78 | <b>Nasp</b>          | nuclear autoantigenic sperm protein                   |
| ILMN_1231396 | 0.78 | <b>Sertad3</b>       | SERTA domain containing 3                             |
| ILMN_2658786 | 0.78 | <b>Cxcr3</b>         | chemokine (C-X-C motif) receptor 3                    |
| ILMN_2445848 | 0.78 | <b>Zfp238</b>        |                                                       |
| ILMN_1246905 | 0.78 | <b>Rasgrp1</b>       | RAS guanyl releasing protein 1                        |
| ILMN_1232121 | 0.78 | <b>Zeb2</b>          | zinc finger E-box binding homeobox 2                  |
| ILMN_2641669 | 0.78 | <b>Fem1c</b>         | fem-1 homolog c (C.elegans)                           |
| ILMN_2718600 | 0.78 | <b>Nfyb</b>          |                                                       |
| ILMN_2693940 | 0.78 | <b>Psmb8</b>         | proteasome (prosome, macropain) subunit               |
| ILMN_1244134 | 0.78 | <b>Lrp4</b>          | low density lipoprotein receptor-related protein 4    |
| ILMN_2674475 | 0.78 | <b>9930022N03Rik</b> | RIKEN cDNA 9930022N03 gene (9930022N03Rik)            |
| ILMN_2696360 | 0.78 | <b>2310010B21Rik</b> |                                                       |
| ILMN_2993314 | 0.78 | <b>Clec4n</b>        | C-type lectin domain family 4, member n               |
| ILMN_2727799 | 0.78 | <b>Trafd1</b>        | TRAF type zinc finger domain containing 1             |
| ILMN_1249242 | 0.78 | <b>Zrf2</b>          | DnaJ (Hsp40) homolog, subfamily C, member 2           |
| ILMN_1225035 | 0.78 | <b>Carhsp1</b>       | calcium regulated heat stable protein 1               |
| ILMN_2828916 | 0.78 | <b>Frmfd6</b>        | FERM domain containing 6                              |
| ILMN_2704372 | 0.78 | <b>Adar</b>          | adenosine deaminase, RNA-specific                     |
| ILMN_1219946 | 0.78 | <b>Il10ra</b>        | interleukin 10 receptor, alpha                        |
| ILMN_2622997 | 0.78 | <b>Sesn3</b>         |                                                       |
| ILMN_2758545 | 0.78 | <b>Cldn23</b>        | claudin 23                                            |
| ILMN_2689651 | 0.78 | <b>A530023O14Rik</b> | RIKEN cDNA A530023O14 gene (A530023O14Rik)            |
| ILMN_2987995 | 0.78 | <b>Bfar</b>          | bifunctional apoptosis regulator                      |
| ILMN_2669343 | 0.78 | <b>2810453L12Rik</b> |                                                       |
| ILMN_2751492 | 0.78 | <b>Frag1</b>         | FGF receptor activating protein 1                     |
| ILMN_2695412 | 0.78 | <b>LOC209387</b>     | expressed sequence AI451617 (AI451617)                |
| ILMN_2998807 | 0.78 | <b>Stard8</b>        | START domain containing 8                             |
| ILMN_2642525 | 0.79 | <b>Rwdd1</b>         | RWD domain containing 1                               |
| ILMN_2914843 | 0.79 | <b>Psmb10</b>        | proteasome (prosome, macropain) subunit, beta type 10 |
| ILMN_2774486 | 0.79 | <b>Bcdod2</b>        | beta-carotene 9', 10'-dioxygenase 2                   |
| ILMN_2611450 | 0.79 | <b>Ift172</b>        | intraflagellar transport 172 homolog (Chlamydomonas)  |
| ILMN_2625279 | 0.79 | <b>Pacrg</b>         | Park2 co-regulated                                    |
| ILMN_2689785 | 0.79 | <b>Cd68</b>          | CD68 antigen                                          |
| ILMN_3080300 | 0.79 | <b>Rin2</b>          | Ras and Rab interactor 2                              |
| ILMN_1244135 | 0.79 | <b>Arpc5</b>         | actin related protein 2/3 complex, subunit 5          |
| ILMN_2761109 | 0.79 | <b>Clic4</b>         | chloride intracellular channel 4                      |
| ILMN_2643513 | 0.79 | <b>Asns</b>          | asparagine synthetase                                 |
| ILMN_2735080 | 0.79 | <b>Armc8</b>         | armadillo repeat containing 8                         |
| ILMN_3073899 | 0.79 | <b>Pira11</b>        | paired-Ig-like receptor A11                           |
| ILMN_3159149 | 0.79 | <b>Rusc2</b>         | RUN and SH3 domain containing 2                       |
| ILMN_3068231 | 0.79 | <b>Max</b>           | Max protein                                           |
| ILMN_1240683 | 0.79 | <b>Chmp2a</b>        | chromatin modifying protein 2A                        |
| ILMN_2836654 | 0.79 | <b>Hist1h2ao</b>     | histone cluster 1, H2ao                               |
| ILMN_2687905 | 0.79 | <b>Msi2h</b>         | Musashi homolog 2                                     |
| ILMN_2867382 | 0.79 | <b>Psd4</b>          | pleckstrin and Sec7 domain containing 4               |
| ILMN_2593196 | 0.79 | <b>Stat1</b>         | signal transducer and activator of transcription 1    |
| ILMN_1258125 | 0.79 | <b>Rab9</b>          | RAB9, member RAS oncogene family                      |
| ILMN_2944988 | 0.79 | <b>Lipn</b>          | lipase, family member N (Lipn) XM_972783              |

|              |      |                           |                                                                          |
|--------------|------|---------------------------|--------------------------------------------------------------------------|
| ILMN_1250409 | 0.79 | <b>Tap1</b>               | transporter 1, ATP-binding cassette, sub-family B (MDR/TAP)              |
| ILMN_2603898 | 0.79 | <b>1810046I24Rik</b>      | C-type lectin domain family 4, member b1 (Clec4b1)                       |
| ILMN_3078327 | 0.79 | <b>Bcl2l11</b>            | BCL2-like 11 (apoptosis facilitator)                                     |
| ILMN_2650106 | 0.79 | <b>1700001A24Rik</b>      |                                                                          |
| ILMN_2634796 | 0.79 | <b>Socs1</b>              | suppressor of cytokine signaling 1                                       |
| ILMN_2715042 | 0.79 | <b>Sdc3</b>               | syndecan 3                                                               |
| ILMN_3160212 | 0.79 | <b>AU021838</b>           | expressed sequence AU021838 (AU021838)                                   |
| ILMN_2895862 | 0.79 | <b>Psmb6</b>              | proteasome (prosome, macropain) subunit, beta type 6                     |
| ILMN_1244526 | 0.79 | <b>Blnk</b>               |                                                                          |
| ILMN_2779636 | 0.79 | <b>5730589K01Rik</b>      | RIKEN cDNA 5730589K01 gene (5730589K01Rik)                               |
| ILMN_2744337 | 0.79 | <b>Cd47</b>               | CD47 antigen (Rh-related antigen, integrin-associated signal transducer) |
| ILMN_2727920 | 0.79 | <b>Tspo</b>               | translocator protein                                                     |
| ILMN_2767113 | 0.79 | <b>Tgif</b>               | TG interacting factor 1                                                  |
| ILMN_2931853 | 0.80 | <b>OTTMUSG00000000990</b> | predicted gene, OTTMUSG00000000990                                       |
| ILMN_2753029 | 0.80 | <b>Gch1</b>               |                                                                          |
| ILMN_1239770 | 0.80 | <b>Peli1</b>              | pellino 1                                                                |
| ILMN_1220034 | 0.80 | <b>Junb</b>               | Jun-B oncogene                                                           |
| ILMN_2946088 | 0.80 | <b>Panx1</b>              | pannexin 1                                                               |
| ILMN_2718843 | 0.80 | <b>4632417K18Rik</b>      | RIKEN cDNA 4632417K18 gene (4632417K18Rik)                               |
| ILMN_2749955 | 0.80 | <b>2400003C14Rik</b>      | RIKEN cDNA 2400003C14 gene (2400003C14Rik)                               |
| ILMN_1228479 | 0.80 | <b>Kremen</b>             | kringle containing transmembrane protein 1                               |
| ILMN_2739123 | 0.80 | <b>Pex7</b>               | peroxisome biogenesis factor 7                                           |
| ILMN_1238676 | 0.80 | <b>Phr1</b>               | pam, highwire, rpm 1                                                     |
| ILMN_1248812 | 0.80 | <b>Srd5a2l</b>            | steroid 5 alpha-reductase 2-like                                         |
| ILMN_2894678 | 0.80 | <b>H2-T10</b>             | histocompatibility 2, T region locus 10                                  |
| ILMN_3104025 | 0.80 | <b>Asb13</b>              | ankyrin repeat and SOCS box-containing protein 13                        |
| ILMN_2642886 | 0.81 | <b>D130054N24Rik</b>      |                                                                          |
| ILMN_2846775 | 0.81 | <b>Cdkn1a</b>             | cyclin-dependent kinase inhibitor 1A (P21)                               |
| ILMN_2681984 | 0.81 | <b>1300018I05Rik</b>      | RIKEN cDNA 1300018I05 gene (1300018I05Rik)                               |
| ILMN_2509737 | 0.82 | <b>Trex1</b>              |                                                                          |
| ILMN_2936671 | 1.50 | <b>Skap2</b>              | src family associated phosphoprotein 2                                   |
| ILMN_1237132 | 1.50 | <b>AW549877</b>           | expressed sequence AW549877                                              |
| ILMN_2781030 | 1.50 | <b>Napsa</b>              | napsin A aspartic peptidase                                              |
| ILMN_2627895 | 1.50 | <b>Etfb</b>               | electron transferring flavoprotein, beta polypeptide                     |
| ILMN_2744693 | 1.50 | <b>Ufc1</b>               | ubiquitin-fold modifier conjugating enzyme 1                             |
| ILMN_3096361 | 1.50 | <b>Bclaf1</b>             | BCL2-associated transcription factor 1                                   |
| ILMN_2716567 | 1.50 | <b>Bnip3l</b>             | BCL2/adenovirus E1B interacting protein 3-like                           |
| ILMN_1245815 | 1.50 | <b>Ube2o</b>              | ubiquitin-conjugating enzyme E2O                                         |
| ILMN_1239578 | 1.50 | <b>Man2a1</b>             | mannosidase 2, alpha 1                                                   |
| ILMN_1215147 | 1.51 | <b>LOC100044829</b>       | rRNA 2'-O-methyltransferase fibrillarin-like                             |
| ILMN_1225360 | 1.51 | <b>Ythdf2</b>             | YTH domain family 2                                                      |
| ILMN_2965669 | 1.51 | <b>Xlr4a</b>              | X-linked lymphocyte-regulated 4A                                         |
| ILMN_2721357 | 1.51 | <b>Lhfp12</b>             | lipoma HMGIC fusion partner-like 2                                       |
| ILMN_2599110 | 1.51 | <b>Usp1l</b>              | ubiquitin specific peptidase like 1                                      |
| ILMN_2617835 | 1.51 | <b>Myo9b</b>              | myosin IXb                                                               |
| ILMN_1226126 | 1.51 | <b>Dolk</b>               | dolichol kinase                                                          |
| ILMN_2878060 | 1.51 | <b>Anxa6</b>              | annexin A6                                                               |
| ILMN_1226970 | 1.51 | <b>Wwp2</b>               | WW domain containing E3 ubiquitin protein ligase 2                       |

|              |      |                      |                                                                      |
|--------------|------|----------------------|----------------------------------------------------------------------|
| ILMN_2516266 | 1.51 | <b>Ccar1</b>         | cell division cycle and apoptosis regulator 1                        |
| ILMN_1234425 | 1.51 | <b>Iscu</b>          | IscU iron-sulfur cluster scaffold homolog (E. coli)                  |
| ILMN_2690061 | 1.51 | <b>Hnrpd1</b>        | heterogeneous nuclear ribonucleoprotein D-like                       |
| ILMN_2955214 | 1.51 | <b>1110032A13Rik</b> | RIKEN cDNA 1110032A13 gene                                           |
| ILMN_2700448 | 1.51 | <b>Cytsa</b>         | cytospin A                                                           |
| ILMN_2741114 | 1.51 | <b>Gusb</b>          | glucuronidase, beta                                                  |
| ILMN_2816180 | 1.51 | <b>Lbh</b>           | limb-bud and heart                                                   |
| ILMN_1251771 | 1.51 | <b>Cyc1</b>          | cytochrome c-1                                                       |
| ILMN_1259561 | 1.51 | <b>Prep</b>          | prolyl endopeptidase                                                 |
| ILMN_2696610 | 1.51 | <b>Slc25a37</b>      | solute carrier family 25, member 37                                  |
| ILMN_2888181 | 1.51 | <b>Echs1</b>         | enoyl Coenzyme A hydratase, short chain, 1, mitochondrial            |
| ILMN_2829457 | 1.52 | <b>Ncf1</b>          | neutrophil cytosolic factor 1                                        |
| ILMN_1228287 | 1.52 | <b>Calu</b>          | calumenin                                                            |
| ILMN_2817151 | 1.52 | <b>Chchd8</b>        | coiled-coil-helix-coiled-coil-helix domain containing 8              |
| ILMN_2987339 | 1.52 | <b>Mybbp1a</b>       | MYB binding protein (P160) 1a                                        |
| ILMN_2603953 | 1.52 | <b>Stip1</b>         | stress-induced phosphoprotein 1                                      |
| ILMN_3151345 | 1.52 | <b>Eif5</b>          | eukaryotic translation initiation factor 5                           |
| ILMN_2744138 | 1.52 | <b>Ctnbp2nl</b>      | CTTNBP2 N-terminal like                                              |
| ILMN_2631098 | 1.52 | <b>Msh6</b>          | mutS homolog 6 (E. coli)                                             |
| ILMN_2925974 | 1.52 | <b>Zcchc8</b>        | zinc finger, CCHC domain containing 8                                |
| ILMN_3109360 | 1.52 | <b>Plec</b>          | plectin                                                              |
| ILMN_1230302 | 1.52 | <b>Napsa</b>         | napsin A aspartic peptidase                                          |
| ILMN_2795792 | 1.52 | <b>Tmem38b</b>       | transmembrane protein 38B                                            |
| ILMN_1239857 | 1.52 | <b>Extl3</b>         | exostoses (multiple)-like 3                                          |
| ILMN_1243370 | 1.52 | <b>Cyb5r1</b>        | cytochrome b5 reductase 1                                            |
| ILMN_2718284 | 1.52 | <b>Mfsd1</b>         | major facilitator superfamily domain containing 1                    |
| ILMN_2983686 | 1.52 | <b>Trub2</b>         | TruB pseudouridine (psi) synthase homolog 2 (E. coli)                |
| ILMN_2800881 | 1.52 | <b>A430005L14Rik</b> | RIKEN cDNA A430005L14 gene                                           |
| ILMN_2929952 | 1.52 | <b>Sacm1l</b>        | SAC1 (suppressor of actin mutations 1, homolog)-like (S. cerevisiae) |
| ILMN_1254256 | 1.52 | <b>Actl6a</b>        | actin-like 6A                                                        |
| ILMN_2700425 | 1.52 | <b>Atp9b</b>         | ATPase, class II, type 9B                                            |
| ILMN_1229056 | 1.52 | <b>Fam3c</b>         | family with sequence similarity 3, member C                          |
| ILMN_2789208 | 1.52 | <b>Tollip</b>        | toll interacting protein                                             |
| ILMN_1214358 | 1.52 | <b>Akt1s1</b>        | AKT1 substrate 1 (proline-rich)                                      |
| ILMN_2760263 | 1.52 | <b>Poldip2</b>       | polymerase (DNA-directed), delta interacting protein 2               |
| ILMN_2636490 | 1.52 | <b>Htatsf1</b>       | HIV TAT specific factor 1                                            |
| ILMN_2863965 | 1.52 | <b>Pfn1</b>          | profilin 1                                                           |
| ILMN_2883961 | 1.52 | <b>Vamp7</b>         | vesicle-associated membrane protein 7                                |
| ILMN_2749958 | 1.52 | <b>Cerk</b>          | similar to Ceramide kinase (Acylsphingosine kinase) (mCERK)          |
| ILMN_2593208 | 1.52 | <b>Imp3</b>          | IMP3, U3 small nucleolar ribonucleoprotein, homolog (yeast)          |
| ILMN_2679532 | 1.52 | <b>Lage3</b>         | L antigen family, member 3                                           |
| ILMN_1244188 | 1.52 | <b>H6pd</b>          | hexose-6-phosphate dehydrogenase (glucose 1-dehydrogenase)           |
| ILMN_1214054 | 1.52 | <b>Zdhhc7</b>        | zinc finger, DHHC domain containing 7                                |
| ILMN_2616000 | 1.52 | <b>Tsen15</b>        | tRNA splicing endonuclease 15 homolog (S. cerevisiae)                |
| ILMN_2936427 | 1.52 | <b>Mcm4</b>          | minichromosome maintenance deficient 4 homolog (S. cerevisiae)       |
| ILMN_1233076 | 1.53 | <b>PrkcsH</b>        | protein kinase C substrate 80K-H                                     |
| ILMN_2658208 | 1.53 | <b>Setd8</b>         | SET domain containing (lysine methyltransferase) 8                   |
| ILMN_1254540 | 1.53 | <b>Crbn</b>          | cereblon                                                             |

|              |      |                      |                                                                                    |
|--------------|------|----------------------|------------------------------------------------------------------------------------|
| ILMN_1215647 | 1.53 | <b>Mum1</b>          | melanoma associated antigen (mutated) 1                                            |
| ILMN_2846255 | 1.53 | <b>Pgpep1</b>        | pyroglutamyl-peptidase I                                                           |
| ILMN_2751228 | 1.53 | <b>Nudcd2</b>        | NudC domain containing 2                                                           |
| ILMN_2786164 | 1.53 | <b>Arhgap1</b>       | Rho GTPase activating protein 1                                                    |
| ILMN_2931411 | 1.53 | <b>Cct3</b>          | chaperonin containing Tcp1, subunit 3 (gamma)                                      |
| ILMN_2747897 | 1.53 | <b>Ndufs3</b>        | NADH dehydrogenase (ubiquinone) Fe-S protein 3                                     |
| ILMN_2978163 | 1.53 | <b>Nfs1</b>          | nitrogen fixation gene 1 ( <i>S. cerevisiae</i> )                                  |
| ILMN_1221251 | 1.53 | <b>1110012D08Rik</b> | RIKEN cDNA 1110012D08 gene                                                         |
| ILMN_2635633 | 1.53 | <b>Smu1</b>          | smu-1 suppressor of mec-8 and unc-52 homolog ( <i>C. elegans</i> )                 |
| ILMN_2751354 | 1.53 | <b>Pde4dip</b>       | phosphodiesterase 4D interacting protein (myomegalin)                              |
| ILMN_1250750 | 1.53 | <b>Rnf113a2</b>      | ring finger protein 113A2                                                          |
| ILMN_2696247 | 1.53 | <b>Arih2</b>         | ariadne homolog 2 ( <i>Drosophila</i> )                                            |
| ILMN_2915861 | 1.53 | <b>Psm1</b>          | proteasome (prosome, macropain) 26S subunit, non-ATPase, 1                         |
| ILMN_1213645 | 1.53 | <b>AI467606</b>      | expressed sequence AI467606                                                        |
| ILMN_2588832 | 1.53 | <b>Thap11</b>        | THAP domain containing 11                                                          |
| ILMN_2665870 | 1.53 | <b>Dhx36</b>         | DEAH (Asp-Glu-Ala-His) box polypeptide 36                                          |
| ILMN_1227463 | 1.53 | <b>LOC100047834</b>  | similar to translin associated protein X                                           |
| ILMN_2615207 | 1.53 | <b>Dci</b>           | dodecenoyl-Coenzyme A delta isomerase (3,2 trans-enoyl-Coenzyme A isomerase)       |
| ILMN_2650439 | 1.53 | <b>Galnt1</b>        | UDP-N-acetyl-alpha-D-galactosamine:polypeptide N-acetylgalactosaminyltransferase 1 |
| ILMN_2718612 | 1.53 | <b>Mto1</b>          | mitochondrial translation optimization 1 homolog ( <i>S. cerevisiae</i> )          |
| ILMN_2658392 | 1.53 | <b>Atp2c1</b>        | ATPase, Ca <sup>++</sup> -sequestering                                             |
| ILMN_1236796 | 1.53 | <b>Smn1</b>          | survival motor neuron 1                                                            |
| ILMN_2749717 | 1.53 | <b>Bcl3</b>          | B-cell leukemia/lymphoma 3                                                         |
| ILMN_2643067 | 1.53 | <b>Rnf185</b>        | ring finger protein 185                                                            |
| ILMN_1224868 | 1.53 | <b>Phb2</b>          | prohibitin 2                                                                       |
| ILMN_1239143 | 1.53 | <b>Sdh1</b>          | succinate dehydrogenase complex, subunit D, integral membrane protein              |
| ILMN_3116330 | 1.53 | <b>Cuta</b>          | cutA divalent cation tolerance homolog ( <i>E. coli</i> )                          |
| ILMN_2771074 | 1.53 | <b>Hnrnpa2b1</b>     | heterogeneous nuclear ribonucleoprotein A2/B1                                      |
| ILMN_2703023 | 1.53 | <b>Fcho1</b>         | FCH domain only 1                                                                  |
| ILMN_2693991 | 1.53 | <b>Gpr65</b>         | G-protein coupled receptor 65                                                      |
| ILMN_2652572 | 1.53 | <b>Ing4</b>          | inhibitor of growth family, member 4                                               |
| ILMN_2835723 | 1.53 | <b>Manba</b>         | mannosidase, beta A, lysosomal                                                     |
| ILMN_2688075 | 1.53 | <b>Cyp51</b>         | cytochrome P450, family 51                                                         |
| ILMN_2780876 | 1.53 | <b>Gpr137</b>        | G protein-coupled receptor 137                                                     |
| ILMN_2757445 | 1.53 | <b>Ccdc41</b>        | coiled-coil domain containing 41                                                   |
| ILMN_1249581 | 1.54 | <b>Gtf3c2</b>        | general transcription factor IIIC, polypeptide 2, beta                             |
| ILMN_2795791 | 1.54 | <b>Tmem38b</b>       | transmembrane protein 38B                                                          |
| ILMN_2776952 | 1.54 | <b>Tmem55b</b>       | transmembrane protein 55b                                                          |
| ILMN_1216231 | 1.54 | <b>Scoc</b>          | short coiled-coil protein                                                          |
| ILMN_1260033 | 1.54 | <b>Map1lc3b</b>      | microtubule-associated protein 1 light chain 3 beta                                |
| ILMN_2609568 | 1.54 | <b>Pygo2</b>         | pygopus 2                                                                          |
| ILMN_2723190 | 1.54 | <b>Guca1a</b>        | guanylate cyclase activator 1a (retina)                                            |
| ILMN_1246740 | 1.54 | <b>Slc35b2</b>       | solute carrier family 35, member B2                                                |
| ILMN_2831579 | 1.54 | <b>Kctd5</b>         | potassium channel tetramerisation domain containing 5                              |
| ILMN_2697270 | 1.54 | <b>Scamp4</b>        | secretory carrier membrane protein 4                                               |
| ILMN_2739398 | 1.54 | <b>Prickle3</b>      | prickle homolog 3 ( <i>Drosophila</i> )                                            |
| ILMN_2634264 | 1.54 | <b>Gde1</b>          | glycerophosphodiester phosphodiesterase 1                                          |
| ILMN_2754148 | 1.54 | <b>Dusp16</b>        | dual specificity phosphatase 16                                                    |

|              |      |                      |                                                                                         |
|--------------|------|----------------------|-----------------------------------------------------------------------------------------|
| ILMN_1255697 | 1.54 | <b>1110049F12Rik</b> | RIKEN cDNA 1110049F12 gene                                                              |
| ILMN_2880536 | 1.54 | <b>Uck2</b>          | uridine-cytidine kinase 2                                                               |
| ILMN_2602140 | 1.54 | <b>Eif2b5</b>        | eukaryotic translation initiation factor 2B, subunit 5 epsilon                          |
| ILMN_1229971 | 1.54 | <b>VeZF1</b>         | vascular endothelial zinc finger 1                                                      |
| ILMN_2674752 | 1.54 | <b>Snx11</b>         | sorting nexin 11                                                                        |
| ILMN_2934532 | 1.54 | <b>Prpf19</b>        | PRP19/PSO4 pre- processing factor 19 homolog (S. cerevisiae)                            |
| ILMN_2649810 | 1.54 | <b>Rpl3l</b>         | ribosomal protein L3-like                                                               |
| ILMN_2676481 | 1.54 | <b>Gde1</b>          | glycerophosphodiester phosphodiesterase 1                                               |
| ILMN_2675249 | 1.54 | <b>Slc35c1</b>       | solute carrier family 35, member C1                                                     |
| ILMN_1257876 | 1.54 | <b>B3gnt1</b>        | UDP-GlcNAc:betaGal beta-1,3-N-acetylglucosaminyltransferase 1                           |
| ILMN_2723931 | 1.54 | <b>E2f6</b>          | E2F transcription factor 6                                                              |
| ILMN_2903698 | 1.54 | <b>Snapc3</b>        | small nuclear RNA activating complex, polypeptide 3                                     |
| ILMN_2727432 | 1.54 | <b>Stab1</b>         | stabilin 1                                                                              |
| ILMN_2611993 | 1.54 | <b>Tbc1d17</b>       | TBC1 domain family, member 17                                                           |
| ILMN_2807665 | 1.54 | <b>Gatc</b>          | glutamyl-tRNA(Gln) amidotransferase, subunit C homolog (bacterial)                      |
| ILMN_1242239 | 1.54 | <b>Srrt</b>          | serrate RNA effector molecule homolog (Arabidopsis)                                     |
| ILMN_1237963 | 1.55 | <b>Alg8</b>          | asparagine-linked glycosylation 8 homolog (yeast, alpha-1,3-glucosyltransferase)        |
| ILMN_1235281 | 1.55 | <b>1810063B05Rik</b> | RIKEN cDNA 1810063B05 gene                                                              |
| ILMN_1239294 | 1.55 | <b>Cdc42ep2</b>      | CDC42 effector protein (Rho GTPase binding) 2                                           |
| ILMN_2665008 | 1.55 | <b>Rab31</b>         | RAB31, member RAS oncogene family                                                       |
| ILMN_1238583 | 1.55 | <b>Aagab</b>         | alpha- and gamma-adaptin binding protein                                                |
| ILMN_3134607 | 1.55 | <b>Trim3</b>         | tripartite motif-containing 3                                                           |
| ILMN_2693124 | 1.55 | <b>Rab1b</b>         | RAB1B, member RAS oncogene family                                                       |
| ILMN_1252210 | 1.55 | <b>2700097O09Rik</b> | RIKEN cDNA 2700097O09 gene                                                              |
| ILMN_2732565 | 1.55 | <b>Mrps31</b>        | mitochondrial ribosomal protein S31                                                     |
| ILMN_2667551 | 1.55 | <b>Exosc4</b>        | exosome component 4                                                                     |
| ILMN_1232272 | 1.55 | <b>Gmppa</b>         | GDP-mannose pyrophosphorylase A                                                         |
| ILMN_2822071 | 1.55 | <b>Slc25a16</b>      | solute carrier family 25 (mitochondrial carrier, Graves disease autoantigen), member 16 |
| ILMN_2646322 | 1.55 | <b>Samsn1</b>        | SAM domain, SH3 domain and nuclear localization signals, 1                              |
| ILMN_2643832 | 1.55 | <b>Ppm1g</b>         | protein phosphatase 1G (formerly 2C), magnesium-dependent, gamma isoform                |
| ILMN_1224651 | 1.55 | <b>Fam98a</b>        | family with sequence similarity 98, member A                                            |
| ILMN_3000318 | 1.55 | <b>Adrbk1</b>        | adrenergic receptor kinase, beta 1                                                      |
| ILMN_3134598 | 1.55 | <b>Pdp2</b>          | pyruvate dehydrogenase phosphatase catalytic subunit 2                                  |
| ILMN_1241675 | 1.55 | <b>Ascc2</b>         | activating signal cointegrator 1 complex subunit 2                                      |
| ILMN_2712668 | 1.55 | <b>Pfkfb4</b>        | 6-phosphofructo-2-kinase/fructose-2,6-biphosphatase 4                                   |
| ILMN_1251761 | 1.55 | <b>Phf5a</b>         | PHD finger protein 5A                                                                   |
| ILMN_2949275 | 1.55 | <b>Zfp637</b>        | zinc finger protein 637                                                                 |
| ILMN_1238520 | 1.55 | <b>Clk2</b>          | CDC-like kinase 2                                                                       |
| ILMN_2823778 | 1.55 | <b>Sc4mol</b>        | sterol-C4-methyl oxidase-like                                                           |
| ILMN_1258738 | 1.55 | <b>Sidt2</b>         | SID1 transmembrane family, member 2                                                     |
| ILMN_2457585 | 1.55 | <b>Trp53inp2</b>     | transformation related protein 53 inducible nuclear protein 2                           |
| ILMN_1224658 | 1.55 | <b>Spast</b>         | spastin                                                                                 |
| ILMN_2733120 | 1.56 | <b>Lbr</b>           | lamin B receptor                                                                        |
| ILMN_1231868 | 1.56 | <b>Ar16</b>          | ADP-ribosylation factor-like 16                                                         |
| ILMN_1221983 | 1.56 | <b>1810030N24Rik</b> | RIKEN cDNA 1810030N24 gene                                                              |
| ILMN_2640883 | 1.56 | <b>Nde1</b>          | nuclear distribution gene E homolog 1 (A nidulans)                                      |
| ILMN_2826816 | 1.56 | <b>Ppox</b>          | protoporphyrinogen oxidase                                                              |
| ILMN_2619491 | 1.56 | <b>Arfip2</b>        | ADP-ribosylation factor interacting protein 2                                           |

|              |      |                      |                                                                                    |
|--------------|------|----------------------|------------------------------------------------------------------------------------|
| ILMN_1242352 | 1.56 | <b>Acp6</b>          | acid phosphatase 6, lysophosphatidic                                               |
| ILMN_1247245 | 1.56 | <b>BC003266</b>      | cDNA sequence BC003266                                                             |
| ILMN_2761188 | 1.56 | <b>Ibtk</b>          | inhibitor of Bruton agammaglobulinemia tyrosine kinase                             |
| ILMN_2808939 | 1.56 | <b>0610007P14Rik</b> | RIKEN cDNA 0610007P14 gene                                                         |
| ILMN_2671708 | 1.56 | <b>Dnajc5</b>        | DnaJ (Hsp40) homolog, subfamily C, member 5                                        |
| ILMN_2650275 | 1.56 | <b>1810055G02Rik</b> | RIKEN cDNA 1810055G02 gene                                                         |
| ILMN_2748837 | 1.56 | <b>Aco2</b>          | aconitase 2, mitochondrial                                                         |
| ILMN_2699003 | 1.56 | <b>Siva1</b>         | SIVA1, apoptosis-inducing factor                                                   |
| ILMN_1225674 | 1.56 | <b>Eps15l1</b>       | epidermal growth factor receptor pathway substrate 15-like 1                       |
| ILMN_2639373 | 1.56 | <b>Mrpl17</b>        | mitochondrial ribosomal protein L17                                                |
| ILMN_3158909 | 1.56 | <b>Banf1</b>         | barrier to autointegration factor 1                                                |
| ILMN_1237371 | 1.56 | <b>LOC100046891</b>  | similar to Smad5                                                                   |
| ILMN_2844370 | 1.56 | <b>Ilvbl</b>         | ilvB (bacterial acetolactate synthase)-like                                        |
| ILMN_2844097 | 1.56 | <b>Foxn3</b>         | forkhead box N3                                                                    |
| ILMN_3102467 | 1.56 | <b>Rab34</b>         | RAB34, member of RAS oncogene family                                               |
| ILMN_2453209 | 1.56 | <b>Abhd11</b>        | abhydrolase domain containing 11                                                   |
| ILMN_2656511 | 1.56 | <b>Bbs7</b>          | Bardet-Biedl syndrome 7 (human)                                                    |
| ILMN_2653284 | 1.56 | <b>Ctns</b>          | cystinosis, nephropathic                                                           |
| ILMN_1236312 | 1.56 | <b>Snx14</b>         | sorting nexin 14                                                                   |
| ILMN_2765015 | 1.57 | <b>Eed</b>           | embryonic ectoderm development                                                     |
| ILMN_2709397 | 1.57 | <b>Eif2ak1</b>       | eukaryotic translation initiation factor 2 alpha kinase 1                          |
| ILMN_2806676 | 1.57 | <b>Acads</b>         | acyl-Coenzyme A dehydrogenase, short chain                                         |
| ILMN_2601884 | 1.57 | <b>Gpcpd1</b>        | glycerophosphocholine phosphodiesterase GDE1 homolog (S. cerevisiae)               |
| ILMN_2994108 | 1.57 | <b>Spsb3</b>         | spIA/ryanodine receptor domain and SOCS box containing 3                           |
| ILMN_2847024 | 1.57 | <b>Dph2</b>          | DPH2 homolog (S. cerevisiae)                                                       |
| ILMN_2733887 | 1.57 | <b>Mknk2</b>         | MAP kinase-interacting serine/threonine kinase 2                                   |
| ILMN_3005828 | 1.57 | <b>Mrps26</b>        | mitochondrial ribosomal protein S26                                                |
| ILMN_1258372 | 1.57 | <b>Pex11b</b>        | peroxisomal biogenesis factor 11 beta                                              |
| ILMN_2659467 | 1.57 | <b>Pitpnb</b>        | phosphatidylinositol transfer protein, beta                                        |
| ILMN_2755492 | 1.57 | <b>Fam3c</b>         | family with sequence similarity 3, member C                                        |
| ILMN_2473348 | 1.57 | <b>Ttc13</b>         | tetratricopeptide repeat domain 13                                                 |
| ILMN_3095462 | 1.57 | <b>Mfap3</b>         | microfibrillar-associated protein 3                                                |
| ILMN_2724191 | 1.57 | <b>Naa10</b>         | N(alpha)-acetyltransferase 10, NatA catalytic subunit                              |
| ILMN_1228762 | 1.57 | <b>Dvl1</b>          | dishevelled, dsh homolog 1 (Drosophila)                                            |
| ILMN_2588398 | 1.57 | <b>Impdh2</b>        | inosine 5'-phosphate dehydrogenase 2                                               |
| ILMN_2621882 | 1.57 | <b>0910001L09Rik</b> | RIKEN cDNA 0910001L09 gene                                                         |
| ILMN_1249578 | 1.57 | <b>Sorl1</b>         | sortilin-related receptor, LDLR class A repeats-containing                         |
| ILMN_2635801 | 1.57 | <b>2310079N02Rik</b> | RIKEN cDNA 2310079N02 gene                                                         |
| ILMN_2971946 | 1.57 | <b>Lsm5</b>          | LSM5 homolog, U6 small nuclear RNA associated (S. cerevisiae)                      |
| ILMN_2660082 | 1.57 | <b>1110007A13Rik</b> | RIKEN cDNA 1110007A13 gene                                                         |
| ILMN_2706051 | 1.57 | <b>Ccdc47</b>        | coiled-coil domain containing 47                                                   |
| ILMN_2943476 | 1.57 | <b>Lcmt1</b>         | leucine carboxyl methyltransferase 1                                               |
| ILMN_1244991 | 1.57 | <b>Fbxo21</b>        | F-box protein 21                                                                   |
| ILMN_2899787 | 1.57 | <b>Rgl2</b>          | ral guanine nucleotide dissociation stimulator-like 2                              |
| ILMN_2654568 | 1.58 | <b>Trub1</b>         | TruB pseudouridine (psi) synthase homolog 1 (E. coli)                              |
| ILMN_1254705 | 1.58 | <b>Atp5d</b>         | ATP synthase, H <sup>+</sup> transporting, mitochondrial F1 complex, delta subunit |
| ILMN_2716511 | 1.58 | <b>Slc12a6</b>       | solute carrier family 12, member 6                                                 |
| ILMN_2998548 | 1.58 | <b>Pycr2</b>         | pyrroline-5-carboxylate reductase family, member 2                                 |



|              |      |                      |                                                                              |
|--------------|------|----------------------|------------------------------------------------------------------------------|
| ILMN_2681492 | 1.58 | <b>Lztr1</b>         | leucine-zipper-like transcriptional regulator, 1                             |
| ILMN_1216072 | 1.58 | <b>Gtbbp4</b>        | GTP binding protein 4                                                        |
| ILMN_2700059 | 1.58 | <b>Slc12a2</b>       | solute carrier family 12, member 2                                           |
| ILMN_1217061 | 1.58 | <b>Casp9</b>         | caspase 9                                                                    |
| ILMN_2751925 | 1.58 | <b>Dpp3</b>          | dipeptidylpeptidase 3                                                        |
| ILMN_2735157 | 1.58 | <b>Eif3a</b>         | eukaryotic translation initiation factor 3, subunit A                        |
| ILMN_2614778 | 1.58 | <b>Slc30a5</b>       | solute carrier family 30 (zinc transporter), member 5                        |
| ILMN_2662283 | 1.58 | <b>2010007H12Rik</b> | RIKEN cDNA 2010007H12 gene                                                   |
| ILMN_2742293 | 1.58 | <b>Fam58b</b>        | family with sequence similarity 58, member B                                 |
| ILMN_1232762 | 1.58 | <b>Atox1</b>         | ATX1 (antioxidant protein 1) homolog 1 (yeast)                               |
| ILMN_2962511 | 1.58 | <b>Gorasp1</b>       | golgi reassembly stacking protein 1                                          |
| ILMN_2513849 | 1.58 | <b>Cul5</b>          | cullin 5                                                                     |
| ILMN_2627350 | 1.58 | <b>Magoh</b>         | mago-nashi homolog, proliferation-associated (Drosophila)                    |
| ILMN_2981821 | 1.58 | <b>Mrps7</b>         | mitochondrial ribosomal protein S7                                           |
| ILMN_2882820 | 1.59 | <b>Oraov1</b>        | oral cancer overexpressed 1                                                  |
| ILMN_2960308 | 1.59 | <b>Hspe1</b>         | heat shock protein 1 (chaperonin 10)                                         |
| ILMN_2755782 | 1.59 | <b>Nob1</b>          | NIN1/RPN12 binding protein 1 homolog (S. cerevisiae)                         |
| ILMN_2669441 | 1.59 | <b>Eftud2</b>        | elongation factor Tu GTP binding domain containing 2                         |
| ILMN_2986899 | 1.59 | <b>Adk</b>           | adenosine kinase                                                             |
| ILMN_1237846 | 1.59 | <b>LOC100044087</b>  | similar to brain protein 44                                                  |
| ILMN_1252919 | 1.59 | <b>Lman2</b>         | lectin, mannose-binding 2                                                    |
| ILMN_2685487 | 1.59 | <b>Edc4</b>          | enhancer of decapping 4                                                      |
| ILMN_2607786 | 1.59 | <b>Fads1</b>         | fatty acid desaturase 1                                                      |
| ILMN_3161021 | 1.59 | <b>Prkra</b>         | protein kinase, interferon inducible double stranded RNA dependent activator |
| ILMN_1243499 | 1.59 | <b>Ide</b>           | insulin degrading enzyme                                                     |
| ILMN_1219067 | 1.59 | <b>A830007P12Rik</b> | RIKEN cDNA A830007P12 gene                                                   |
| ILMN_3162431 | 1.59 | <b>Al846148</b>      | expressed sequence Al846148                                                  |
| ILMN_1229993 | 1.59 | <b>Dnajc12</b>       | DnaJ (Hsp40) homolog, subfamily C, member 12                                 |
| ILMN_1237891 | 1.59 | <b>Ap2a2</b>         | adaptor protein complex AP-2, alpha 2 subunit                                |
| ILMN_2611728 | 1.59 | <b>Srsf6</b>         | serine/arginine-rich splicing factor 6                                       |
| ILMN_2734511 | 1.59 | <b>Ndufb3</b>        | NADH dehydrogenase (ubiquinone) 1 beta subcomplex 3                          |
| ILMN_2720763 | 1.59 | <b>Ftsjd1</b>        | FtsJ methyltransferase domain containing 1                                   |
| ILMN_1238227 | 1.59 | <b>Rpl23</b>         | ribosomal protein L23                                                        |
| ILMN_2769696 | 1.59 | <b>Nap114</b>        | nucleosome assembly protein 1-like 4                                         |
| ILMN_2617335 | 1.59 | <b>Ndufb5</b>        | NADH dehydrogenase (ubiquinone) 1 beta subcomplex, 5                         |
| ILMN_1229082 | 1.59 | <b>Klhl21</b>        | kelch-like 21 (Drosophila)                                                   |
| ILMN_2679513 | 1.59 | <b>Rab40c</b>        | Rab40c, member RAS oncogene family                                           |
| ILMN_2804622 | 1.59 | <b>Med25</b>         | mediator of RNA polymerase II transcription, subunit 25 homolog (yeast)      |
| ILMN_3084818 | 1.59 | <b>Nr2c2ap</b>       | nuclear receptor 2C2-associated protein                                      |
| ILMN_1225264 | 1.59 | <b>0610007C21RIK</b> |                                                                              |
| ILMN_1225056 | 1.59 | <b>Slc5a6</b>        | solute carrier family 5 (sodium-dependent vitamin transporter), member 6     |
| ILMN_2608238 | 1.59 | <b>Dnaja3</b>        | DnaJ (Hsp40) homolog, subfamily A, member 3                                  |
| ILMN_2630730 | 1.59 | <b>Sf3a1</b>         | splicing factor 3a, subunit 1                                                |
| ILMN_1213531 | 1.59 | <b>Adipor1</b>       | adiponectin receptor 1                                                       |
| ILMN_1239742 | 1.59 | <b>Atp2a2</b>        | ATPase, Ca <sup>++</sup> transporting, cardiac muscle, slow twitch 2         |
| ILMN_2899318 | 1.60 | <b>Rdh11</b>         | retinol dehydrogenase 11                                                     |
| ILMN_2438771 | 1.60 | <b>Fubp3</b>         | far upstream element (FUSE) binding protein 3                                |
| ILMN_2691345 | 1.60 | <b>Bcs11</b>         | BCS1-like (yeast)                                                            |

|              |      |                      |                                                                               |
|--------------|------|----------------------|-------------------------------------------------------------------------------|
| ILMN_3112011 | 1.60 | <b>Dusp16</b>        | dual specificity phosphatase 16                                               |
| ILMN_3136809 | 1.60 | <b>Git2</b>          | G protein-coupled receptor kinase-interactor 2                                |
| ILMN_2864497 | 1.60 | <b>Ncdn</b>          | neurochondrin                                                                 |
| ILMN_3049650 | 1.60 | <b>Kcnk6</b>         | potassium inwardly-rectifying channel, subfamily K, member 6                  |
| ILMN_2908874 | 1.60 | <b>Ccdc132</b>       | coiled-coil domain containing 132                                             |
| ILMN_2638721 | 1.60 | <b>Csrnp2</b>        | cysteine-serine-rich nuclear protein 2                                        |
| ILMN_2852217 | 1.60 | <b>Gnpda1</b>        | glucosamine-6-phosphate deaminase 1                                           |
| ILMN_1247636 | 1.60 | <b>Ndfip2</b>        | Nedd4 family interacting protein 2                                            |
| ILMN_2907878 | 1.60 | <b>H2afx</b>         | H2A histone family, member X                                                  |
| ILMN_2925570 | 1.60 | <b>Nubp2</b>         | nucleotide binding protein 2                                                  |
| ILMN_2868482 | 1.60 | <b>Nadk</b>          | NAD kinase                                                                    |
| ILMN_2709820 | 1.60 | <b>Dtx2</b>          | deltex 2 homolog (Drosophila)                                                 |
| ILMN_1257060 | 1.60 | <b>Pla2g15</b>       | phospholipase A2, group XV                                                    |
| ILMN_3160107 | 1.60 | <b>Pik3r6</b>        | phosphoinositide-3-kinase, regulatory subunit 6                               |
| ILMN_2683128 | 1.60 | <b>Cmas</b>          | cytidine monophospho-N-acetylneuraminic acid synthetase                       |
| ILMN_1221703 | 1.60 | <b>Abca7</b>         | ATP-binding cassette, sub-family A (ABC1), member 7                           |
| ILMN_1258449 | 1.60 | <b>Zfp672</b>        | zinc finger protein 672                                                       |
| ILMN_2666483 | 1.60 | <b>Ruvbl1</b>        | RuvB-like protein 1                                                           |
| ILMN_1235979 | 1.60 | <b>Nop58</b>         | NOP58 ribonucleoprotein homolog (yeast)                                       |
| ILMN_2523256 | 1.60 | <b>1500001M20Rik</b> | RIKEN cDNA 1500001M20 gene                                                    |
| ILMN_2722488 | 1.60 | <b>Thumpd1</b>       | THUMP domain containing 1                                                     |
| ILMN_2715289 | 1.60 | <b>Exosc7</b>        | exosome component 7                                                           |
| ILMN_3014965 | 1.60 | <b>2610507B11Rik</b> | RIKEN cDNA 2610507B11 gene                                                    |
| ILMN_1246694 | 1.60 | <b>Dus1l</b>         | dihydrouridine synthase 1-like (S. cerevisiae)                                |
| ILMN_2842930 | 1.60 | <b>Polr3k</b>        | polymerase (RNA) III (DNA directed) polypeptide K                             |
| ILMN_2833378 | 1.60 | <b>Prkaca</b>        | protein kinase, cAMP dependent, catalytic, alpha                              |
| ILMN_1219168 | 1.60 | <b>Gpn1</b>          | GPN-loop GTPase 1                                                             |
| ILMN_1218384 | 1.61 | <b>Nfic</b>          | nuclear factor I/C                                                            |
| ILMN_1227458 | 1.61 | <b>Nuak1</b>         | NUAK family, SNF1-like kinase, 1                                              |
| ILMN_2968676 | 1.61 | <b>Timm44</b>        | translocase of inner mitochondrial membrane 44                                |
| ILMN_2781798 | 1.61 | <b>Gm561</b>         | predicted gene 561                                                            |
| ILMN_2689259 | 1.61 | <b>Pi4kb</b>         | phosphatidylinositol 4-kinase, catalytic, beta polypeptide                    |
| ILMN_1257078 | 1.61 | <b>Btbd1</b>         | BTB (POZ) domain containing 1                                                 |
| ILMN_2949605 | 1.61 | <b>Ubac2</b>         | ubiquitin associated domain containing 2                                      |
| ILMN_2749972 | 1.61 | <b>Phax</b>          | phosphorylated adaptor for RNA export                                         |
| ILMN_2709047 | 1.61 | <b>Polr1e</b>        | polymerase (RNA) I polypeptide E                                              |
| ILMN_2958076 | 1.61 | <b>Fmc1</b>          | formation of mitochondrial complexes 1 homolog (S. cerevisiae)                |
| ILMN_2711570 | 1.61 | <b>Ints3</b>         | integrator complex subunit 3                                                  |
| ILMN_2613546 | 1.61 | <b>Evi5</b>          | ecotropic viral integration site 5                                            |
| ILMN_2602938 | 1.61 | <b>Smpd13b</b>       | sphingomyelin phosphodiesterase, acid-like 3B                                 |
| ILMN_1221920 | 1.61 | <b>Plekhg3</b>       | pleckstrin homology domain containing, family G (with RhoGef domain) member 3 |
| ILMN_2600348 | 1.61 | <b>Sqle</b>          | squalene epoxidase                                                            |
| ILMN_1224546 | 1.61 | <b>Cul3</b>          | cullin 3                                                                      |
| ILMN_3154222 | 1.61 | <b>Ash2l</b>         | ash2 (absent, small, or homeotic)-like (Drosophila)                           |
| ILMN_2723438 | 1.61 | <b>Nubp2</b>         | nucleotide binding protein 2                                                  |
| ILMN_1219208 | 1.61 | <b>Nol6</b>          | nucleolar protein family 6 (RNA-associated)                                   |
| ILMN_2599412 | 1.61 | <b>Kti12</b>         | KTI12 homolog, chromatin associated (S. cerevisiae)                           |
| ILMN_3138743 | 1.61 | <b>Acsl3</b>         | acyl-CoA synthetase long-chain family member 3                                |

|              |      |                      |                                                                                              |
|--------------|------|----------------------|----------------------------------------------------------------------------------------------|
| ILMN_2781938 | 1.61 | <b>Tram1</b>         | translocating chain-associating membrane protein 1                                           |
| ILMN_1215644 | 1.61 | <b>LOC100047634</b>  | similar to Eukaryotic translation initiation factor 2 alpha kinase 3                         |
| ILMN_1223285 | 1.61 | <b>Hspa2</b>         | heat shock protein 2                                                                         |
| ILMN_1214036 | 1.61 | <b>Heatr1</b>        | HEAT repeat containing 1                                                                     |
| ILMN_2865239 | 1.61 | <b>Mrps18b</b>       | mitochondrial ribosomal protein S18B                                                         |
| ILMN_2870623 | 1.62 | <b>Zfp251</b>        | zinc finger protein 251                                                                      |
| ILMN_2788263 | 1.62 | <b>Ncbp2</b>         | nuclear cap binding protein subunit 2                                                        |
| ILMN_2755215 | 1.62 | <b>Mtmr12</b>        | myotubularin related protein 12                                                              |
| ILMN_2896601 | 1.62 | <b>Icam1</b>         | intercellular adhesion molecule 1                                                            |
| ILMN_1231439 | 1.62 | <b>Aatk</b>          | apoptosis-associated tyrosine kinase                                                         |
| ILMN_2672597 | 1.62 | <b>Gng10</b>         | guanine nucleotide binding protein (G protein), gamma 10                                     |
| ILMN_2685769 | 1.62 | <b>AW555464</b>      | Protein KIAA0284                                                                             |
| ILMN_1221611 | 1.62 | <b>Pitpna</b>        | phosphatidylinositol transfer protein, alpha                                                 |
| ILMN_2418426 | 1.62 | <b>Zmat3</b>         | zinc finger matrix type 3                                                                    |
| ILMN_2625047 | 1.62 | <b>Tprn</b>          | taperin                                                                                      |
| ILMN_2940559 | 1.62 | <b>Gbf1</b>          | golgi-specific brefeldin A-resistance factor 1                                               |
| ILMN_1229827 | 1.62 | <b>St7</b>           | suppression of tumorigenicity 7                                                              |
| ILMN_2760514 | 1.62 | <b>Agps</b>          | alkylglycerone phosphate synthase                                                            |
| ILMN_2612448 | 1.62 | <b>Nfat5</b>         | nuclear factor of activated T-cells 5                                                        |
| ILMN_1244147 | 1.62 | <b>Ak3</b>           | adenylate kinase 3                                                                           |
| ILMN_1243564 | 1.62 | <b>Plekha1</b>       | pleckstrin homology domain containing, family A (phosphoinositide binding specific) member 1 |
| ILMN_2988299 | 1.62 | <b>Srf</b>           | serum response factor                                                                        |
| ILMN_2845208 | 1.62 | <b>Lrpprc</b>        | leucine-rich PPR-motif containing                                                            |
| ILMN_2655429 | 1.62 | <b>Zfp12</b>         | zinc finger protein 12                                                                       |
| ILMN_2954858 | 1.62 | <b>Kifap3</b>        | kinesin-associated protein 3                                                                 |
| ILMN_2649654 | 1.62 | <b>Mrm1</b>          | mitochondrial rRNA methyltransferase 1 homolog (S. cerevisiae)                               |
| ILMN_1213456 | 1.62 | <b>Dhrs7</b>         | dehydrogenase/reductase (SDR family) member 7                                                |
| ILMN_1240471 | 1.62 | <b>Retsat</b>        | retinol saturase (all trans retinol 13,14 reductase)                                         |
| ILMN_3113639 | 1.62 | <b>Cant1</b>         | calcium activated nucleotidase 1                                                             |
| ILMN_1254488 | 1.63 | <b>Mgrn1</b>         | mahogunin, ring finger 1                                                                     |
| ILMN_2428963 | 1.63 | <b>Xpnpep1</b>       | X-prolyl aminopeptidase (aminopeptidase P) 1, soluble                                        |
| ILMN_2770759 | 1.63 | <b>Cdk2</b>          | cyclin-dependent kinase 2                                                                    |
| ILMN_2855334 | 1.63 | <b>Gusb</b>          | glucuronidase, beta                                                                          |
| ILMN_2911760 | 1.63 | <b>Ubac1</b>         | ubiquitin associated domain containing 1                                                     |
| ILMN_2631994 | 1.63 | <b>Hexim1</b>        | hexamethylene bis-acetamide inducible 1                                                      |
| ILMN_2766780 | 1.63 | <b>Lyz2</b>          | lysozyme 2                                                                                   |
| ILMN_3139668 | 1.63 | <b>Cpsf1</b>         | cleavage and polyadenylation specific factor 1                                               |
| ILMN_2746924 | 1.63 | <b>Cherp</b>         | calcium homeostasis endoplasmic reticulum protein                                            |
| ILMN_1259132 | 1.63 | <b>Osbp12</b>        | oxysterol binding protein-like 2                                                             |
| ILMN_2619861 | 1.63 | <b>Nipsnap1</b>      | 4-nitrophenylphosphatase domain and non-neuronal SNAP25-like protein homolog 1 (C. elegans)  |
| ILMN_2417316 | 1.63 | <b>LOC100044322</b>  | hypothetical LOC100044322                                                                    |
| ILMN_1222829 | 1.63 | <b>Ints1</b>         | integrator complex subunit 1                                                                 |
| ILMN_2831491 | 1.63 | <b>Pwp2</b>          | PWP2 periodic tryptophan protein homolog (yeast)                                             |
| ILMN_2900944 | 1.63 | <b>Nek9</b>          | NIMA (never in mitosis gene a)-related expressed kinase 9                                    |
| ILMN_2711651 | 1.63 | <b>Tmco1</b>         | transmembrane and coiled-coil domains 1                                                      |
| ILMN_2777598 | 1.63 | <b>Nr2f6</b>         | nuclear receptor subfamily 2, group F, member 6                                              |
| ILMN_1229378 | 1.63 | <b>Hbs1l</b>         | Hbs1-like (S. cerevisiae)                                                                    |
| ILMN_3088934 | 1.63 | <b>2700094K13Rik</b> | RIKEN cDNA 2700094K13 gene                                                                   |

|              |      |                      |                                                                                                  |
|--------------|------|----------------------|--------------------------------------------------------------------------------------------------|
| ILMN_2605417 | 1.63 | <b>4933411K20Rik</b> | RIKEN cDNA 4933411K20 gene                                                                       |
| ILMN_2769680 | 1.63 | <b>Retsat</b>        | retinol saturase (all trans retinol 13,14 reductase)                                             |
| ILMN_3162081 | 1.63 | <b>Wdr6</b>          | WD repeat domain 6                                                                               |
| ILMN_2701501 | 1.63 | <b>Ncaph2</b>        | non-SMC condensin II complex, subunit H2                                                         |
| ILMN_1251870 | 1.64 | <b>Smarcad1</b>      | SWI/SNF-related, matrix-associated actin-dependent regulator of chromatin, subf. a, cont. DEAD/H |
| ILMN_2756686 | 1.64 | <b>1110057K04Rik</b> | RIKEN cDNA 1110057K04 gene                                                                       |
| ILMN_1237197 | 1.64 | <b>Nrp1</b>          | neuropilin 1                                                                                     |
| ILMN_2791121 | 1.64 | <b>Ak3</b>           | adenylate kinase 3                                                                               |
| ILMN_2476139 | 1.64 | <b>Tuba1C</b>        | tubulin, alpha 1C                                                                                |
| ILMN_2925567 | 1.64 | <b>Nubp2</b>         | nucleotide binding protein 2                                                                     |
| ILMN_2944601 | 1.64 | <b>Pisd-ps1</b>      | phosphatidylserine decarboxylase, pseudogene 1                                                   |
| ILMN_3160361 | 1.64 | <b>Pik3r6</b>        | phosphoinositide-3-kinase, regulatory subunit 6                                                  |
| ILMN_1254437 | 1.64 | <b>Slc31a1</b>       | solute carrier family 31, member 1                                                               |
| ILMN_2701851 | 1.64 | <b>Ncapd3</b>        | non-SMC condensin II complex, subunit D3                                                         |
| ILMN_2742849 | 1.64 | <b>Mcm5</b>          | minichromosome maintenance deficient 5, cell division cycle 46 ( <i>S. cerevisiae</i> )          |
| ILMN_1231228 | 1.64 | <b>Ralbp1</b>        | ralA binding protein 1                                                                           |
| ILMN_1223551 | 1.64 | <b>Rrp9</b>          | RRP9, small subunit (SSU) processome component, homolog (yeast)                                  |
| ILMN_2679447 | 1.64 | <b>Agxt2l2</b>       | alanine-glyoxylate aminotransferase 2-like 2                                                     |
| ILMN_2616215 | 1.64 | <b>Letmd1</b>        | LETM1 domain containing 1                                                                        |
| ILMN_2680665 | 1.64 | <b>1810049H13Rik</b> | RIKEN cDNA 1810049H13 gene                                                                       |
| ILMN_2612255 | 1.64 | <b>Lyl1</b>          | lymphoblastomic leukemia 1                                                                       |
| ILMN_2899788 | 1.64 | <b>Rgl2</b>          | ral guanine nucleotide dissociation stimulator-like 2                                            |
| ILMN_2957589 | 1.64 | <b>Toe1</b>          | target of EGR1, member 1 (nuclear)                                                               |
| ILMN_2671738 | 1.64 | <b>Il16</b>          | interleukin 16                                                                                   |
| ILMN_1232170 | 1.64 | <b>Creld1</b>        | cysteine-rich with EGF-like domains 1                                                            |
| ILMN_2771396 | 1.64 | <b>Prkg1</b>         | protein kinase, AMP-activated, gamma 1 non-catalytic subunit                                     |
| ILMN_1236906 | 1.65 | <b>Cdkn2aipnl</b>    | CDKN2A interacting protein N-terminal like                                                       |
| ILMN_2805339 | 1.65 | <b>Hspb6</b>         | heat shock protein, alpha-crystallin-related, B6                                                 |
| ILMN_1219088 | 1.65 | <b>Anapc16</b>       | anaphase promoting complex subunit 16                                                            |
| ILMN_1254179 | 1.65 | <b>Rap2b</b>         | RAP2B, member of RAS oncogene family                                                             |
| ILMN_2725370 | 1.65 | <b>Map3k12</b>       | mitogen-activated protein kinase kinase kinase 12                                                |
| ILMN_2697693 | 1.65 | <b>Grhpr</b>         | glyoxylate reductase/hydroxypyruvate reductase                                                   |
| ILMN_2691493 | 1.65 | <b>Sssca1</b>        | Sjogren's syndrome/scleroderma autoantigen 1 homolog (human)                                     |
| ILMN_2707694 | 1.65 | <b>D10Wsu102e</b>    | DNA segment, Chr 10, Wayne State University 102, expressed                                       |
| ILMN_2912111 | 1.65 | <b>D10627</b>        | cDNA sequence D10627                                                                             |
| ILMN_2959372 | 1.65 | <b>Clec4b1</b>       | C-type lectin domain family 4, member b1                                                         |
| ILMN_2862567 | 1.65 | <b>Fndc3b</b>        | fibronectin type III domain containing 3B                                                        |
| ILMN_2608613 | 1.65 | <b>D10Wsu52e</b>     | DNA segment, Chr 10, Wayne State University 52, expressed                                        |
| ILMN_2695793 | 1.65 | <b>Fes</b>           | feline sarcoma oncogene                                                                          |
| ILMN_2604070 | 1.65 | <b>Celsr3</b>        | cadherin, EGF LAG seven-pass G-type receptor 3 (flamingo homolog, <i>Drosophila</i> )            |
| ILMN_2972371 | 1.65 | <b>Paf1</b>          | Paf1, RNA polymerase II associated factor, homolog ( <i>S. cerevisiae</i> )                      |
| ILMN_1259277 | 1.65 | <b>Ddx28</b>         | DEAD (Asp-Glu-Ala-Asp) box polypeptide 28                                                        |
| ILMN_2848090 | 1.65 | <b>Naa15</b>         | N(alpha)-acetyltransferase 15, NatA auxiliary subunit                                            |
| ILMN_2958484 | 1.65 | <b>Nlr1</b>          | NLR family member X1                                                                             |
| ILMN_1235751 | 1.65 | <b>Dus1l</b>         | dihydrouridine synthase 1-like ( <i>S. cerevisiae</i> )                                          |
| ILMN_2596522 | 1.65 | <b>Mt1</b>           | metallothionein 1                                                                                |
| ILMN_2706014 | 1.65 | <b>2010002N04Rik</b> | RIKEN cDNA 2010002N04 gene                                                                       |
| ILMN_2677567 | 1.65 | <b>Galt</b>          | galactose-1-phosphate uridylyl transferase                                                       |

|              |      |                      |                                                                                  |
|--------------|------|----------------------|----------------------------------------------------------------------------------|
| ILMN_2800256 | 1.65 | <b>Heatr1</b>        | HEAT repeat containing 1                                                         |
| ILMN_2720836 | 1.66 | <b>Rbm47</b>         | RNA binding motif protein 47                                                     |
| ILMN_2626389 | 1.66 | <b>Nomo1</b>         | nodal modulator 1                                                                |
| ILMN_3163211 | 1.66 | <b>Tmem107</b>       | transmembrane protein 107                                                        |
| ILMN_2965417 | 1.66 | <b>Npm3-ps1</b>      | nucleoplasmin 3, pseudogene 1                                                    |
| ILMN_2679937 | 1.66 | <b>LOC100046056</b>  | similar to Pre-B-cell leukemia transcription factor interacting protein 1        |
| ILMN_2889274 | 1.66 | <b>Snx14</b>         | sorting nexin 14                                                                 |
| ILMN_1242881 | 1.66 | <b>Cnpy2</b>         | canopy 2 homolog (zebrafish)                                                     |
| ILMN_1237507 | 1.66 | <b>Dist</b>          | dihydrolipoamide S-succinyltransferase (E2 component of 2-oxo-glutarate complex) |
| ILMN_2833936 | 1.66 | <b>Cry11</b>         | crystallin, lambda 1                                                             |
| ILMN_1213026 | 1.66 | <b>Cnst</b>          | consortin, connexin sorting protein                                              |
| ILMN_1250771 | 1.66 | <b>Prdxd1</b>        | PrdX-deacylase domain 1                                                          |
| ILMN_2655144 | 1.66 | <b>Lmf1</b>          | lipase maturation factor 1                                                       |
| ILMN_2985053 | 1.66 | <b>Ndufv2</b>        | NADH dehydrogenase (ubiquinone) flavoprotein 2                                   |
| ILMN_1234604 | 1.66 | <b>2610036D13Rik</b> | RIKEN cDNA 2610036D13 gene                                                       |
| ILMN_2787844 | 1.66 | <b>Serinc3</b>       | serine incorporator 3                                                            |
| ILMN_2617305 | 1.66 | <b>Nudt8</b>         | nudix (nucleoside diphosphate linked moiety X)-type motif 8                      |
| ILMN_2808355 | 1.66 | <b>Coq5</b>          | coenzyme Q5 homolog, methyltransferase (yeast)                                   |
| ILMN_2624749 | 1.66 | <b>Ankrd10</b>       | ankyrin repeat domain 10                                                         |
| ILMN_2973925 | 1.66 | <b>Pop5</b>          | processing of precursor 5, ribonuclease P/MRP family (S. cerevisiae)             |
| ILMN_2795698 | 1.66 | <b>Paox</b>          | polyamine oxidase (exo-N4-amino)                                                 |
| ILMN_1220275 | 1.66 | <b>Nrg4</b>          | neuregulin 4                                                                     |
| ILMN_2885532 | 1.67 | <b>Cpt2</b>          | carnitine palmitoyltransferase 2                                                 |
| ILMN_1225226 | 1.67 | <b>Gart</b>          | phosphoribosylglycinamide formyltransferase                                      |
| ILMN_2612369 | 1.67 | <b>Prpf8</b>         | pre- processing factor 8                                                         |
| ILMN_2713841 | 1.67 | <b>Hspd1</b>         | heat shock protein 1 (chaperonin)                                                |
| ILMN_2500276 | 1.67 | <b>Ccng1</b>         | cyclin G1                                                                        |
| ILMN_1231996 | 1.67 | <b>Pip4k2b</b>       | phosphatidylinositol-5-phosphate 4-kinase, type II, beta                         |
| ILMN_2739843 | 1.67 | <b>Metrn</b>         | meteorin, glial cell differentiation regulator                                   |
| ILMN_1222492 | 1.67 | <b>Mipep</b>         | mitochondrial intermediate peptidase                                             |
| ILMN_2930067 | 1.67 | <b>Eif2b5</b>        | eukaryotic translation initiation factor 2B, subunit 5 epsilon                   |
| ILMN_2686393 | 1.67 | <b>Gna12</b>         | guanine nucleotide binding protein, alpha 12                                     |
| ILMN_1244291 | 1.67 | <b>Gja1</b>          | gap junction protein, alpha 1                                                    |
| ILMN_2592810 | 1.67 | <b>Map3k3</b>        | mitogen-activated protein kinase kinase kinase 3                                 |
| ILMN_2717777 | 1.67 | <b>Polrmt</b>        | polymerase (RNA) mitochondrial (DNA directed)                                    |
| ILMN_2803334 | 1.67 | <b>Alg2</b>          | asparagine-linked glycosylation 2 homolog (yeast, alpha-1,3-mannosyltransferase) |
| ILMN_2915166 | 1.67 | <b>Ino80b</b>        | INO80 complex subunit B                                                          |
| ILMN_2910221 | 1.67 | <b>Mmgt1</b>         | membrane magnesium transporter 1                                                 |
| ILMN_1220440 | 1.67 | <b>Ppil3</b>         | peptidylprolyl isomerase (cyclophilin)-like 3                                    |
| ILMN_2744414 | 1.67 | <b>Nme3</b>          | non-metastatic cells 3, protein expressed in                                     |
| ILMN_2769656 | 1.67 | <b>Picalm</b>        | phosphatidylinositol binding clathrin assembly protein                           |
| ILMN_2973928 | 1.67 | <b>Pop5</b>          | processing of precursor 5, ribonuclease P/MRP family (S. cerevisiae)             |
| ILMN_1228470 | 1.67 | <b>Pdxp</b>          | pyridoxal (pyridoxine, vitamin B6) phosphatase                                   |
| ILMN_2771956 | 1.67 | <b>Calu</b>          | calumenin                                                                        |
| ILMN_2714874 | 1.67 | <b>Gm9897</b>        | predicted gene 9897                                                              |
| ILMN_2798674 | 1.67 | <b>2810046L04Rik</b> | RIKEN cDNA 2810046L04 gene                                                       |
| ILMN_2593496 | 1.67 | <b>Got2</b>          | glutamate oxaloacetate transaminase 2, mitochondrial                             |
| ILMN_2590950 | 1.67 | <b>Agtrap</b>        | angiotensin II, type I receptor-associated protein                               |

|              |      |                      |                                                                                       |
|--------------|------|----------------------|---------------------------------------------------------------------------------------|
| ILMN_1253677 | 1.67 | <b>Eml4</b>          | echinoderm microtubule associated protein like 4                                      |
| ILMN_2605453 | 1.67 | <b>Ranbp10</b>       | RAN binding protein 10                                                                |
| ILMN_2613558 | 1.67 | <b>Lass5</b>         | LAG1 homolog, ceramide synthase 5                                                     |
| ILMN_2769261 | 1.67 | <b>Ercc5</b>         | excision repair cross-complementing rodent repair deficiency, complementation group 5 |
| ILMN_2592266 | 1.67 | <b>Pqic1</b>         | PQ loop repeat containing 1                                                           |
| ILMN_2660028 | 1.67 | <b>Ccdc101</b>       | coiled-coil domain containing 101                                                     |
| ILMN_2614853 | 1.68 | <b>Trmt61a</b>       | tRNA methyltransferase 61 homolog A (S. cerevisiae)                                   |
| ILMN_2692315 | 1.68 | <b>Dpep2</b>         | dipeptidase 2                                                                         |
| ILMN_1253970 | 1.68 | <b>Sirt7</b>         | sirtuin 7 (silent mating type information regulation 2, homolog) 7                    |
| ILMN_2636335 | 1.68 | <b>Srsf2</b>         | serine/arginine-rich splicing factor 2                                                |
| ILMN_2791963 | 1.68 | <b>E2f6</b>          | E2F transcription factor 6                                                            |
| ILMN_2908780 | 1.68 | <b>Fam128b</b>       | family with sequence similarity 128, member B                                         |
| ILMN_2665422 | 1.68 | <b>Afg31</b>         | AFG3(ATPase family gene 3)-like 1 (yeast)                                             |
| ILMN_2746425 | 1.68 | <b>Slc35b4</b>       | solute carrier family 35, member B4                                                   |
| ILMN_2722513 | 1.68 | <b>Pstpip2</b>       | proline-serine-threonine phosphatase-interacting protein 2                            |
| ILMN_1218799 | 1.68 | <b>Emb</b>           | embigin                                                                               |
| ILMN_2911344 | 1.69 | <b>Plscr1</b>        | phospholipid scramblase 1                                                             |
| ILMN_1228937 | 1.69 | <b>Cyhr1</b>         | cysteine and histidine rich 1                                                         |
| ILMN_2702016 | 1.69 | <b>2010011I20Rik</b> | RIKEN cDNA 2010011I20 gene                                                            |
| ILMN_2908546 | 1.69 | <b>Arfgap1</b>       | ADP-ribosylation factor GTPase activating protein 1                                   |
| ILMN_3151840 | 1.69 | <b>Ppm1m</b>         | protein phosphatase 1M                                                                |
| ILMN_2944657 | 1.69 | <b>4930506M07Rik</b> | RIKEN cDNA 4930506M07 gene                                                            |
| ILMN_1259473 | 1.69 | <b>Fen1</b>          | flap structure specific endonuclease 1                                                |
| ILMN_2716085 | 1.69 | <b>Pex6</b>          | peroxisomal biogenesis factor 6                                                       |
| ILMN_1249606 | 1.69 | <b>Rpl71</b>         | ribosomal protein L7-like 1                                                           |
| ILMN_2749747 | 1.69 | <b>Haus8</b>         | 4HAUS augmin-like complex, subunit 8                                                  |
| ILMN_2605630 | 1.69 | <b>AA881470</b>      | EST AA881470                                                                          |
| ILMN_2730758 | 1.69 | <b>Ubr7</b>          | ubiquitin protein ligase E3 component n-recogin 7 (putative)                          |
| ILMN_3020829 | 1.69 | <b>Npm3</b>          | nucleoplasmin 3                                                                       |
| ILMN_2933756 | 1.69 | <b>Mycbp</b>         | c-myc binding protein                                                                 |
| ILMN_2665387 | 1.69 | <b>Coro1c</b>        | coronin, actin binding protein 1C                                                     |
| ILMN_1250767 | 1.69 | <b>Tpd52l2</b>       | tumor protein D52-like 2                                                              |
| ILMN_2736347 | 1.69 | <b>Prmt7</b>         | protein arginine N-methyltransferase 7                                                |
| ILMN_2787085 | 1.69 | <b>Spcs3</b>         | signal peptidase complex subunit 3 homolog (S. cerevisiae)                            |
| ILMN_2667614 | 1.69 | <b>Josd2</b>         | Josephin domain containing 2                                                          |
| ILMN_2816547 | 1.69 | <b>0610007P08Rik</b> | RIKEN cDNA 0610007P08 gene                                                            |
| ILMN_2775751 | 1.69 | <b>Tmem147</b>       | transmembrane protein 147                                                             |
| ILMN_1242769 | 1.69 | <b>Akap8l</b>        | A kinase (PRKA) anchor protein 8-like                                                 |
| ILMN_2901284 | 1.69 | <b>Add3</b>          | adducin 3 (gamma)                                                                     |
| ILMN_2989955 | 1.69 | <b>Bmp1</b>          | bone morphogenetic protein 1                                                          |
| ILMN_2742426 | 1.69 | <b>LOC100044204</b>  | hypothetical protein LOC100044204                                                     |
| ILMN_2735996 | 1.69 | <b>P4hb</b>          | prolyl 4-hydroxylase, beta polypeptide                                                |
| ILMN_2685464 | 1.69 | <b>Wwc2</b>          | WW, C2 and coiled-coil domain containing 2                                            |
| ILMN_1245918 | 1.70 | <b>Tab1</b>          | TGF-beta activated kinase 1/MAP3K7 binding protein 1                                  |
| ILMN_2462448 | 1.70 | <b>Tufm</b>          | Tu translation elongation factor, mitochondrial                                       |
| ILMN_2749037 | 1.70 | <b>Chchd10</b>       | coiled-coil-helix-coiled-coil-helix domain containing 10                              |
| ILMN_1248079 | 1.70 | <b>Zmpste24</b>      | zinc metallopeptidase, STE24 homolog (S. cerevisiae)                                  |
| ILMN_3140158 | 1.70 | <b>2700007P21Rik</b> | RIKEN cDNA 2700007P21 gene                                                            |

|              |      |                      |                                                                                           |
|--------------|------|----------------------|-------------------------------------------------------------------------------------------|
| ILMN_2931779 | 1.70 | <b>Wdr45l</b>        | Wdr45 like                                                                                |
| ILMN_2909105 | 1.70 | <b>Fam57a</b>        | family with sequence similarity 57, member A                                              |
| ILMN_2913326 | 1.70 | <b>2610039C10Rik</b> | RIKEN cDNA 2610039C10 gene                                                                |
| ILMN_1218891 | 1.70 | <b>Fahd1</b>         | fumarylacetoacetate hydrolase domain containing 1                                         |
| ILMN_2744193 | 1.70 | <b>Lrrc8a</b>        | leucine rich repeat containing 8A                                                         |
| ILMN_2669540 | 1.70 | <b>Cuta</b>          | cutA divalent cation tolerance homolog (E. coli)                                          |
| ILMN_3098120 | 1.70 | <b>Frrs1</b>         | ferric-chelate reductase 1                                                                |
| ILMN_1231705 | 1.70 | <b>Tmem48</b>        | transmembrane protein 48                                                                  |
| ILMN_2625167 | 1.70 | <b>Eif4g2</b>        | eukaryotic translation initiation factor 4, gamma 2                                       |
| ILMN_2472504 | 1.70 | <b>Pcyox1</b>        | prenylcysteine oxidase 1                                                                  |
| ILMN_2810047 | 1.71 | <b>Iars</b>          | isoleucine-tRNA synthetase                                                                |
| ILMN_2934533 | 1.71 | <b>Prpf19</b>        | PRP19/PSO4 pre- processing factor 19 homolog (S. cerevisiae)                              |
| ILMN_1254927 | 1.71 | <b>Ly6c1</b>         | lymphocyte antigen 6 complex, locus C1                                                    |
| ILMN_1230991 | 1.71 | <b>Gm10039</b>       | ATP synthase, H <sup>+</sup> transporting, mitochondrial F0 complex, subunit c, isoform 1 |
| ILMN_2989257 | 1.71 | <b>Qars</b>          | glutamyl-tRNA synthetase                                                                  |
| ILMN_2718974 | 1.71 | <b>Rpsud4</b>        | RNA pseudouridylate synthase domain containing 4                                          |
| ILMN_2874443 | 1.71 | <b>Polr2h</b>        | polymerase (RNA) II (DNA directed) polypeptide H                                          |
| ILMN_2963974 | 1.71 | <b>Gemin4</b>        | gem (nuclear organelle) associated protein 4                                              |
| ILMN_1259368 | 1.71 | <b>Apobec3</b>       | apolipoprotein B editing enzyme, catalytic polypeptide 3                                  |
| ILMN_2594768 | 1.71 | <b>Tha1</b>          | threonine aldolase 1                                                                      |
| ILMN_1249417 | 1.71 | <b>Pdrg1</b>         | p53 and DNA damage regulated 1                                                            |
| ILMN_2597886 | 1.71 | <b>Snx18</b>         | sorting nexin 18                                                                          |
| ILMN_2648089 | 1.71 | <b>Snx25</b>         | sorting nexin 25                                                                          |
| ILMN_2788574 | 1.71 | <b>Gmip</b>          | Gem-interacting protein                                                                   |
| ILMN_1255834 | 1.71 | <b>Stk17b</b>        | serine/threonine kinase 17b (apoptosis-inducing)                                          |
| ILMN_2867427 | 1.71 | <b>Rad50</b>         | RAD50 homolog (S. cerevisiae)                                                             |
| ILMN_1238733 | 1.71 | <b>Ttc27</b>         | tetratricopeptide repeat domain 27                                                        |
| ILMN_2769393 | 1.71 | <b>Mib2</b>          | mindbomb homolog 2 (Drosophila)                                                           |
| ILMN_1257772 | 1.71 | <b>BC026590</b>      | cDNA sequence BC026590                                                                    |
| ILMN_1226366 | 1.71 | <b>Uck1</b>          | uridine-cytidine kinase 1                                                                 |
| ILMN_1218993 | 1.71 | <b>Polr3h</b>        | polymerase (RNA) III (DNA directed) polypeptide H                                         |
| ILMN_2738156 | 1.71 | <b>Zfp362</b>        | zinc finger protein 362                                                                   |
| ILMN_1225995 | 1.71 | <b>Morc2a</b>        | microrchidia 2A                                                                           |
| ILMN_2707245 | 1.72 | <b>Rfwd2</b>         | ring finger and WD repeat domain 2                                                        |
| ILMN_2915059 | 1.72 | <b>Dgkz</b>          | diacylglycerol kinase zeta                                                                |
| ILMN_2892904 | 1.72 | <b>Aagab</b>         | alpha- and gamma-adaptin binding protein                                                  |
| ILMN_2724322 | 1.72 | <b>Cirrh1a</b>       | cirrhosis, autosomal recessive 1A (human)                                                 |
| ILMN_2652518 | 1.72 | <b>Atg2b</b>         | ATG2 autophagy related 2 homolog B (S. cerevisiae)                                        |
| ILMN_1236232 | 1.72 | <b>Acap3</b>         | ArfGAP with coiled-coil, ankyrin repeat and PH domains 3                                  |
| ILMN_1219667 | 1.72 | <b>Pfdn2</b>         | prefoldin 2                                                                               |
| ILMN_2610973 | 1.72 | <b>Clock</b>         | circadian locomotor output cycles kaput                                                   |
| ILMN_2685133 | 1.72 | <b>1700034H14Rik</b> | RIKEN cDNA 1700034H14 gene                                                                |
| ILMN_1221363 | 1.72 | <b>Orc5l</b>         | origin recognition complex, subunit 5-like (S. cerevisiae)                                |
| ILMN_2669699 | 1.72 | <b>Gm15431</b>       | predicted gene 15431                                                                      |
| ILMN_2983093 | 1.72 | <b>Prmt5</b>         | protein arginine N-methyltransferase 5                                                    |
| ILMN_2507286 | 1.72 | <b>Tnfsf13b</b>      | tumor necrosis factor (ligand) superfamily, member 13b                                    |
| ILMN_1227012 | 1.72 | <b>Ndufb4</b>        | NADH dehydrogenase (ubiquinone) 1 beta subcomplex 4                                       |
| ILMN_1224336 | 1.72 | <b>Spsb1</b>         | splA/ryanodine receptor domain and SOCS box containing 1                                  |

|              |      |                      |                                                                                 |
|--------------|------|----------------------|---------------------------------------------------------------------------------|
| ILMN_1238928 | 1.73 | <b>Mlst8</b>         | MTOR associated protein, LST8 homolog ( <i>S. cerevisiae</i> )                  |
| ILMN_2607196 | 1.73 | <b>Fam49b</b>        | family with sequence similarity 49, member B                                    |
| ILMN_2701741 | 1.73 | <b>Dph2</b>          | DPH2 homolog ( <i>S. cerevisiae</i> )                                           |
| ILMN_2720180 | 1.73 | <b>Cyb5b</b>         | cytochrome b5 type B                                                            |
| ILMN_1231471 | 1.73 | <b>Zfp94</b>         | zinc finger protein 94                                                          |
| ILMN_2907322 | 1.73 | <b>Dtx2</b>          | deltex 2 homolog ( <i>Drosophila</i> )                                          |
| ILMN_2895177 | 1.73 | <b>Epm2aip1</b>      | EPM2A (laforin) interacting protein 1                                           |
| ILMN_2712075 | 1.73 | <b>Lcn2</b>          | lipocalin 2                                                                     |
| ILMN_1246018 | 1.73 | <b>Klhl22</b>        | kelch-like 22 ( <i>Drosophila</i> )                                             |
| ILMN_2769285 | 1.73 | <b>Sema6B</b>        | sema domain, transmembrane domain (TM), and cytoplasmic domain, (semaphorin) 6B |
| ILMN_1219106 | 1.73 | <b>Rrad</b>          | Ras-related associated with diabetes                                            |
| ILMN_2705361 | 1.73 | <b>Hsd17b11</b>      | hydroxysteroid (17-beta) dehydrogenase 11                                       |
| ILMN_2875251 | 1.73 | <b>Ang</b>           | angiogenin, ribonuclease, RNase A family, 5                                     |
| ILMN_2912318 | 1.73 | <b>Terf2</b>         | telomeric repeat binding factor 2                                               |
| ILMN_3006931 | 1.73 | <b>Mospd1</b>        | motile sperm domain containing 1                                                |
| ILMN_2702039 | 1.74 | <b>Cblb</b>          | Casitas B-lineage lymphoma b                                                    |
| ILMN_2592486 | 1.74 | <b>Pglyrp1</b>       | peptidoglycan recognition protein 1                                             |
| ILMN_2623064 | 1.74 | <b>Snx24</b>         | sorting nexin 24                                                                |
| ILMN_3060168 | 1.74 | <b>Ift140</b>        | intraflagellar transport 140 homolog ( <i>Chlamydomonas</i> )                   |
| ILMN_2740348 | 1.74 | <b>Rhot2</b>         | ras homolog gene family, member T2                                              |
| ILMN_2991545 | 1.74 | <b>D10Jhu81e</b>     | DNA segment, Chr 10, Johns Hopkins University 81 expressed                      |
| ILMN_3163340 | 1.74 | <b>Rbm45</b>         | RNA binding motif protein 45                                                    |
| ILMN_2436489 | 1.74 | <b>Vapb</b>          | vesicle-associated membrane protein, associated protein B and C                 |
| ILMN_2798340 | 1.74 | <b>Tmem63a</b>       | transmembrane protein 63a                                                       |
| ILMN_2745005 | 1.74 | <b>Gpn3</b>          | GPN-loop GTPase 3                                                               |
| ILMN_1256518 | 1.74 | <b>Akr7a5</b>        | aldo-keto reductase family 7, member A5 (aflatoxin aldehyde reductase)          |
| ILMN_2706853 | 1.74 | <b>Scamp1</b>        | secretory carrier membrane protein 1                                            |
| ILMN_2929553 | 1.74 | <b>Prpf38b</b>       | PRP38 pre- processing factor 38 (yeast) domain containing B                     |
| ILMN_1249999 | 1.74 | <b>Kdelc1</b>        | KDEL (Lys-Asp-Glu-Leu) containing 1                                             |
| ILMN_1227277 | 1.74 | <b>Ccpg1</b>         | cell cycle progression 1                                                        |
| ILMN_1260420 | 1.75 | <b>Suv420h2</b>      | suppressor of variegation 4-20 homolog 2 ( <i>Drosophila</i> )                  |
| ILMN_1254715 | 1.75 | <b>Mrpl37</b>        | mitochondrial ribosomal protein L37                                             |
| ILMN_3006644 | 1.75 | <b>Abi2</b>          | abl-interactor 2                                                                |
| ILMN_1225544 | 1.75 | <b>Slc19a1</b>       | solute carrier family 19 (sodium/hydrogen exchanger), member 1                  |
| ILMN_2627690 | 1.75 | <b>Hnrnp1</b>        | heterogeneous nuclear ribonucleoprotein L                                       |
| ILMN_1257102 | 1.75 | <b>Cecr5</b>         | cat eye syndrome chromosome region, candidate 5 homolog (human)                 |
| ILMN_1260593 | 1.75 | <b>1700052N19Rik</b> | RIKEN cDNA 1700052N19 gene                                                      |
| ILMN_1226514 | 1.75 | <b>Gab3</b>          | growth factor receptor bound protein 2-associated protein 3                     |
| ILMN_1259299 | 1.75 | <b>3110056O03Rik</b> | RIKEN cDNA 3110056O03 gene                                                      |
| ILMN_3123836 | 1.75 | <b>Nudt7</b>         | nudix (nucleoside diphosphate linked moiety X)-type motif 7                     |
| ILMN_2936476 | 1.75 | <b>Pycard</b>        | PYD and CARD domain containing                                                  |
| ILMN_2473122 | 1.75 | <b>Wrb</b>           | tryptophan rich basic protein                                                   |
| ILMN_2987863 | 1.75 | <b>Per2</b>          | period homolog 2 ( <i>Drosophila</i> )                                          |
| ILMN_2679851 | 1.75 | <b>Pdha1</b>         | pyruvate dehydrogenase E1 alpha 1                                               |
| ILMN_1226935 | 1.75 | <b>Orm1</b>          | orosomucoid 1                                                                   |
| ILMN_2653927 | 1.75 | <b>Limk1</b>         | LIM-domain containing, protein kinase                                           |
| ILMN_1224250 | 1.76 | <b>N4bp211</b>       | NEDD4 binding protein 2-like 1                                                  |
| ILMN_1217767 | 1.76 | <b>Glrx5</b>         | glutaredoxin 5 homolog ( <i>S. cerevisiae</i> )                                 |



|              |      |                           |                                                                     |
|--------------|------|---------------------------|---------------------------------------------------------------------|
| ILMN_2745433 | 1.76 | <b>Ergic1</b>             | endoplasmic reticulum-golgi intermediate compartment (ERGIC) 1      |
| ILMN_2895084 | 1.76 | <b>Zfp715</b>             | zinc finger protein 715                                             |
| ILMN_2671689 | 1.76 | <b>Cox7b</b>              | cytochrome c oxidase subunit VIIb                                   |
| ILMN_2975718 | 1.76 | <b>Rps6ka1</b>            | ribosomal protein S6 kinase polypeptide 1                           |
| ILMN_1225712 | 1.76 | <b>lap</b>                | intracisternal A particles                                          |
| ILMN_1235909 | 1.77 | <b>Ak2</b>                | adenylate kinase 2                                                  |
| ILMN_2614161 | 1.77 | <b>Lss</b>                | lanosterol synthase                                                 |
| ILMN_3141048 | 1.77 | <b>Sepp1</b>              | selenoprotein P, plasma, 1                                          |
| ILMN_1258830 | 1.77 | <b>Ppap2a</b>             | phosphatidic acid phosphatase type 2A                               |
| ILMN_1259339 | 1.77 | <b>Cdk5r1</b>             | cyclin-dependent kinase 5, regulatory subunit 1 (p35)               |
| ILMN_2969172 | 1.77 | <b>Tmem87a</b>            | transmembrane protein 87A                                           |
| ILMN_1214150 | 1.77 | <b>Gng2</b>               | guanine nucleotide binding protein (G protein), gamma 2             |
| ILMN_1253844 | 1.77 | <b>Orc5l</b>              | origin recognition complex, subunit 5-like ( <i>S. cerevisiae</i> ) |
| ILMN_2716014 | 1.77 | <b>OTTMUSG00000011448</b> | predicted gene, OTTMUSG00000011448                                  |
| ILMN_2466845 | 1.77 | <b>Trp53</b>              | transformation related protein 53                                   |
| ILMN_1221199 | 1.77 | <b>Ppm1f</b>              | protein phosphatase 1F (PP2C domain containing)                     |
| ILMN_2755981 | 1.77 | <b>Fam178a</b>            | family with sequence similarity 178, member A                       |
| ILMN_2735961 | 1.77 | <b>Tlr13</b>              | toll-like receptor 13                                               |
| ILMN_2589312 | 1.77 | <b>Entpd4</b>             | ectonucleoside triphosphate diphosphohydrolase 4                    |
| ILMN_1213855 | 1.78 | <b>Extl2</b>              | exostoses (multiple)-like 2                                         |
| ILMN_2508745 | 1.78 | <b>Zfyve21</b>            | zinc finger, FYVE domain containing 21                              |
| ILMN_2864290 | 1.78 | <b>Fam126b</b>            | family with sequence similarity 126, member B                       |
| ILMN_3090207 | 1.78 | <b>Cyp4f18</b>            | cytochrome P450, family 4, subfamily f, polypeptide 18              |
| ILMN_2977535 | 1.78 | <b>D930015E06Rik</b>      | RIKEN cDNA D930015E06 gene                                          |
| ILMN_2597899 | 1.78 | <b>Zfc3h1</b>             | zinc finger, C3H1-type containing                                   |
| ILMN_2737296 | 1.78 | <b>Lars2</b>              | leucyl-tRNA synthetase, mitochondrial                               |
| ILMN_2821916 | 1.78 | <b>Nicn1</b>              | nicolin 1                                                           |
| ILMN_2721929 | 1.78 | <b>Havcr2</b>             | hepatitis A virus cellular receptor 2                               |
| ILMN_1257624 | 1.78 | <b>Txn2</b>               | thioredoxin 2                                                       |
| ILMN_1238479 | 1.78 | <b>Mgst3</b>              | microsomal glutathione S-transferase 3                              |
| ILMN_2747031 | 1.79 | <b>DHCR24</b>             | 24-dehydrocholesterol reductase                                     |
| ILMN_2615035 | 1.79 | <b>Mgst3</b>              | microsomal glutathione S-transferase 3                              |
| ILMN_2671253 | 1.79 | <b>Gspt2</b>              | G1 to S phase transition 2                                          |
| ILMN_3007898 | 1.79 | <b>Kdm1b</b>              | lysine (K)-specific demethylase 1B                                  |
| ILMN_2721385 | 1.79 | <b>Dst</b>                | dystonin                                                            |
| ILMN_1222794 | 1.79 | <b>Ankrd46</b>            | ankyrin repeat domain 46                                            |
| ILMN_1257428 | 1.79 | <b>Fkbp4</b>              | FK506 binding protein 4                                             |
| ILMN_2714638 | 1.80 | <b>Mertk</b>              | c-mer proto-oncogene tyrosine kinase                                |
| ILMN_2795412 | 1.80 | <b>Tmem176a</b>           | transmembrane protein 176A                                          |
| ILMN_1217590 | 1.80 | <b>Sephs2</b>             | selenophosphate synthetase 2                                        |
| ILMN_2691492 | 1.80 | <b>Sssca1</b>             | Sjogren's syndrome/scleroderma autoantigen 1 homolog (human)        |
| ILMN_2595732 | 1.80 | <b>LOC100046232</b>       | similar to NFIL3/E4BP4 transcription factor                         |
| ILMN_1233064 | 1.80 | <b>Cdk2</b>               | cyclin-dependent kinase 2                                           |
| ILMN_2838492 | 1.80 | <b>Styx</b>               | serine/threonine/tyrosine interaction protein                       |
| ILMN_2667352 | 1.80 | <b>Glo1</b>               | glyoxalase 1                                                        |
| ILMN_2859847 | 1.80 | <b>Pygl</b>               | liver glycogen phosphorylase                                        |
| ILMN_1253601 | 1.80 | <b>Aacs</b>               | acetoacetyl-CoA synthetase                                          |
| ILMN_2962737 | 1.80 | <b>Aoah</b>               | acyloxyacyl hydrolase                                               |

|              |      |                      |                                                                                       |
|--------------|------|----------------------|---------------------------------------------------------------------------------------|
| ILMN_2825020 | 1.80 | <b>Rassf5</b>        | Ras association (RalGDS/AF-6) domain family member 5                                  |
| ILMN_3009334 | 1.80 | <b>Ncaph2</b>        | non-SMC condensin II complex, subunit H2                                              |
| ILMN_2752506 | 1.81 | <b>Sec22c</b>        | SEC22 vesicle trafficking protein homolog C ( <i>S. cerevisiae</i> )                  |
| ILMN_2915060 | 1.81 | <b>Dgkz</b>          | diacylglycerol kinase zeta                                                            |
| ILMN_2702704 | 1.81 | <b>Ndufv1</b>        | NADH dehydrogenase (ubiquinone) flavoprotein 1                                        |
| ILMN_2835346 | 1.81 | <b>Prpf18</b>        | PRP18 pre- processing factor 18 homolog (yeast)                                       |
| ILMN_2728118 | 1.81 | <b>Rrp12</b>         | ribosomal RNA processing 12 homolog ( <i>S. cerevisiae</i> )                          |
| ILMN_2868280 | 1.81 | <b>Dcxr</b>          | dicarbonyl L-xylulose reductase                                                       |
| ILMN_2587859 | 1.81 | <b>EG668837</b>      | predicted gene, EG668837                                                              |
| ILMN_2719296 | 1.82 | <b>Mfn1</b>          | mitofusin 1                                                                           |
| ILMN_1253008 | 1.82 | <b>Acat2</b>         | acetyl-Coenzyme A acetyltransferase 2                                                 |
| ILMN_1236828 | 1.82 | <b>Usp20</b>         | ubiquitin specific peptidase 20                                                       |
| ILMN_2647820 | 1.82 | <b>Apoc2</b>         | apolipoprotein C-II                                                                   |
| ILMN_1225654 | 1.82 | <b>LOC100046775</b>  | similar to CMP-sialic acid transporter                                                |
| ILMN_1260412 | 1.82 | <b>Tigd2</b>         | tigger transposable element derived 2                                                 |
| ILMN_2948143 | 1.82 | <b>Slc7a11</b>       | solute carrier family 7 (cationic amino acid transporter, y+ system), member 11       |
| ILMN_2599935 | 1.82 | <b>2610024G14Rik</b> | RIKEN cDNA 2610024G14 gene                                                            |
| ILMN_1218206 | 1.82 | <b>Klf13</b>         | Kruppel-like factor 13                                                                |
| ILMN_2501489 | 1.83 | <b>Was</b>           | Wiskott-Aldrich syndrome homolog (human)                                              |
| ILMN_2728385 | 1.83 | <b>Smc6</b>          | structural maintenance of chromosomes 6                                               |
| ILMN_1259904 | 1.83 | <b>Ercc4</b>         | excision repair cross-complementing rodent repair deficiency, complementation group 4 |
| ILMN_2709279 | 1.83 | <b>Tmem180</b>       | transmembrane protein 180                                                             |
| ILMN_1257019 | 1.84 | <b>BC037034</b>      | cDNA sequence BC037034                                                                |
| ILMN_1224487 | 1.84 | <b>Ddx26b</b>        | DEAD/H (Asp-Glu-Ala-Asp/His) box polypeptide 26B                                      |
| ILMN_2805829 | 1.84 | <b>Exosc2</b>        | exosome component 2                                                                   |
| ILMN_2475864 | 1.84 | <b>Ubp1</b>          | upstream binding protein 1                                                            |
| ILMN_2724795 | 1.84 | <b>Ppp5c</b>         | protein phosphatase 5, catalytic subunit                                              |
| ILMN_2645662 | 1.84 | <b>Tmem86a</b>       | transmembrane protein 86A                                                             |
| ILMN_1242246 | 1.84 | <b>Scamp5</b>        | secretory carrier membrane protein 5                                                  |
| ILMN_2953411 | 1.84 | <b>Ppp3r1</b>        | protein phosphatase 3, regulatory subunit B, alpha isoform (calcineurin B, type I)    |
| ILMN_2780424 | 1.84 | <b>Zfp36l1</b>       | zinc finger protein 36, C3H type-like 1                                               |
| ILMN_2682362 | 1.84 | <b>Gemin4</b>        | gem (nuclear organelle) associated protein 4                                          |
| ILMN_2794608 | 1.84 | <b>Bcat2</b>         | branched chain aminotransferase 2, mitochondrial                                      |
| ILMN_1246999 | 1.84 | <b>DDX18</b>         | similar to DEAD (Asp-Glu-Ala-Asp) box polypeptide 18                                  |
| ILMN_1214179 | 1.84 | <b>LOC100045551</b>  | similar to Protein phosphatase 1D magnesium-dependent, delta                          |
| ILMN_1222991 | 1.85 | <b>Ppap2a</b>        | phosphatidic acid phosphatase type 2A                                                 |
| ILMN_1252745 | 1.85 | <b>Gtf2h2</b>        | general transcription factor II H, polypeptide 2                                      |
| ILMN_3121522 | 1.85 | <b>Clec5a</b>        | C-type lectin domain family 5, member a                                               |
| ILMN_2668462 | 1.85 | <b>Emilin1</b>       | elastin microfibril interfacier 1                                                     |
| ILMN_1233889 | 1.85 | <b>Pno1</b>          | partner of NOB1 homolog ( <i>S. cerevisiae</i> )                                      |
| ILMN_2768026 | 1.85 | <b>Gusb</b>          | glucuronidase, beta                                                                   |
| ILMN_2647856 | 1.85 | <b>D330045A20Rik</b> | RIKEN cDNA D330045A20 gene                                                            |
| ILMN_1217408 | 1.85 | <b>Prkacb</b>        | protein kinase, cAMP dependent, catalytic, beta                                       |
| ILMN_2605819 | 1.85 | <b>Egln3</b>         | EGL nine homolog 3 ( <i>C. elegans</i> )                                              |
| ILMN_1251206 | 1.85 | <b>Yme11</b>         | YME1-like 1 ( <i>S. cerevisiae</i> )                                                  |
| ILMN_1258376 | 1.85 | <b>Kcnk6</b>         | potassium inwardly-rectifying channel, subfamily K, member 6                          |
| ILMN_1250001 | 1.86 | <b>4930583H14Rik</b> | RIKEN cDNA 4930583H14 gene                                                            |
| ILMN_1254692 | 1.86 | <b>Ms4a6b</b>        | membrane-spanning 4-domains, subfamily A, member 6B                                   |

|              |      |                      |                                                                                              |
|--------------|------|----------------------|----------------------------------------------------------------------------------------------|
| ILMN_2824723 | 1.86 | <b>Fxc1</b>          | fractured callus expressed transcript 1                                                      |
| ILMN_2709051 | 1.86 | <b>Fam126b</b>       | family with sequence similarity 126, member B                                                |
| ILMN_3105343 | 1.86 | <b>Adarb1</b>        | adenosine deaminase, RNA-specific, B1                                                        |
| ILMN_1233402 | 1.86 | <b>LOC100045981</b>  | similar to synaptotagmin XI                                                                  |
| ILMN_2794526 | 1.86 | <b>Cnr2</b>          | cannabinoid receptor 2 (macrophage)                                                          |
| ILMN_2681232 | 1.87 | <b>Ifi2711</b>       | interferon, alpha-inducible protein 27 like 1                                                |
| ILMN_2709166 | 1.87 | <b>Susd2</b>         | sushi domain containing 2                                                                    |
| ILMN_2981363 | 1.87 | <b>Emilin2</b>       | elastin microfibril interfacier 2                                                            |
| ILMN_2689056 | 1.87 | <b>Cd2bp2</b>        | CD2 antigen (cytoplasmic tail) binding protein 2                                             |
| ILMN_2721809 | 1.87 | <b>Mapk14</b>        | mitogen-activated protein kinase 14                                                          |
| ILMN_1230411 | 1.87 | <b>Kpnb1</b>         | karyopherin (importin) beta 1                                                                |
| ILMN_2593787 | 1.87 | <b>Kcnk13</b>        | potassium channel, subfamily K, member 13                                                    |
| ILMN_2965132 | 1.88 | <b>Tspyl3</b>        | TSPY-like 3                                                                                  |
| ILMN_2939303 | 1.88 | <b>Pcyt2</b>         | phosphate cytidyltransferase 2, ethanolamine                                                 |
| ILMN_3043669 | 1.88 | <b>Sla</b>           | src-like adaptor                                                                             |
| ILMN_2699307 | 1.88 | <b>Hebp1</b>         | heme binding protein 1                                                                       |
| ILMN_1234086 | 1.89 | <b>Dhdh</b>          | dihydrodiol dehydrogenase (dimeric)                                                          |
| ILMN_2733733 | 1.89 | <b>Tlr2</b>          | toll-like receptor 2                                                                         |
| ILMN_2640348 | 1.89 | <b>Tmem110</b>       | transmembrane protein 110                                                                    |
| ILMN_2624544 | 1.89 | <b>Helb</b>          | helicase (DNA) B                                                                             |
| ILMN_1237089 | 1.89 | <b>Ganab</b>         | alpha glucosidase 2 alpha neutral subunit                                                    |
| ILMN_1250538 | 1.90 | <b>Reep3</b>         | receptor accessory protein 3                                                                 |
| ILMN_2600389 | 1.90 | <b>Slc7a6</b>        | solute carrier family 7 (cationic amino acid transporter, y+ system), member 6               |
| ILMN_2847869 | 1.90 | <b>B230219D22Rik</b> | RIKEN cDNA B230219D22 gene                                                                   |
| ILMN_2852672 | 1.92 | <b>Tspan32</b>       | tetraspanin 32                                                                               |
| ILMN_2928160 | 1.92 | <b>Vars</b>          | valyl-tRNA synthetase                                                                        |
| ILMN_3150233 | 1.92 | <b>Abca3</b>         | ATP-binding cassette, sub-family A (ABC1), member 3                                          |
| ILMN_2633229 | 1.92 | <b>Atp5a1</b>        | ATP synthase, H+ transporting, mitochondrial F1 complex, alpha subunit 1                     |
| ILMN_2960822 | 1.92 | <b>BC085271</b>      | cDNA sequence BC085271                                                                       |
| ILMN_3151722 | 1.92 | <b>Net1</b>          | neuroepithelial cell transforming gene 1                                                     |
| ILMN_2845849 | 1.93 | <b>Xpr1</b>          | xenotropic and polytropic retrovirus receptor 1                                              |
| ILMN_2687403 | 1.93 | <b>Fcgr3</b>         | Fc receptor, IgG, low affinity III                                                           |
| ILMN_2971479 | 1.93 | <b>Trp53inp1</b>     | transformation related protein 53 inducible nuclear protein 1                                |
| ILMN_1247553 | 1.94 | <b>Sepp1</b>         | selenoprotein P, plasma, 1                                                                   |
| ILMN_1250704 | 1.94 | <b>Rcsd1</b>         | RCS domain containing 1                                                                      |
| ILMN_1217794 | 1.94 | <b>Timm9</b>         | translocase of inner mitochondrial membrane 9 homolog (yeast)                                |
| ILMN_1247853 | 1.94 | <b>Zfp3611</b>       | zinc finger protein 36, C3H type-like 1                                                      |
| ILMN_2809611 | 1.94 | <b>Srm</b>           | spermidine synthase                                                                          |
| ILMN_3065373 | 1.94 | <b>4930572J05Rik</b> | RIKEN cDNA 4930572J05 gene                                                                   |
| ILMN_3131063 | 1.94 | <b>Ccnd3</b>         | cyclin D3                                                                                    |
| ILMN_1248714 | 1.94 | <b>Cd55</b>          | CD55 antigen                                                                                 |
| ILMN_2708877 | 1.95 | <b>Plekha1</b>       | pleckstrin homology domain containing, family A (phosphoinositide binding specific) member 1 |
| ILMN_2734661 | 1.96 | <b>Hagh</b>          | hydroxyacyl glutathione hydrolase                                                            |
| ILMN_3083163 | 1.96 | <b>Cp</b>            | ceruloplasmin                                                                                |
| ILMN_2648661 | 1.96 | <b>Cap1</b>          | CAP, adenylate cyclase-associated protein 1 (yeast)                                          |
| ILMN_2753021 | 1.96 | <b>Rnf166</b>        | ring finger protein 166                                                                      |
| ILMN_2614889 | 1.97 | <b>B3gnt8</b>        | UDP-GlcNAc:betaGal beta-1,3-N-acetylglucosaminyltransferase 8                                |
| ILMN_3121784 | 1.97 | <b>Fam53b</b>        | family with sequence similarity 53, member B                                                 |

|              |      |                      |                                                                      |
|--------------|------|----------------------|----------------------------------------------------------------------|
| ILMN_1254929 | 1.97 | <b>Rcl1</b>          | RNA terminal phosphate cyclase-like 1                                |
| ILMN_1240445 | 1.98 | <b>Stard4</b>        | STAR-related lipid transfer (START) domain containing 4              |
| ILMN_2652757 | 1.98 | <b>Elov5</b>         | ELOVL family member 5, elongation of long chain fatty acids (yeast)  |
| ILMN_2589768 | 1.98 | <b>Htr2b</b>         | 5-hydroxytryptamine (serotonin) receptor 2B                          |
| ILMN_1216337 | 1.98 | <b>Sla</b>           | src-like adaptor                                                     |
| ILMN_2820948 | 1.98 | <b>Dbt</b>           | dihydrolipoamide branched chain transacylase E2                      |
| ILMN_2835461 | 1.99 | <b>2610024G14Rik</b> | RIKEN cDNA 2610024G14 gene                                           |
| ILMN_2790382 | 1.99 | <b>Gfi1</b>          | growth factor independent 1                                          |
| ILMN_3125606 | 1.99 | <b>Ifi2711</b>       | interferon, alpha-inducible protein 27 like 1                        |
| ILMN_2668197 | 2.00 | <b>Stau1</b>         | stau1 (RNA binding protein) homolog 1 (Drosophila)                   |
| ILMN_1229529 | 2.00 | <b>Hsd17b7</b>       | hydroxysteroid (17-beta) dehydrogenase 7                             |
| ILMN_3005212 | 2.00 | <b>Paip2b</b>        | poly(A) binding protein interacting protein 2B                       |
| ILMN_2729718 | 2.00 | <b>Psme3</b>         | proteasome (prosome, macropain) 28 subunit, 3                        |
| ILMN_2638147 | 2.01 | <b>Klhdc10</b>       | kelch domain containing 10                                           |
| ILMN_2906473 | 2.01 | <b>Mlst8</b>         | MTOR associated protein, LST8 homolog (S. cerevisiae)                |
| ILMN_2770066 | 2.01 | <b>LOC100044439</b>  | similar to cytochrome P450 CYP4F18                                   |
| ILMN_2895908 | 2.01 | <b>Txlng</b>         | taxilin gamma                                                        |
| ILMN_2836501 | 2.01 | <b>Rdh12</b>         | retinol dehydrogenase 12                                             |
| ILMN_2672528 | 2.01 | <b>Pabpn1</b>        | poly(A) binding protein, nuclear 1                                   |
| ILMN_2980532 | 2.01 | <b>Tgfb1</b>         | transforming growth factor, beta receptor I                          |
| ILMN_2611000 | 2.02 | <b>Il1r2</b>         | interleukin 1 receptor, type II                                      |
| ILMN_1235657 | 2.02 | <b>Rnase4</b>        | ribonuclease, RNase A family 4                                       |
| ILMN_2980177 | 2.02 | <b>Fhod1</b>         | formin homology 2 domain containing 1                                |
| ILMN_2674247 | 2.03 | <b>Cd38</b>          | CD38 antigen                                                         |
| ILMN_1240979 | 2.03 | <b>Rbm38</b>         | RNA binding motif protein 38                                         |
| ILMN_2679723 | 2.03 | <b>Tm2d2</b>         | TM2 domain containing 2                                              |
| ILMN_1258552 | 2.03 | <b>2610024G14Rik</b> | RIKEN cDNA 2610024G14 gene                                           |
| ILMN_1222036 | 2.03 | <b>Paqr7</b>         | progesterin and adipoQ receptor family member VII                    |
| ILMN_2868013 | 2.04 | <b>Pank1</b>         | pantothenate kinase 1                                                |
| ILMN_2825144 | 2.04 | <b>Fndc7</b>         | fibronectin type III domain containing 7                             |
| ILMN_2850402 | 2.05 | <b>Brp16</b>         | brain protein 16                                                     |
| ILMN_2610771 | 2.05 | <b>Net1</b>          | neuroepithelial cell transforming gene 1                             |
| ILMN_2801683 | 2.05 | <b>Dstn</b>          | destrin                                                              |
| ILMN_1259470 | 2.06 | <b>Tmem176b</b>      | transmembrane protein 176B                                           |
| ILMN_1245425 | 2.06 | <b>Atp2a2</b>        | ATPase, Ca <sup>++</sup> transporting, cardiac muscle, slow twitch 2 |
| ILMN_2737163 | 2.07 | <b>Sqle</b>          | squalene epoxidase                                                   |
| ILMN_2728729 | 2.07 | <b>Sdc4</b>          | syndecan 4                                                           |
| ILMN_2759079 | 2.07 | <b>Ppap2a</b>        | phosphatidic acid phosphatase type 2A                                |
| ILMN_2888144 | 2.08 | <b>Slc29a1</b>       | solute carrier family 29 (nucleoside transporters), member 1         |
| ILMN_2685157 | 2.09 | <b>Abcc3</b>         | ATP-binding cassette, sub-family C (CFTR/MRP), member 3              |
| ILMN_2745614 | 2.10 | <b>Fam134b</b>       | family with sequence similarity 134, member B                        |
| ILMN_2734142 | 2.10 | <b>Snta1</b>         | syntrophin, acidic 1                                                 |
| ILMN_1214810 | 2.11 | <b>Arf2</b>          | ADP-ribosylation factor 2                                            |
| ILMN_1250531 | 2.12 | <b>Slc19a2</b>       | solute carrier family 19 (thiamine transporter), member 2            |
| ILMN_2987862 | 2.12 | <b>Per2</b>          | period homolog 2 (Drosophila)                                        |
| ILMN_2667369 | 2.12 | <b>B4galt1</b>       | UDP-Gal:betaGlcNAc beta 1,4- galactosyltransferase, polypeptide 1    |
| ILMN_2752569 | 2.13 | <b>Paip1</b>         | polyadenylate binding protein-interacting protein 1                  |
| ILMN_2721149 | 2.13 | <b>Arl11</b>         | ADP-ribosylation factor-like 11                                      |

|              |      |                      |                                                                                                |
|--------------|------|----------------------|------------------------------------------------------------------------------------------------|
| ILMN_2665545 | 2.13 | <b>Rin3</b>          | Ras and Rab interactor 3                                                                       |
| ILMN_1250947 | 2.15 | <b>Txndc5</b>        | thioredoxin domain containing 5                                                                |
| ILMN_1231138 | 2.16 | <b>E2f1</b>          | E2F transcription factor 1                                                                     |
| ILMN_1238032 | 2.17 | <b>Fbxl5</b>         | F-box and leucine-rich repeat protein 5                                                        |
| ILMN_2480682 | 2.18 | <b>Sgms1</b>         | sphingomyelin synthase 1                                                                       |
| ILMN_2875169 | 2.18 | <b>6330416G13Rik</b> | RIKEN cDNA 6330416G13 gene                                                                     |
| ILMN_2473531 | 2.18 | <b>Pik3r1</b>        | phosphatidylinositol 3-kinase, regulatory subunit, polypeptide 1 (p85 alpha)                   |
| ILMN_1241378 | 2.19 | <b>Mmp8</b>          | matrix metalloproteinase 8                                                                     |
| ILMN_1260233 | 2.20 | <b>Klhl6</b>         | kelch-like 6 (Drosophila)                                                                      |
| ILMN_2790246 | 2.20 | <b>Herpud1</b>       | homocysteine-inducible, endoplasmic reticulum stress-inducible, ubiquitin-like domain member 1 |
| ILMN_2985282 | 2.21 | <b>Peci</b>          | peroxisomal delta3, delta2-enoyl-Coenzyme A isomerase                                          |
| ILMN_3132898 | 2.21 | <b>Ypel3</b>         | yippee-like 3 (Drosophila)                                                                     |
| ILMN_2645275 | 2.21 | <b>Mvd</b>           | mevalonate (diphospho) decarboxylase                                                           |
| ILMN_2618526 | 2.21 | <b>Napepld</b>       | N-acyl phosphatidylethanolamine phospholipase D                                                |
| ILMN_2730797 | 2.21 | <b>Slc25a10</b>      | solute carrier family 25 (mitochondrial carrier, dicarboxylate transporter), member 10         |
| ILMN_3114641 | 2.22 | <b>Pik3r1</b>        | phosphatidylinositol 3-kinase, regulatory subunit, polypeptide 1 (p85 alpha)                   |
| ILMN_1225594 | 2.23 | <b>1110008P14Rik</b> | RIKEN cDNA 1110008P14 gene                                                                     |
| ILMN_2602711 | 2.24 | <b>Tgfbr1</b>        | transforming growth factor, beta receptor I                                                    |
| ILMN_1215212 | 2.24 | <b>Rhob</b>          | ras homolog gene family, member B                                                              |
| ILMN_2649502 | 2.25 | <b>Adam9</b>         | a disintegrin and metalloproteinase domain 9 (meltrin gamma)                                   |
| ILMN_2966104 | 2.25 | <b>Htra1</b>         | HtrA serine peptidase 1                                                                        |
| ILMN_2771709 | 2.26 | <b>Ppargc1b</b>      | peroxisome proliferative activated receptor, gamma, coactivator 1 beta                         |
| ILMN_2947292 | 2.28 | <b>Map3k6</b>        | mitogen-activated protein kinase kinase kinase 6                                               |
| ILMN_1234702 | 2.28 | <b>Gpt2</b>          | glutamic pyruvate transaminase (alanine aminotransferase) 2                                    |
| ILMN_1246695 | 2.28 | <b>Cd3eap</b>        | CD3E antigen, epsilon polypeptide associated protein                                           |
| ILMN_1260073 | 2.28 | <b>D16Erd472e</b>    | DNA segment, Chr 16, ERATO Doi 472, expressed                                                  |
| ILMN_3118707 | 2.28 | <b>Sla</b>           | src-like adaptor                                                                               |
| ILMN_1226099 | 2.28 | <b>Tnfsf13b</b>      | tumor necrosis factor (ligand) superfamily, member 13b                                         |
| ILMN_3086136 | 2.29 | <b>Agap1</b>         | ArfGAP with GTPase domain, ankyrin repeat and PH domain 1                                      |
| ILMN_3005873 | 2.32 | <b>Sort1</b>         | sortilin 1                                                                                     |
| ILMN_2862619 | 2.33 | <b>Xrcc6</b>         | X-ray repair complementing defective repair in Chinese hamster cells 6                         |
| ILMN_1219915 | 2.35 | <b>Dgat2</b>         | diacylglycerol O-acyltransferase 2                                                             |
| ILMN_3011353 | 2.37 | <b>Mbp</b>           | myelin basic protein                                                                           |
| ILMN_2902492 | 2.38 | <b>Napepld</b>       | N-acyl phosphatidylethanolamine phospholipase D                                                |
| ILMN_2790241 | 2.39 | <b>Herpud1</b>       | homocysteine-inducible, endoplasmic reticulum stress-inducible, ubiquitin-like domain member 1 |
| ILMN_1231096 | 2.43 | <b>Tmem106b</b>      | transmembrane protein 106B                                                                     |
| ILMN_3162570 | 2.43 | <b>Gnptab</b>        | N-acetylglucosamine-1-phosphate transferase, alpha and beta subunits                           |
| ILMN_1230587 | 2.47 | <b>Lpxn</b>          | leupaxin                                                                                       |
| ILMN_2746738 | 2.48 | <b>Htra1</b>         | HtrA serine peptidase 1                                                                        |
| ILMN_2601453 | 2.49 | <b>Fam78a</b>        | family with sequence similarity 78, member A                                                   |
| ILMN_2781520 | 2.49 | <b>D330045A20Rik</b> | RIKEN cDNA D330045A20 gene                                                                     |
| ILMN_2963320 | 2.51 | <b>Cd33</b>          | CD33 antigen                                                                                   |
| ILMN_2675223 | 2.53 | <b>Cd33</b>          | CD33 antigen                                                                                   |
| ILMN_1260061 | 2.53 | <b>D17H6S56E-5</b>   | DNA segment, Chr 17, human D6S56E 5                                                            |
| ILMN_1219717 | 2.56 | <b>Sort1</b>         | sortilin 1                                                                                     |
| ILMN_2612774 | 2.57 | <b>Agfg2</b>         | ArfGAP with FG repeats 2                                                                       |
| ILMN_2834677 | 2.62 | <b>Wipi1</b>         | WD repeat domain, phosphoinositide interacting 1                                               |
| ILMN_2459899 | 2.64 | <b>Adamtsl4</b>      | ADAMTS-like 4                                                                                  |

|              |      |                      |                                                                                 |
|--------------|------|----------------------|---------------------------------------------------------------------------------|
| ILMN_2588682 | 2.71 | <b>Aph1b</b>         | anterior pharynx defective 1b homolog (C. elegans)                              |
| ILMN_2622983 | 2.82 | <b>Dusp1</b>         | dual specificity phosphatase 1                                                  |
| ILMN_2706677 | 2.98 | <b>D330045A20Rik</b> | RIKEN cDNA D330045A20 gene                                                      |
| ILMN_3043036 | 2.98 | <b>Chi3l3</b>        | chitinase 3-like 3                                                              |
| ILMN_2663585 | 3.04 | <b>Jdp2</b>          | Jun dimerization protein 2                                                      |
| ILMN_2891688 | 3.10 | <b>Sdhaf1</b>        | succinate dehydrogenase complex assembly factor 1                               |
| ILMN_1212645 | 3.11 | <b>Slc6a13</b>       | solute carrier family 6 (neurotransmitter transporter, GABA), member 13         |
| ILMN_2813487 | 3.13 | <b>Per1</b>          | period homolog 1 (Drosophila)                                                   |
| ILMN_2648346 | 3.16 | <b>Bst1</b>          | bone marrow stromal cell antigen 1                                              |
| ILMN_3009860 | 3.17 | <b>Sell</b>          | selectin, lymphocyte                                                            |
| ILMN_1377923 | 3.18 | <b>Actb</b>          | actin, beta                                                                     |
| ILMN_2759058 | 3.25 | <b>Rnf103</b>        | ring finger protein 103                                                         |
| ILMN_2813484 | 3.31 | <b>Per1</b>          | period homolog 1 (Drosophila)                                                   |
| ILMN_2712986 | 3.34 | <b>Chi3l3</b>        | chitinase 3-like 3                                                              |
| ILMN_3117876 | 3.36 | <b>Chi3l3</b>        | chitinase 3-like 3                                                              |
| ILMN_2745370 | 3.37 | <b>Sult1a1</b>       | sulfotransferase family 1A, phenol-preferring, member 1                         |
| ILMN_1256644 | 3.48 | <b>Slc6a12</b>       | solute carrier family 6 (neurotransmitter transporter, betaine/GABA), member 12 |
| ILMN_1226997 | 3.57 | <b>Rassf2</b>        | Ras association (RalGDS/AF-6) domain family member 2                            |
| ILMN_2871945 | 3.62 | <b>Trem1</b>         | triggering receptor expressed on myeloid cells 1                                |
| ILMN_2591264 | 3.92 | <b>Orm2</b>          | orosomucoid 2                                                                   |
| ILMN_2701664 | 4.04 | <b>Tsc22d3</b>       | TSC22 domain family, member 3                                                   |
| ILMN_2593774 | 4.11 | <b>1190002H23Rik</b> | RIKEN cDNA 1190002H23 gene                                                      |
| ILMN_1254031 | 4.22 | <b>Klf9</b>          | Kruppel-like factor 9                                                           |
| ILMN_1241610 | 4.40 | <b>Adrb2</b>         | adrenergic receptor, beta 2                                                     |
| ILMN_2944824 | 4.40 | <b>Hp</b>            | haptoglobin                                                                     |
| ILMN_2668509 | 4.95 | <b>Hp</b>            | haptoglobin                                                                     |
| ILMN_2662803 | 4.98 | <b>Ptx3</b>          | pentraxin related gene                                                          |
| ILMN_2718266 | 5.06 | <b>Fkbp5</b>         | FK506 binding protein 5                                                         |
| ILMN_2668510 | 5.39 | <b>Hp</b>            | haptoglobin                                                                     |
| ILMN_2914938 | 6.08 | <b>F13a1</b>         | coagulation factor XIII, A1 subunit                                             |
| ILMN_2662802 | 7.27 | <b>Ptx3</b>          | pentraxin related gene                                                          |
| ILMN_3150811 | 9.32 | <b>Tsc22d3</b>       | TSC22 domain family, member 3                                                   |
| ILMN_2619528 | 9.35 | <b>Klhl6</b>         | kelch-like 6 (Drosophila)                                                       |
| ILMN_2840514 | 9.70 | <b>Klhl6</b>         | kelch-like 6 (Drosophila)                                                       |

**Table S2B:**

**Functional categories of differentially expressed genes in macrophages treated with LPS + Dex**

| GO accession                         | GO term                             | p-value  |
|--------------------------------------|-------------------------------------|----------|
| GO:0050896   GO:0051869              | response to stimulus                | 3.69E-09 |
| GO:0006955                           | immune response                     | 3.46E-19 |
| GO:0002376                           | immune system process               | 5.61E-16 |
| GO:0006950                           | response to stress                  | 7.44E-07 |
| GO:0006952   GO:0002217   GO:0042829 | defense response                    | 2.25E-07 |
| GO:0005125                           | cytokine activity                   | 3.83E-08 |
| GO:0007242                           | intracellular signaling cascade     | 2.01E-05 |
| GO:0009611   GO:0002245              | response to wounding                | 8.61E-05 |
| GO:0006954                           | inflammatory response               | 1.03E-05 |
| GO:0043067                           | regulation of programmed cell death | 2.38E-05 |
| GO:0042981                           | regulation of apoptosis             | 2.02E-05 |

Table S3, Uhlenhaut et al.

**ChIP-sequencing raw reads**

| ChIP sample     | # reads processed | # reads with at least one reported alignment |
|-----------------|-------------------|----------------------------------------------|
| GR Dex          | 35332284          | 14820522 (41.95%)                            |
| GR LPS+Dex      | 32091119          | 13972760 (43.54%)                            |
| GR LPS+Dex 2    | 60383798          | 28662755 (47.47%)                            |
| c-Jun LPS       | 26222756          | 11690492 (44.58%)                            |
| c-Jun LPS+Dex   | 19831176          | 8329632 (42.00%)                             |
| p65 LPS         | 34011023          | 14028618 (41.25%)                            |
| p65 LPS+Dex     | 30141999          | 13146974 (43.62%)                            |
| GRIP1 LPS       | 37365123          | 16560079 (44.32%)                            |
| GRIP1 LPS+Dex   | 39043026          | 19132931 (49.00%)                            |
| IRF3 LPS        | 69350089          | 31229197 (45.03%)                            |
| IRF3 LPS+Dex    | 56555295          | 26853053 (47.48%)                            |
| AcH3K9          | 38830049          | 18586254 (47.87%)                            |
| AcH3K9 LPS      | 26439678          | 14077637 (53.24%)                            |
| AcH3K9 Dex      | 40046499          | 18974267 (47.38%)                            |
| AcH3K9 LPS+Dex  | 38673234          | 19750147 (51.07%)                            |
| c-Jun LPS+Dex 2 | 169465538         | 76177354 (44.95%)                            |
| c-Jun LPS+Dex 3 | 180389509         | 79938678 (44.31%)                            |
| p65 LPS+Dex 2   | 182395230         | 79728446 (43.71%)                            |
| p65 LPS+Dex 3   | 171189812         | 75260143 (43.96%)                            |

## **Supplemental Experimental Procedures, Uhlenhaut et al.**

### **ChIP-Seq Data Analysis**

Data analysis was essentially performed as previously described (Barish et al., 2010). Short DNA reads were aligned against the mouse mm9 reference genome using the Illumina Pipeline Suite v1.7. Reads were aligned using the Bowtie aligner (Langmead et al., 2009) that allows up to 2 mismatches in the read. Only tags that map uniquely to the genome were considered for further analysis. Subsequent peak calling and motif analysis were conducted using HOMER, a software suite for ChIP-Seq analysis. The methods for HOMER, which are described below, have been implemented and are freely available at <http://biowhat.ucsd.edu/homer/> (Heinz et al., 2010). One tag from each unique position was considered to eliminate peaks resulting from clonal amplification of fragments during the ChIP-Seq protocol. Peaks were identified by searching for clusters of tags within a sliding 200 bp window, requiring adjacent clusters to be at least 1 kb away from each other. The threshold for the number of tags that determine a valid peak was selected for a false discovery rate of <0.01, as empirically determined by repeating the peak finding procedure using randomized tag positions. Peaks are required to have at least 4-fold more tags (normalized to total count) than input or IgG control samples and 4-fold more tags relative to the local background region (10 kb) to avoid identifying regions with genomic duplications or non-localized binding. Peaks are annotated to gene products by identifying the nearest RefSeq transcriptional start site. Visualization of ChIP-Seq results was achieved by uploading custom tracks onto the UCSC genome browser. Pathway analysis was performed using GREAT (Genomic Regions Enrichment of Annotations Tool) at <http://great.stanford.edu/> (McLean et al., 2010).

### **Microarray Data Analysis**

Total RNA from primary macrophages was isolated using the RNeasy mini kit (Qiagen) according to standard protocols. RNA integrity and quality was assessed using the Agilent Bioanalyzer. Feature extraction was performed using the Illumina BeadStudio software with default settings. Normalization and identification of differentially expressed genes from biological duplicates were identified using VAMPIRE at <http://sasquatch.ucsd.edu/vampire/> (Hsiao et al., 2005) and GeneSpring GX (Agilent) with a 1.5 fold cutoff. ChIP-Seq peaks were matched to differentially expressed genes based on gene symbols.

### **GRE motif count**

We scanned different binding event categories (entire GR cistrome, GR binding with c-Jun, GR binding with p65, GR binding with cJun and p65, activation, repression) with the GR PWM (full length and half-site) using nmscan (Down and Hubbard, 2005) and a cutoff of -11 and -5 respectively. The cutoffs correspond to a similar level of background motif matches (~0.5). We calculated the fraction of binding events that contained at least one complete GR motif match, the fraction that included at least a half-site GR motif when the complete one was not present, and the fraction that did not contain any GR motif matches. We estimated the background motif content by randomly choosing genomic regions of the same size as bound regions from the genomic space determined by the coordinates of binding events (for each chromosome, first and last binding event determined the space and two largest “binding gaps” were excluded). We included the median motif content in the randomly chosen regions as an estimate of the overall background level.

### **EMSA**

Biotinylated, GRE-containing oligos were ordered from Eurofins MWG Operon. Human recombinant GR protein was obtained from Sigma. Binding reactions were performed in 20mM HEPES pH 7.9, 60mM KCl, 5mM MgCl<sub>2</sub>, 2mM DTT, 10% glycerol, 0.1ug/ul Poly(dIdC) and 0.1mg/ul BSA, run on a 5% polyacrylamide TBE gel and detected using the Chemiluminescent Nucleic Acid Detection Module (Pierce) according to manufacturer's instructions.

### **SiRNA Experiments**



Knockdown of IRF3, GR and GRIP-1 expression in RAW264.7 cells was carried out in 24 well plates using Dharmacon mouse SiGENOME SMARTpool siRNAs (M-041095-01-0005, M-045970-01, M-040667-01, Thermo Scientific) and the HiPerFect transfection reagent (Qiagen) according to the manufacturer's instructions. 50 hours post transfection, cells were treated with 1uM Dex over night and LPS for 3 hours before measuring gene expression levels by qRT-PCR (SYBR Green). Knockdown was confirmed by the same method.

### Primers used

| Name                     | Sequence                                |
|--------------------------|-----------------------------------------|
| <b>qRT-PCR</b>           |                                         |
| mIL-1a-F                 | GCACCTTACACCTACCAGAGT                   |
| mIL-1a-R                 | AAACTTCTGCCTGACGAGCTT                   |
| mIL-6-F                  | TAGTCCTTCTACCCCAATTTCC                  |
| mIL-6-R                  | TTGGTCCTTAGCCACTCCTTC                   |
| mNos2-F                  | GTTCTCAGCCCAACAATACAAGA                 |
| mNos2-R                  | GTGGACGGGTCGATGTCAC                     |
| mMmp13-F                 | ACCTCCACAGTTGACAGGCT                    |
| mMmp13-R                 | AGGCACTCCACATCTTGTTTT                   |
| mTnfsf10-F               | ATGGTGATTTGCATAGTGCTCC                  |
| mTnfsf10-R               | GCAAGCAGGGTCTGTTCAAGA                   |
| mGilz-F                  | ACCACCTGATGTACGCTGTG                    |
| mGilz-R                  | TCTGCTCCTTTAGGACCTCCA                   |
| <b>Cloning (pGL4.23)</b> |                                         |
| Ccnd1-XhoI-EcoRV         | cgctcgaggatcGAAGGGCTCGTTGCCATTCC        |
| Ccnd1-HindIII-EcoRV      | cgaagcttgatcAGCATCAGGTCAAGCCATGC        |
| Cd86-XhoI-EcoRV          | cgctcgaggatcGTCAGCCTAAATGGTTAAAGG       |
| Cd86-HindIII-EcoRV       | cgaagcttgatcATGGGTGTTTTGCTCACATGG       |
| Btg1-XhoI-EcoRV          | cgctcgaggatcAGCCCAGCACAGCATAAAGC        |
| Btg1-HindIII-EcoRV       | cgaagcttgatcTTAAACAGTTGACCATGACG        |
| Ccl2-XhoI-EcoRV          | cgctcgaggatcTACTATGTCTTGGTGCTCC         |
| Ccl2-HindIII-EcoRV       | cgaagcttgatcCTAACTCAGTCTCTGAATCC        |
| Il6-XhoI-EcoRV           | cgctcgaggatcACAGGCTATCTCTTCAGTGG        |
| Il6-HindIII-EcoRV        | cgaagcttgatcGCAAACCAGAGGTTTAGCAC        |
| Tnfsf10-XhoI-EcoRV       | cgctcgaggatcATGTGTACCTACACACATGC        |
| Tnfsf10-HindIII-EcoRV    | cgaagcttgatcCAGAGAAAGGCCATCACTGG        |
| Il1r2-XhoI-EcoRV         | cgctcgaggatcTGTGTCTCTGTCTTTCAGTG        |
| Il1r2-HindIII-EcoRV      | cgaagcttgatcTCCAGCTAACATAACGGAGC        |
| Lcn2-XhoI-EcoRV          | cgctcgaggatcAGTTCAGCTGCTGCCCTGTC        |
| Lcn2-HindIII-EcoRV       | cgaagcttgatcAGGTCTGATGTGTGCTGGAG        |
| Tlr2-XhoI-EcoRV          | cgctcgaggatcGTCTATAAATTGCACAGAGG        |
| Tlr2-HindIII-EcoRV       | cgaagcttgatcTGACTAGAAGAGCCAATCC         |
| Ccnd3-XhoI-EcoRV         | cgctcgaggatcGTGAAGTGATGAATAATGC         |
| Ccnd3-HindIII-EcoRV      | cgaagcttgatcTTGACAGCTCTTTGAAACGC        |
| Map3k6-XhoI-EcoRV        | cgctcgaggatcCTCTGAGGAAAGCGCTTGTC        |
| Map3k6-HindIII-EcoRV     | cgaagcttgatcCACAGGTCACAGAAGAGTCC        |
| Per1-XhoI-EcoRV          | cgctcgaggatcAGAACCAGGCATGGGGGCGG        |
| Per1-HindIII-EcoRV       | cgaagcttgatcGGAGAAGCGGGGGCAGGAGAG       |
| <b>QuickChange</b>       |                                         |
| <b>Mutagenesis</b>       |                                         |
| Ccnd1_QCMut-F            | CCAGTCAGAGGCTGCAGAATTTGCAGGACCTTTTCAAAG |
| Ccnd1_QCMut-R            | CTTTCAAAGGTCCTGCAAATTTCTGCAGCCTCTGACTGG |

|                  |                                              |
|------------------|----------------------------------------------|
| Il6_QCMut-F      | GCACATCATTCTCTTGGCATGGGCCAAGATCATTATAGGAG    |
| Il6_QCMut-R      | CTCCTATAATGATCTTGGCCCATGCCAAGAGAATGATGTGC    |
| Tnfsf10_QCMut-F  | GCACCAGGACCAGTGCTTCATTCTGTGAACAGGAGGCAC      |
| Tnfsf10_QCMut-R  | GTGCCTCCTGTTACAGAATGAAGCACTGGTCTGGTGC        |
| Cd86_QCMut-F     | GAAAGTAACATTTTAATAATGGAACATGACACA AGACCATG   |
| Cd86_QCMut-R     | CATGGTCTTGTGTCATGTTCCATTATTTAAATGTTACTTTC    |
| Ccl2_QCMut-F     | GTTGCGACAGCAGATTGCTCTAAGACCTGAATCCCTAAGTCCCC |
| Ccl2_QCMut-R     | GGGGACTTAGGGATTCAAGTCTTAGAGCAATCTGCTGTCGCAAC |
| Btg1_QCMut-F     | GAAAGAAAATTAACAATAGGATGACAAAAGAGATGTGTGTGTG  |
| Btg1_QCMut-R     | CACACACACATCTCTTTTGTGCATCCTATTGTTAATTTTCTTTC |
|                  |                                              |
| <b>EMSA</b>      |                                              |
| Ccnd1-F          | CCAGTCAGAGGCTGCAGAACATGCAGGACC               |
| Ccnd1-R          | GGTCCTGCATGTTCTGCAGCCTCTGACTGG               |
| Ccl2-F           | GCAGATTGCACAATGTCCTGAATCC                    |
| Ccl2-R           | GGATTCAGGACATTGTGCAATCTGC                    |
| Il6-F            | GGCTTCCTGTTCCCTCAAAGT                        |
| Il6-R            | ACTTTGAGGAACAGGAAGCC                         |
| Per1-F           | AGAGAACACGATGTTCCCTA                         |
| Per1-R           | TAGGGAACATCGTGTCTCT                          |
| Neg.Ctrl.        | GATCGATCGATCGATCGATC                         |
|                  |                                              |
| <b>ChIP-qPCR</b> |                                              |
| mCcl2-F          | GATCTGGCTGGAGAAAACGG                         |
| mCcl2-R          | TCTGCTGTCGCAACACTCGT                         |
| mIl1a-F          | TTGGGAAAACACCCTTGGTTC                        |
| mIl1a-R          | GAGCTGGACTGGCTGTTGC                          |
| mIl6-F           | GCAATCCTGTCTATTGCACGG                        |
| mIl6-R           | TGCATCAGATACTGAAGAGGAAGT                     |
| mNos2-F          | TGCCAAGAGATGCAGTTGAGG                        |
| mNos2-R          | GCTTGGGTTTCGAGGCCTAC                         |
| mMmp13-F         | TGCACAAACACATCAAACCTTCTG                     |
| mMmp13-R         | CTTAGTAACTAGGGCAAACCCCC                      |
| mTnfsf10-F       | AGGAAGAAGGAGGACAGGCC                         |
| mTnfsf10-R       | CGTGTGAGTGACTTGCGCTC                         |
| mGilz-F          | GGAGTTGGGTTCTGCCTGAG                         |
| mGilz-R          | CCTGACCCTGTCTTTCCAGTG                        |
| mPer1-F          | TGGAACATCCTGTTCTCAGCG                        |
| mPer1-R          | AAGGAAGGCTGTGGCCAAC                          |
| mDusp1-F         | ACAGACAGAATGGTGGTTTTTACTCC                   |
| mDusp1-R         | CCCCTTGCTTTCAAATGTTACAC                      |
| mTlr2-F          | CACCCATTTGTGCGTGACTG                         |
| mTlr2-R          | GAGCTAACACCATGCCCTGG                         |

## Supplemental References

- Barish, G.D., Yu, R.T., Karunasiri, M., Ocampo, C.B., Dixon, J., Benner, C., Dent, A.L., Tangirala, R.K., and Evans, R.M. (2010). Bcl-6 and NF-kappaB cistromes mediate opposing regulation of the innate immune response. *Genes Dev* 24, 2760-2765.
- Down, T.A., and Hubbard, T.J. (2005). NestedMICA: sensitive inference of over-represented motifs in nucleic acid sequence. In *Nucleic Acids Res (England)*, pp. 1445-1453.
- Heinz, S., Benner, C., Spann, N., Bertolino, E., Lin, Y.C., Laslo, P., Cheng, J.X., Murre, C., Singh, H., and Glass, C.K. (2010). Simple combinations of lineage-determining transcription factors prime cis-regulatory elements required for macrophage and B cell identities. *Mol Cell* 38, 576-589.
- Hsiao, A., Ideker, T., Olefsky, J.M., and Subramaniam, S. (2005). VAMPIRE microarray suite: a web-based platform for the interpretation of gene expression data. *Nucleic Acids Res* 33, W627-632.
- Langmead, B., Trapnell, C., Pop, M., and Salzberg, S.L. (2009). Ultrafast and memory-efficient alignment of short DNA sequences to the human genome. *Genome Biol* 10, R25.
- McLean, C.Y., Bristor, D., Hiller, M., Clarke, S.L., Schaar, B.T., Lowe, C.B., Wenger, A.M., and Bejerano, G. (2010). GREAT improves functional interpretation of cis-regulatory regions. *Nat Biotechnol* 28, 495-501.
